# Supplementary material for: Risks for comorbidity in children with atopic disorders: an observational study in Dutch general practices
Source: PubMed Central journal article supplement — BMJ Open. 2017 Nov 12;7(11):e018091. doi: 10.1136/bmjopen-2017-018091 (PMC5695444; doi:10.1136/bmjopen-2017-018091), 2017-11-12
Supplement: bmjopen-2017-018091.draft_revisions.pdf [file bmjopen-2017-018091.draft_revisions.pdf]

# BMJ Open

BMJ Open is committed to open peer review. As part of this commitment we make the peer review history of every article we publish publicly available.

When an article is published we post the peer reviewers' comments and the authors' responses online. We also post the versions of the paper that were used during peer review. These are the versions that the peer review comments apply to.

The versions of the paper that follow are the versions that were submitted during the peer review process. They are not the versions of record or the final published versions. They should not be cited or distributed as the published version of this manuscript.

BMJ Open is an open access journal and the full, final, typeset and author-corrected version of record of the manuscript is available on our site with no access controls, subscription charges or pay-per-view fees (<http://bmjopen.bmj.com>).

If you have any questions on BMJ Open's open peer review process please email [editorial.bmjopen@bmj.com](mailto:editorial.bmjopen@bmj.com)

# BMJ Open

## Risks for comorbidity in atopic children: an epidemiological study in general practice

|                                 |                                                                                                                                                                                                                                                                                                         |
|---------------------------------|---------------------------------------------------------------------------------------------------------------------------------------------------------------------------------------------------------------------------------------------------------------------------------------------------------|
| Journal:                        | <i>BMJ Open</i>                                                                                                                                                                                                                                                                                         |
| Manuscript ID                   | bmjopen-2017-018091                                                                                                                                                                                                                                                                                     |
| Article Type:                   | Research                                                                                                                                                                                                                                                                                                |
| Date Submitted by the Author:   | 05-Jun-2017                                                                                                                                                                                                                                                                                             |
| Complete List of Authors:       | Pols, David; Erasmus MC, Family Medicine<br>Bohnen, Arthur; Erasmus MC, General Practice<br>Nielen, Markus MJ; NIVEL, Netherlands Institute for Health Services Research,<br>Korevaar, J; Netherlands Institute for Health Services Research (NIVEL),<br>Bindels, Patrick; Erasmus MC, General Practice |
| <b>Primary Subject Heading</b>: | General practice / Family practice                                                                                                                                                                                                                                                                      |
| Secondary Subject Heading:      | Ear, nose and throat/otolaryngology, Epidemiology, Immunology (including allergy), Paediatrics, Respiratory medicine                                                                                                                                                                                    |
| Keywords:                       | PRIMARY CARE, EPIDEMIOLOGY, PAEDIATRICS                                                                                                                                                                                                                                                                 |
|                                 |                                                                                                                                                                                                                                                                                                         |

SCHOLARONE™  
Manuscripts

# Risks for comorbidity in atopic children: an epidemiological study in general practice

David H.J. Pols<sup>1</sup>, Arthur M. Bohnen<sup>1</sup>, Mark M.J. Nielen<sup>2</sup>, Joke C. Korevaar<sup>2</sup>, Patrick J.E. Bindels<sup>1</sup>

1. Department of General Practice, Erasmus MC, University Medical Center Rotterdam

2. NIVEL, Netherlands Institute for Health Services Research, Utrecht

## Corresponding author:

David HJ Pols

Dept. of General Practice

Erasmus University Medical Center Rotterdam

PO Box 2040, 3000 CA Rotterdam

The Netherlands

Telephone: +31 (0)10-7044824

Email: [d.pols@erasmusmc.nl](mailto:d.pols@erasmusmc.nl)

Website: <http://www.erasmusmc.nl/huisartsgeneeskunde>

## Abstract

**Objective:** This study aimed to investigate both atopic and non-atopic comorbid symptoms and diseases in children with physician-diagnosed atopic disorders (atopic eczema, asthma and allergic rhinitis).

**Methods:** All children aged 0-18 years listed in a nationwide primary care database (NIVEL-PCD) with routinely collected health care data in 2014 were selected. Atopic children were matched on age and gender with non-atopic controls within the same general practice. A total of 404 ICPC codes were examined. Logistic regression analyses were performed to examine the associations between the presence of atopic disorders and (non-) atopic symptoms and diseases by calculating odds ratios (OR).

**Results:** Having one of the atopic disorder significantly increased the risk of having other atopic-related symptoms, even if the child was not registered as having the related atopic disorder. Regarding non-atopic comorbidity, children with atopic eczema (n: 15,530) were at significantly increased risk for (infectious) skin diseases (OR: 1.2-3.4). Airway symptoms or (infectious) diseases (OR: 2.1-10.3) were observed significantly more frequently in children with asthma (n: 7,887). Children with allergic rhinitis (n: 6,835) had a significantly distinctive risk of ear-nose-throat related symptoms and diseases (OR: 1.5-3.9). Neither age nor gender explained these increased risks.

**Conclusion:** General practitioners are not always fully aware of relevant atopic and non-atopic comorbidity. In children known to have at least one atopic disorder, specific attention is required to avoid possible insufficient treatment and unnecessary loss of quality of life.

**Keywords:** Atopic dermatitis, Asthma, Allergic rhinitis, General practice, Comorbidity, Epidemiology

## Strengths and limitations of this study

- The present study used an extensive and representative general practice database.
- The large number of children gives the study substantial power and generalizability.
- A total of 404 ICPC codes were examined.
- A limitation regarding this type of explorative study is the unavoidable multiple testing.

For peer review only

## Introduction

Atopic disorders represent an important health problem in general practice. Acute upper airway infections, middle ear infections, warts, asthma, and atopic eczema represent the five most prevalent pediatric diseases diagnosed in general practice (1); allergic rhinitis is on the 12<sup>th</sup> place in this list. However, limited data are available on the co-morbidities of atopic children in primary care. In the present study we refer to atopy as one or more of the following established diagnosis: atopic eczema, asthma and/or allergic rhinitis.

Associations have been shown between atopic disorders and other diseases in children, but in different clinical settings (e.g. birth cohorts, hospitals, or pediatric clinics). Proven interrelations exist with (among others) diabetes (2-4), ADHD (5-7), autism (8-10), and obesity (11-13). According to other studies, the presence of some comorbidities may even influence the course of atopic disorders. For example, acute upper airway infections, especially in early childhood, are related to atopic disorders later in life (14, 15). Acute viral 'non-respiratory syncytial virus' bronchiolitis in infants aged <6 months is linked with an increased risk of developing asthma (16). The developing immune system of a child might be affected by frequent or severe infections of the middle ear, resulting in increased risk for asthma and atopic eczema (17). On the other hand, otitis media with effusion is associated with allergic rhinitis (18-20). The quality of life of an atopic child can be significantly improved by providing sufficient treatment.

To our knowledge no study has investigated the complete range of potential comorbidities in atopic children in a general practice setting. Relevant questions include: Are atopic children at increased risk for specific non-atopic symptoms or diseases, that general practitioners (GPs) should be aware in order to reduce the risk of underdiagnosing relevant comorbidity? Are children with one atopic disorder at risk to be underdiagnosed with another atopic disorder? To study possible associations between atopic disorders and 404 different symptoms

1  
2  
3  
4  
5  
6  
7  
8  
9  
10  
11  
12  
13  
14  
15  
16  
17  
18  
19  
20  
21  
22  
23  
24  
25  
26  
27  
28  
29  
30  
31  
32  
33  
34  
35  
36  
37  
38  
39  
40  
41  
42  
43  
44  
45  
46  
47  
48  
49  
50  
51  
52  
53  
54  
55  
56  
57  
58  
59  
60

62 and diseases, an extensive and representative nationwide general practice database is explored using a cross-  
63 sectional design.

For peer review only

## 64 **Methods**

### 65 **Study population**

66 All non-institutionalized residents in the Netherlands are registered in a general practice, even if they do not  
67 visit the GP on a regular basis. The Netherlands Institute for Health Services Research-Primary Care Database  
68 (NIVEL-PCD) is based on routinely recorded data in electronic health records (EHRs) of all listed patients in the  
69 participating practices. In 2014, about 500 general practices participated, including data of about 1,700,000  
70 patients ([www.nivel.nl/en/dossier/nivel-primary-care-database](http://www.nivel.nl/en/dossier/nivel-primary-care-database)), which is over 10% of the total Dutch  
71 population. EHR data include a variety of information regarding type of consultation, morbidity, and  
72 prescriptions. Data available for 2014 are representative for the Dutch population (21). Primary care physicians  
73 (gatekeepers for the Dutch healthcare system) recorded morbidity using the International Classification of  
74 Primary Care (ICPC), a classification method for primary care that is accepted by the WHO (22). Dutch GPs  
75 cluster relevant consultations, prescriptions and referrals, in ICPC classified episodes of care. Atopic disorders  
76 are labeled with ICPC codes: S87 (atopic eczema), R96 (asthma) and R97 (allergic rhinitis). ICPC-codes specific  
77 for food-allergies are not available.

78 For the present study, only morbidity data from EHRs of general practices with sufficient data quality were  
79 used that fulfilled the following criteria: i) at least 500 listed patients (standard practice: 2,350 patients), ii)  
80 complete morbidity registration (defined as  $\geq 46$  weeks/year), and iii) sufficient ICPC coding of diagnostic  
81 information (defined as  $\geq 70\%$  of the recorded disease episodes labeled with an ICPC code). The following  
82 descriptive data were routinely collected: period in which the individual child was registered in the general  
83 practice, the unique code of the GP practice, the child's gender, and year and quarter of birth.

### 84 **Atopic children**



1  
2  
3 85 For each child (0-18 years), a minimum follow-up of 3 years was required for the present study to reduce the  
4  
5  
6 86 risk of registration bias. In the Netherlands, GPs see about 67% of their patient population at least once a year  
7  
8 87 (23). We considered a 3-year follow-up period to be sufficient time for a GP to diagnose a child with (atopic)  
9  
10 88 disorders. Furthermore, in order not to miss any relevant atopic diagnosis, when available, the EHRs from  
11  
12 89 2002-2014 were examined. Since GPs inevitably work with probability diagnoses, there is a risk of  
13  
14  
15 90 misclassification. To select cases with a higher probability of a clinically relevant disorder, ICPC codes and their  
16  
17 91 related episodes of care can be corrected. In practice, an atopic episode of care was maintained if (between  
18  
19 92 2002-2014) the child had at least two contact moments in that episode of care and had received at least two  
20  
21 93 relevant prescriptions. If the child did not meet these criteria, the child was considered not to have that atopic  
22  
23  
24 94 disorder (24). If a child was diagnosed with an atopic disorder for the first time during 2014, the child was  
25  
26 95 considered to have the atopic disorder that whole year. In the present study, the atopic diagnosis was based on  
27  
28  
29 96 the physician's assessment.

### 30 31 32 97 *Atopic triad*

33  
34  
35 98 A recent meta-analysis supported the hypothesis that there might be a fourth distinct group of children with all  
36  
37 99 three atopic disorders, in contrast to the traditional classification of children with asthma *or* allergic rhinitis *or*  
38  
39 100 atopic eczema (25). To learn more about this potentially unique group of children, 'atopic triad' episodes were  
40  
41  
42 101 developed for research purposes. These episodes were only created when a child was diagnosed with all three  
43  
44 102 atopic disorders, based on available data from EHRs in the period 2002-2014.

### 45 46 47 103 **Symptoms and diseases studied**

48  
49  
50 104 After establishing which child had an atopic disorder (see above), a child was considered prevalent for a specific  
51  
52  
53 105 symptom or disease if the child had at least one active episode of care for that symptom or disorder in the year  
54  
55 106 2014. All ICPC codes that describe a symptom or a disease were examined, with the exception of trauma-  
56  
57 107 related ICPC codes, ICPC codes not relevant for children (e.g. presbycusis), pregnancy, childbearing, family  
58  
59  
60

1  
2  
3 108 planning, sexual transmitted diseases and social problems, leaving 404 different ICPC codes. Furthermore, since  
4  
5 109 different classifications are used for eczema, there is a risk of misclassification. The ICPC system distinguishes  
6  
7  
8 110 the codes S86 (seborrheic dermatitis), S87 (atopic eczema), S88 (contact dermatitis / eczema another) and S89  
9  
10 111 (diaper rash). Since clinical differentiation can be very difficult, especially between S87 and S88, S88 was  
11  
12 112 excluded from our analyses, to get more reliable results for 'true' atopic eczema (S87).

### 13 14 15 16 113 **Design**

17  
18  
19 114 A nested case-control study design was used. For each atopic child, one matched control patient was selected  
20  
21 115 (not diagnosed with an atopic disorder) within the same general practice, based on age and gender in 2014.  
22  
23 116 Odds ratios (ORs) were calculated for children that solely had atopic eczema, asthma, or allergic rhinitis and  
24  
25  
26 117 therefore no other atopic comorbidity. Appendix 1 presents a list of all the ICPC codes that were examined. A  
27  
28 118 1:1 ratio was chosen to be able to include as many pairs of cases and controls as possible, allowing the results  
29  
30 119 to carry more weight and making the conclusions more generalizable to future populations. In the present  
31  
32  
33 120 study, a 1:2 ratio would have resulted in dropping over 40% of the cases.

### 34 35 36 121 **Statistical analyses**

37  
38  
39 122 Logistic regression analysis was performed to study associations between the presence of atopic disorders and  
40  
41 123 (non-) atopic comorbid symptoms and diseases in children. Similarly, associations between atopic triad and the  
42  
43 124 above-mentioned comorbid symptoms and diseases were examined. Due to multiple testing, only associations  
44  
45  
46 125 with  $p \leq 0.001$  were considered statistically significant. All associations were tested for the modifying effects of  
47  
48 126 age and gender. In case of a significant effect ( $p \leq 0.01$ ), associations were also presented for subgroups for age  
49  
50 127 (0-6 vs. 7-12 vs. 13-18 years) and gender (boy vs. girl). Finally, due to the hierarchical structure of the data  
51  
52  
53 128 (patients registered in general practices), a multi-level logistic regression analysis was performed to test  
54  
55 129 whether clustering effects influenced our findings. All analyses were conducted in Stata 13 and Excel 2010.  
56  
57 130 Prevalence rates are presented in percentages.

1  
2  
3 131 **Ethical approval**

4  
5  
6 132 Dutch law allows the use of EHRs for research purposes under certain conditions. According to this legislation,  
7  
8  
9 133 it is not necessary to obtain informed consent from patients or approval from a medical ethics committee for  
10  
11 134 this type of observational study that contains no directly identifiable data (Dutch Civil Law, Article 7: 458).  
12  
13 135 Therefore, no waiver of ethical approval was obtained from an Institutional Review Board (IRB) or ethics  
14  
15  
16 136 committee. The authors had no access to any identifying information at any moment during the analysis of the  
17  
18 137 data.

## Results

### General characteristics (Table 1)

409,312 children were identified in the NIVEL-PCD in 2014, initially including 70,494 atopic children with at least one atopic disorder. However, for an atopic child to be included in this study, one matched control patient had to be available (i.e. a child without an atopic disorder). After selecting children with an atopic disorder **and** with a higher probability of a clinically relevant disorder **and** with at least three years follow-up, 21,285 children with atopic eczema were identified, of which 15,530 children had atopic eczema without another atopic disorder. For asthmatic children, 13,196 children were identified, of which 7,887 had asthma only and no other atopic disorders. In children with AR, 11,483 were identified of which 6,835 had AR without another atopic disorder. Finally, 559 children had all three atopic disorders. All the children in these groups were selected from 316 different general practices participating in NIVEL-PCD. Clustering effects did not influence our findings.

### Atopic eczema (Table 2)

A substantial part of the significantly related comorbidity for children with atopic eczema concerns skin diseases such as (among others): warts (OR 1.2), localized rash (OR 1.5), pruritus (OR 1.7), impetigo (OR 1.7), dermatophytosis (OR 1.8), urticaria (OR 1.8), molluscum contagiosum (OR 1.9) and psoriasis (OR 3.4). Otitis externa (OR 1.6) and blepharitis (OR 1.5) were also significantly associated with atopic eczema. The symptom diagnosis of wheezing (OR 2.0), that could be attributed to asthma, is noteworthy since these children were not diagnosed or coded in the EHRs with asthma. The same applies to symptoms associated with allergic rhinoconjunctivitis, such as sneezing/nasal congestion (OR 2.0) and allergic conjunctivitis (OR 2.0). Older children with atopic eczema were at increased risk to develop a localized rash (OR 1.3 - > 2.3) and impetigo (OR

1  
2  
3 159 1.5 - >2.7). Compared to boys, girls had an increased risk, to develop a localized rash (OR 2.0 vs. 1.1), breathing  
4  
5  
6 160 problems (OR 3.6 vs. 0.9) and stomach function disorder (OR 3.3 vs. 0.7).  
7

### 8 9 161 **Asthma (Table 3)**

10  
11  
12 162 Noteworthy are asthma-related symptoms that were diagnosed separately, such as shortness of  
13  
14 163 breath/dyspnea (OR 7.7) and wheezing (OR 10.3). Furthermore, asthmatic children consulted their GP more  
15  
16 164 frequently for airway-related infections such as: acute laryngitis/tracheitis (OR 2.3), acute upper respiratory  
17  
18 165 infection (OR 2.4), pneumonia (OR 4.0) and acute bronchitis (OR 4.8). In children with asthma, there seems to  
19  
20  
21 166 be a higher risk for the development of gastrointestinal symptoms, e.g.: general abdominal pain/cramps (OR  
22  
23 167 1.4), localized abdominal pain (OR 1.4), constipation (OR 1.4) and vomiting (OR 2.0). Acute bronchitis (OR 3.7 -  
24  
25  
26 168 >8.1) was diagnosed more often in older children. Inguinal hernias were seen more frequently in girls than in  
27  
28 169 boys (OR 4.5 vs. 0.3).  
29

### 30 31 170 **Allergic rhinitis (Table 4)**

32  
33  
34 171 Children with allergic rhinitis visit their GPs more frequently for ear-nose-throat related symptoms and  
35  
36 172 diseases. Among others, the following were diagnosed more often: throat symptom/complaint (OR 1.5), ear  
37  
38 173 pain/earache (OR 1.9), hypertrophy tonsils/adenoids (OR 1.9), acute/chronic sinusitis (OR 2.0), nose symptom  
39  
40 174 (OR 2.6) and sneezing/nasal congestion (OR 3.9). Furthermore, symptoms associated with atopic eczema  
41  
42 175 (pruritus; OR 2.2) and asthma [shortness of breath/dyspnea (OR 2.7) and wheezing (OR 4.3)] were seen more  
43  
44 176 frequently. Also, when a child was diagnosed with allergic rhinitis, there was a substantial risk for the  
45  
46 177 development of gastrointestinal symptoms [constipation (OR 1.5) and localized abdominal pain (OR 1.8)].  
47  
48 178 Hypertrophy of the tonsils was diagnosed less frequently when children got older (OR 3.2 - >1.0). On the other  
49  
50  
51 179 hand, children were more frequently diagnosed with a viral exanthema when they became older (OR 0.3 -  
52  
53 180 >4.5). A presumed gastro-intestinal infection (OR 3.4 vs. 1.3), speech disorder (OR 2.4 vs. 0.9) and  
54  
55 181 blepharitis/style/chalazion (OR 3.3 vs. 1.2) were diagnosed more frequently in girls with allergic rhinitis.  
56  
57  
58  
59  
60

1  
2  
3 182 **Atopic triad (Table 5)**  
4  
5

6 183 Having all three atopic disorders is relatively rare, with only a few symptoms and diseases being significantly  
7  
8  
9 184 related. The risk for developing an 'allergy', that the GP considers relevant to register in the EHR can be  
10  
11 185 considered high (OR 17.8). Allergic conjunctivitis (OR 6.8) is also frequently seen in children with all three atopic  
12  
13 186 disorders.  
14  
15  
16  
17  
18  
19  
20  
21  
22  
23  
24  
25  
26  
27  
28  
29  
30  
31  
32  
33  
34  
35  
36  
37  
38  
39  
40  
41  
42  
43  
44  
45  
46  
47  
48  
49  
50  
51  
52  
53  
54  
55  
56  
57  
58  
59  
60

## Discussion

### Main findings

The present study used an extensive and representative general practice database (21). The large number of children gives the study substantial power and generalizability. This could also allow evaluation of possible links between atopic disorders and rare childhood diseases. This study showed that atopic children have an increased risk for the development of both atopic and non-atopic diseases and symptoms. Children diagnosed with one atopic disorder were frequently diagnosed by their GP with symptoms associated with one of the other atopic disorders. This suggests that GPs are not always fully aware of relevant atopic comorbidity, or at least do not label it correctly. For example, a child with atopic eczema that presents with 'wheeze' or 'dyspnea' is at a higher risk for the development of asthma compared to a child without atopic eczema. A GP should be aware of this increased risk, since it could result in insufficient treatment of a child. Regarding non-atopic comorbidity, strong associations were found between the atopic disorder and diseases and symptoms related to the same organ system. For example, children with atopic eczema are at increased risk for the development of other skin diseases, asthmatic children are at risk of other airway diseases, and children with allergic rhinitis are at risk of ear-nose-throat-related symptoms and diseases. Gastro-intestinal and musculoskeletal diseases and symptoms were also seen more frequently in atopic children. When exploring possible interactions of age and gender in children with one atopic disorders, no clear patterns arose.

### Interpretation of findings in relation to previously published work

Children with atopic eczema had an increased risk of developing infectious skin diseases such as warts, impetigo, dermatophytosis and molluscum contagiosum. The common etiology could be the barrier dysfunction of the skin in children with atopic eczema. This barrier dysfunction is also seen in psoriasis, a disease that, according to the present study, is associated with atopic eczema (OR 3.4). Although the clinical

1  
2  
3 209 pictures of these two diseases are different, they share some common pathological backgrounds such as  
4  
5  
6 210 barrier dysfunction and enhanced IL-22 expression (26). Otitis externa and blepharitis both had significant ORs.  
7  
8 211 These disorders could in fact be an expression of atopic eczema.  
9

10  
11 212 Children with asthma seem to have consulted their GP more frequently for airway-related infections such as  
12  
13 213 acute laryngitis/tracheitis, acute upper respiratory infection, pneumonia and bronchitis. An explanation for this  
14  
15 214 could be that airway infections increase asthma symptoms or vice versa, that asthma resulted in increased  
16  
17  
18 215 susceptibility for infection, which increased their motivation to visit the GP. Furthermore, the awareness of  
19  
20 216 parents is likely to be increased when a child suffers from asthma, since such an infection could predispose for  
21  
22 217 an asthma exacerbation.  
23  
24

25  
26 218 Children with allergic rhinitis consulted their GPs more frequently for ear-nose-throat-related symptoms and  
27  
28 219 diseases. However, even more striking are the asthma-related symptoms. Both shortness of breath (OR 2.7)  
29  
30 220 and wheeze (OR 4.3) were frequently seen in children with allergic rhinitis. There is strong evidence that  
31  
32 221 allergic rhinitis has an adverse impact on asthma severity (27). Because allergic rhinitis can provoke asthma  
33  
34 222 symptoms, allergic rhinitis symptoms should be taken more seriously by GPs to reduce insufficient treatment.  
35  
36

37  
38 223 Gastrointestinal-related symptoms are also frequently diagnosed by GPs in atopic children. This is in  
39  
40 224 accordance with a study in adults in a primary care setting (28). These symptoms could be related to IgE-  
41  
42 225 mediated food allergies or in rare cases even to eosinophilic esophagitis that are associated with atopic  
43  
44 226 disorders (29); however, in children, abdominal pains can also be a general expression of not feeling well.  
45  
46  
47 227 Unfortunately, the ICPC classification system does not cover the above-mentioned gastrointestinal diseases  
48  
49 228 with unique code and, therefore, gastrointestinal-related symptoms might have been used by the GP to label  
50  
51 229 these diseases.  
52  
53

54  
55 230 Some associations described in the literature were not confirmed in the present study, e.g. serous otitis media  
56  
57 231 in patients with allergic rhinitis (18, 20), and inflammatory bowel disease (30, 31), leukemia (32, 33) and  
58  
59  
60



1  
2  
3  
4  
5  
6  
7  
8  
9  
10  
11  
12  
13  
14  
15  
16  
17  
18  
19  
20  
21  
22  
23  
24  
25  
26  
27  
28  
29  
30  
31  
32  
33  
34  
35  
36  
37  
38  
39  
40  
41  
42  
43  
44  
45  
46  
47  
48  
49  
50  
51  
52  
53  
54  
55  
56  
57  
58  
59  
60

232 diabetes (34, 35) in atopic patients. The prevalence rates of some of these disorders are low and a cross-sectional design (as used in the present study), might not be sufficient to prove this relationship.

### 234 **Strengths and limitations of this study**

235 Using general practice databases (by means of a cross-sectional design) also has its limitations. First of all, a  
236 limitation for the present study is the GP's choice for ICPC coding of an episode of care. For example, a child  
237 with a wheeze could either be labeled as 'asthma' (R96) or labeled as 'wheeze' (R03). This could result in both  
238 overestimation or underestimation of asthma. To decrease this risk of overestimation regarding atopic  
239 disorders, some episodes were corrected in order to increase the clinical relevance of the atopic disorder of  
240 interest. However, the risk of underestimation was not tackled, since too many assumptions need to be made.  
241 The second limitation regarding this type of explorative study is the unavoidable multiple testing. Although  
242 conservative p-values were used, type 1 errors cannot be avoided. In this study, some suggested associations  
243 might in fact reflect these type 1 errors. Thirdly, because data on socioeconomic status, tobacco smoke  
244 exposure and other lifestyle-related risk factors are not recorded in NIVEL-PCD, we cannot rule out the effect of  
245 these risk factors on the observed relations. However, since the children with atopic disorders were matched  
246 with controls within the same general practice, all children are most likely living in the same neighborhoods  
247 and therefore the effect of most of the earlier mentioned risk factors is expected to be small. Fourthly, atopic  
248 children might visit the GP more frequently than non-atopic children. And although this may be more  
249 representative of parental fears, rather than an indication of morbidity, it can result in more ICPC codes in  
250 atopic children and could partly explain some of the associations found. In future research, the number of  
251 consultations might need to be taken into account in the analyses. Fifth of all, in the present study the  
252 diagnosis are based on a physician's assessment and not on confirmed sensitization pattern for allergens.  
253 According to the Dutch medical guideline for eczema (36), GPs are not advised to determine these  
254 sensitization patterns, since this doesn't have any clinical consequences. Although atopy is clearly associated

1  
2  
3 255 with atopic eczema, the role of IgE sensitization in atopic eczema still needs further study (37). Also in children  
4  
5  
6 256 with AR, sensitization patterns don't have added value if the medical history clearly suggests e.g. a pollen  
7  
8 257 allergy (38). Only when the cause of the rhinitis is uncertain, the determination of sensitization patterns adds  
9  
10 258 value. The medical guidelines for asthma in children advises to determine sensitization patterns (39), since it  
11  
12 259 can help diagnose allergic asthma (40) and because it could have clinical consequences. Finally, it is important  
13  
14  
15 260 to acknowledge the uncertainty of general practitioners to make a diagnosis of asthma or AR in young children  
16  
17 261 (e.g. under the age of six).  
18  
19

### 20 262 **Implications for future research and practice**

21  
22  
23 263 First of all, could comorbidity data be used to create proxies that could support GPs in identifying atopic  
24  
25  
26 264 children that are not labeled as such? For example, could comorbidity data be incorporated in 'clinical decision  
27  
28 265 support systems' to improve early diagnosis of both atopic and non-atopic disorders. Second of all, how is the  
29  
30 266 quality of life of these atopic children affected by the associated comorbidity? GPs should be aware of the  
31  
32  
33 267 described associations when treating an atopic child, since the quality of life of an atopic child could be  
34  
35 268 improved by paying more attention to diagnosis and treatment of these related disorders. Furthermore, one  
36  
37 269 must be aware that atopic disorders and associated symptoms and diseases may well persist into adulthood.  
38  
39

### 40 270 **Conclusions**

41  
42  
43  
44 271 The present study shows that atopic children have an increased risk of clinically relevant comorbidity, both  
45  
46 272 atopic and non-atopic. General practitioners may not always be fully aware of relevant atopic and non-atopic  
47  
48 273 comorbidity. In children known to have at least one atopic disorder, specific attention is required to avoid  
49  
50  
51 274 possible insufficient treatment and unnecessary loss of quality of life.  
52  
53  
54  
55  
56  
57  
58  
59  
60

## Acknowledgments

The authors thank Petra ten Veen (database specialist, NIVEL) for her help with the selection of eligible patients and Samana Jamsheed for her help with the data extraction.

## Competing Interests

We have read and understood BMJ policy on declaration of interests and declare that we have no competing interests.

## Contributions

Study conception and design: DP, MN, JK, PB, AB

Acquisition of data: DP, MN

Analysis and interpretation of data: DP, MN

Drafting of manuscript: DP

Critical revision: MN, JK, PB, AB

Guarantor: MN, AB

## Funding

This research received no specific grant from any funding agency in the public, commercial or not-for-profit sectors.

1  
2  
3  
4 291 **Data sharing statement**

5  
6  
7  
8 292 Data will be available from the repository of Data Archiving and Networked Services (DANS;

9  
10 293 [www.dans.knaw.nl](http://www.dans.knaw.nl)).

11  
12  
13  
14  
15  
16  
17  
18  
19  
20  
21  
22  
23  
24  
25  
26  
27  
28  
29  
30  
31  
32  
33  
34  
35  
36  
37  
38  
39  
40  
41  
42  
43  
44  
45  
46  
47  
48  
49  
50  
51  
52  
53  
54  
55  
56  
57  
58  
59  
60

For peer review only

## References

1. Van der Linden MW, Van Suijlekom-Smit LWA, Schellevis FG, Van der Wouden JC. Tweede Nationale Studie naar ziekten en verrichtingen in de huisartspraktijk. Culemborg2005. p. 38.
2. Fsadni P, Fsadni C, Fava S, Montefort S. Correlation of worldwide incidence of type 1 diabetes (DiaMond) with prevalence of asthma and atopic eczema (ISAAC). *Clin Respir J.* 2012;6(1):18-25.
3. Huang SW, Hitchcock J. Influence of the TH1/TH2 paradigm: The prevalence of asthma and allergic diseases in patients with type 1 diabetes in the United States. *Pediatr Asthma Allergy Immunol.* 2002;15(4):195-9.
4. Villa-Nova H, Spinola-Castro AM, Garcia FE, Sole D. Prevalence of allergic diseases and/or allergic sensitisation in children and adolescents with type 1 diabetes mellitus. *Allergol Immunopathol.* 2015;43(2):157-61.
5. Chen MH, Su TP, Chen YS, Hsu JW, Huang KL, Chang WH, et al. Asthma and attention-deficit/hyperactivity disorder: a nationwide population-based prospective cohort study. *J Child Psychol Psychiatry.* 2013;54(11):1208-14.
6. Chen MH, Su TP, Chen YS, Hsu JW, Huang KL, Chang WH, et al. Is atopy in early childhood a risk factor for ADHD and ASD? a longitudinal study. *J Psychosom Res.* 2014;77(4):316-21.
7. Schmitt J, Apfelbacher C, Heinrich J, Weidinger S, Romanos M. Association of atopic eczema and attention-deficit/hyperactivity disorder - Meta-analysis of epidemiologic studies. *Z Kinder- Jugendpsychiatr Psychother.* 2013;41(1):35-44.
8. Chen MH, Su TP, Chen YS, Hsu JW, Huang KL, Chang WH, et al. Comorbidity of allergic and autoimmune diseases in patients with autism spectrum disorder: A nationwide population-based study. *Res Autism Spectr Disord.* 2013;7(2):205-12.
9. Jyonouchi H. Autism spectrum disorders and allergy: Observation from a pediatric allergy/immunology clinic. *Expert Rev Clin Immunol.* 2010;6(3):397-411.
10. Lin TY, Lin PY, Su TP, Chen YS, Hsu JW, Huang KL, et al. Autistic spectrum disorder, attention deficit hyperactivity disorder, and allergy: Is there a link? A nationwide study. *Res Autism Spectr Disord.* 2014;8(10):1333-8.
11. Yao TC, Ou LS, Yeh KW, Lee WI, Chen LC, Huang JL. Associations of age, gender, and BMI with prevalence of allergic diseases in children: PATCH study. *J Asthma.* 2011;48(5):503-10.
12. Kreissl S, Radon K, Dressel H, Genuneit J, Kellberger J, Nowak D, et al. Body mass index change and atopic diseases are not always associated in children and adolescents. *Ann Allergy Asthma Immunol.* 2014;113(4):440-4.e1.
13. Weinmayr G, Forastiere F, Buchele G, Jaensch A, Strachan DP, Nagel G. Overweight/obesity and respiratory and allergic disease in children: International study of asthma and allergies in childhood (Isaac) phase two. *PLoS ONE.* 2014;9(12).
14. Juntti H, Kokkonen J, Dunder T, Renko M, Niinimaki A, Uhari M. Association of an early respiratory syncytial virus infection and atopic allergy. *Allergy Eur J Allergy Clin Immunol.* 2003;58(9):878-84.
15. Sidorchuk A, Wickman M, Pershagen G, Lagarde F, Linde A. Cytomegalovirus infection and development of allergic diseases in early childhood: Interaction with EBV infection? *J Allergy Clin Immunol.* 2004;114(6):1434-40.
16. Koponen P, Helminen M, Paassilta M, Luukkaala T, Korppi M. Preschool asthma after bronchiolitis in infancy. *Eur Respir J.* 2012;39(1):76-80.
17. MacIntyre EA, Heinrich J. Otitis media in infancy and the development of asthma and atopic disease. *Curr Allergy Asthma Rep.* 2012;12(6):547-50.

- 1  
2  
3 338 18. Alles R, Parikh A, Hawk L, Darby Y, Romero JN, Scadding G. The prevalence of atopic disorders in  
4 339 children with chronic otitis media with effusion. *Pediatr Allergy Immunol*. 2001;12(2):102-6.  
5 340 19. Caffarelli C, Savini E, Giordano S, Gianlupi G, Cavagni G. Atopy in children with otitis media with  
6 341 effusion. *Clin Exp Allergy*. 1998;28(5):591-6.  
7 342 20. Kwon C, Lee HY, Kim MG, Boo SH, Yeo SG. Allergic diseases in children with otitis media with effusion.  
8 343 *Int J Pediatr Otorhinolaryngol*. 2013;77(2):158-61.  
9 344 21. Nielen MMJ, Spronk I, Davids R, Zwaanswijk M, Verheij RA, JC K. Accountability incidence and  
10 345 prevalence of health problems in the Dutch general practice in 2012. Nivel; 2012 [cited 2015 20-4]; Available  
11 346 from: [www.nivel.nl/node/3619](http://www.nivel.nl/node/3619).  
12 347 22. Lamberts H, Wood M. The birth of the International Classification of Primary Care (ICPC). Serendipity at  
13 348 the border of Lac Lemman. *Family practice*. 2002;19(5):433-5. Epub 2002/10/03.  
14 349 23. Hupkens C, Swinkels H. Ongeveer drie kwart bezoekt jaarlijks huisarts en tandarts. CBS; 2013 [updated  
15 350 2-7-2013 09.3020-10-2016]; Available from: [https://www.cbs.nl/nl-nl/nieuws/2013/27/ongeveer-drie-kwart-](https://www.cbs.nl/nl-nl/nieuws/2013/27/ongeveer-drie-kwart-bezoekt-jaarlijks-huisarts-en-tandarts)  
16 351 [bezoekt-jaarlijks-huisarts-en-tandarts](https://www.cbs.nl/nl-nl/nieuws/2013/27/ongeveer-drie-kwart-bezoekt-jaarlijks-huisarts-en-tandarts).  
17 352 24. Pols DHJ, Nielen MMJ, Korevaar JC, Bindels PJ, Bohnen AM. Reliably estimating prevalences of atopic  
18 353 children: an epidemiological study in an extensive and representative primary care database. *NPJ Prim Care*  
19 354 *Respir Med* (in press). 2017.  
20 355 25. Pols DH, Wartna JB, van Alphen EI, Moed H, Rasenberg N, Bindels PJ, et al. Interrelationships between  
21 356 Atopic Disorders in Children: A Meta-Analysis Based on ISAAC Questionnaires. *PLoS One*. 2015;10(7):e0131869.  
22 357 26. Miyagaki T, Sugaya M. Recent advances in atopic dermatitis and psoriasis: genetic background, barrier  
23 358 function, and therapeutic targets. *J Dermatol Sci*. 2015;78(2):89-94. Epub 2015/03/17.  
24 359 27. Deliu M, Belgrave D, Simpson A, Murray CS, Kerry G, Custovic A. Impact of rhinitis on asthma severity in  
25 360 school-age children. *Allergy Eur J Allergy Clin Immunol*. 2014;69(11):1515-21.  
26 361 28. Powell N, Huntley B, Beech T, Knight W, Knight H, Corrigan CJ. Increased prevalence of gastrointestinal  
27 362 symptoms in patients with allergic disease. *Postgrad Med J*. 2007;83(977):182-6.  
28 363 29. Cianferoni A, Spergel J. Eosinophilic Esophagitis: A Comprehensive Review. *Clinical reviews in allergy &*  
29 364 *immunology*. 2016;50(2):159-74. Epub 2015/07/22.  
30 365 30. Kappelman M, Galanko J, Porter C, Sandler R. Young faculty clinical investigator award association of  
31 366 pediatric inflammatory bowel disease with other immune-mediated diseases. *J Pediatr Gastroenterol Nutr*.  
32 367 2009;49:E67-E8.  
33 368 31. Kappelman MD, Galanko JA, Porter CQ, Sandler RS. Association of paediatric inflammatory bowel  
34 369 disease with other immune-mediated diseases. *Arch Dis Child*. 2011;96(11):1042-6.  
35 370 32. Linabery AM, Jurek AM, Duval S, Ross JA. The association between atopy and childhood/adolescent  
36 371 leukemia: A meta-analysis. *Am J Epidemiol*. 2010;171(7):749-64.  
37 372 33. Hughes AM, Lightfoot T, Simpson J, Ansell P, McKinney PA, Kinsey SE, et al. Allergy and risk of childhood  
38 373 leukaemia: Results from the UKCCS. *Int J Cancer*. 2007;121(4):819-24.  
39 374 34. Tzeng ST, Hsu SG, Fu LS, Chi CS. Prevalence of atopy in children with type 1 diabetes mellitus in central  
40 375 Taiwan. *J Microbiol Immunol Infect*. 2007;40(1):74-8.  
41 376 35. Meerwaldt R, Odink RJ, Landaeta R, Aarts F, Brunekreef B, Gerritsen J, et al. A lower prevalence of  
42 377 atopy symptoms in children with type 1 diabetes mellitus. *Clin Exp Allergy*. 2002;32(2):254-5.  
43 378 36. Dirven-Meijer PC, De Kock CA, Nonneman MMG, Van Sleuwen D, De Witt-de Jong AWF, Burgers JS, et  
44 379 al. NHG-Standaard Eczem. *Huisarts Wet* 2014;57(5):240-52.  
45 380 37. Flohr C, Johansson SG, Wahlgren CF, Williams H. How atopic is atopic dermatitis? *J Allergy Clin*  
46 381 *Immunol*. 2004;114(1):150-8. Epub 2004/07/09.  
47 382 38. Sachs APE, Berger MY, Lucassen PLBJ, Van der Wal J, Van Balen JAM, Verduijn MM. NHG-Standaard  
48 383 Allergische en niet-allergische rhinitis (Eerste herziening) *Huisarts Wet* 2006;49(5):254-65.  
49 384 39. Bindels PJE, Van de Griendt EJ, Grol MH, Van Hensbergen W, Steenkamer TA, Uijen JHJM, et al. NHG-  
50 385 *Standaard Astma bij kinderen (Derde herziening)*. *Huisarts Wet* 2014;57(2):70-80.  
51  
52  
53  
54  
55  
56  
57  
58  
59  
60

1  
2  
3  
4  
5  
6  
7  
8  
9  
10  
11  
12  
13  
14  
15  
16  
17  
18  
19  
20  
21  
22  
23  
24  
25  
26  
27  
28  
29  
30  
31  
32  
33  
34  
35  
36  
37  
38  
39  
40  
41  
42  
43  
44  
45  
46  
47  
48  
49  
50  
51  
52  
53  
54  
55  
56  
57  
58  
59  
60

386 40. Eysink PE, ter Riet G, Aalberse RC, van Aalderen WM, Roos CM, van der Zee JS, et al. Accuracy of  
387 specific IgE in the prediction of asthma: development of a scoring formula for general practice. The British  
388 journal of general practice : the journal of the Royal College of General Practitioners. 2005;55(511):125-31.  
389 Epub 2005/02/22.

390  
391

For peer review only

## Figure legends

**Table 1.** General characteristics of the total study population

**Table 2.** Significantly ( $p \leq 0.001$ ) associated comorbidity in children diagnosed with only atopic eczema (Ec) and at least three year follow-up versus controls (non-atopic children) (n=31,060)

**Table 3.** Significantly ( $p \leq 0.001$ ) associated comorbidity in children diagnosed with only asthma (As) and at least three year follow-up versus controls (non-atopic children) (n=15,774)

**Table 4.** Significantly ( $p \leq 0.001$ ) associated comorbidity in children diagnosed with only allergic rhinitis (AR) and at least three year follow-up versus controls (non-atopic children) (n=13,670)

**Table 5.** Significantly ( $p \leq 0.001$ ) associated comorbidity in children diagnosed with Atopic Triad (AT) and at least three year follow-up versus controls (non-atopic children) (n= 1,118)



1  
2  
3  
4  
5  
6  
7  
8  
9  
10  
11  
12  
13  
14  
15  
16  
17  
18  
19  
20  
21  
22  
23  
24  
25  
26  
27  
28  
29  
30  
31  
32  
33  
34  
35  
36  
37  
38  
39  
40  
41  
42  
43  
44  
45  
46  
47  
48  
49  
50  
51  
52  
53  
54  
55  
56  
57  
58  
59  
60

403 Table 1. General characteristics of the total study population

|                        | n      | Age in years<br>(SD) | Male  |
|------------------------|--------|----------------------|-------|
| Only atopic eczema     | 15,530 | 8.7 (4.5)            | 48.2% |
| Only asthma            | 7,887  | 10.7 (4.5)           | 59.0% |
| Only allergic rhinitis | 6,835  | 13.5 (3.5)           | 57.8% |
| Atopic triad           | 559    | 11.6 (4.0)           | 61.4% |

404 NB. Children in the first three groups had **only one** of the three atopic disorders: i.e. they had the disorder  
405 mentioned, but none of the **other** disorders, whereas children in the Atopic triad group had **all three** disorders.

Table 2. Significantly ( $p \leq 0.001$ ) associated comorbidity in children diagnosed with only atopic eczema (Ec) and at least three year follow-up versus controls (non-atopic children) ( $n=31,060$ ).

| ICPC                                                   | OR          | 95% CI             | Prevalence  |             | OR sex |      | OR age |      |       | Description ICPC codes                  |
|--------------------------------------------------------|-------------|--------------------|-------------|-------------|--------|------|--------|------|-------|-----------------------------------------|
|                                                        |             |                    | Ec          | No Ec       | boy    | girl | 0-6    | 7-12 | 13-18 |                                         |
| <b>Skin-related diseases and symptoms</b>              |             |                    |             |             |        |      |        |      |       |                                         |
| S03                                                    | 1.15        | 1.06 – 1.26        | 7.85        | 6.88        |        |      |        |      |       | Warts                                   |
| S06                                                    | 1.51        | 1.25 – 1.82        | 1.76        | 1.18        | 1.11   | 2.02 | 1.29   | 1.54 | 2.30  | Rash localized <sup>1,2</sup>           |
| S99                                                    | 1.57        | 1.24 – 2.00        | 1.12        | 0.71        |        |      |        |      |       | Skin disease, other                     |
| S02                                                    | 1.71        | 1.31 – 2.23        | 0.97        | 0.57        |        |      |        |      |       | Pruritus                                |
| S84                                                    | 1.71        | 1.54 – 1.90        | 6.23        | 3.75        |        |      | 1.54   | 1.78 | 2.72  | Impetigo <sup>2</sup>                   |
| S04                                                    | 1.76        | 1.30 – 2.39        | 0.73        | 0.42        |        |      |        |      |       | Lump/swelling localized                 |
| S74                                                    | 1.76        | 1.54 – 2.00        | 4.20        | 2.44        |        |      |        |      |       | Dermatophytosis                         |
| S98                                                    | 1.77        | 1.50 – 2.09        | 2.49        | 1.42        |        |      |        |      |       | Urticaria                               |
| S21                                                    | 1.89        | 1.49 – 2.40        | 1.26        | 0.67        |        |      |        |      |       | Skin texture symptom/complaint          |
| S95                                                    | 1.92        | 1.69 – 2.19        | 4.44        | 2.38        |        |      |        |      |       | Molluscum contagiosum                   |
| S86                                                    | 2.31        | 1.87 – 2.84        | 1.89        | 0.83        |        |      |        |      |       | Dermatitis seborrhoeic                  |
| S91                                                    | 3.36        | 2.23 – 5.06        | 0.64        | 0.19        |        |      |        |      |       | Psoriasis                               |
| <b>Airway-related diseases and symptoms</b>            |             |                    |             |             |        |      |        |      |       |                                         |
| R05                                                    | 1.29        | 1.17 – 1.43        | 5.94        | 4.67        |        |      |        |      |       | Cough                                   |
| R74                                                    | 1.33        | 1.23 – 1.43        | 10.42       | 8.13        |        |      |        |      |       | Upper respiratory infection acute       |
| R78                                                    | 1.49        | 1.22 – 1.80        | 1.66        | 1.13        |        |      |        |      |       | Acute bronchitis/bronchiolitis          |
| R04                                                    | <b>1.55</b> | <b>0.97 – 2.48</b> | <b>0.29</b> | <b>0.19</b> | 0.91   | 3.58 |        |      |       | Breathing problem, other <sup>1</sup>   |
| R03                                                    | 1.95        | 1.30 – 2.92        | 0.45        | 0.23        |        |      |        |      |       | Wheezing                                |
| <b>Ear-nose-throat-related diseases and symptoms</b>   |             |                    |             |             |        |      |        |      |       |                                         |
| H71                                                    | 1.20        | 1.09 – 1.31        | 7.46        | 6.35        |        |      |        |      |       | Acute otitis media/myringitis           |
| H72                                                    | 1.40        | 1.21 – 1.62        | 2.92        | 2.11        |        |      |        |      |       | Serous otitis media                     |
| H01                                                    | 1.43        | 1.24 – 1.65        | 3.01        | 2.13        |        |      |        |      |       | Ear pain/earache                        |
| H04                                                    | 1.47        | 1.17 – 1.86        | 1.13        | 0.77        |        |      |        |      |       | Ear discharge                           |
| R21                                                    | 1.50        | 1.27 – 1.78        | 2.13        | 1.43        |        |      |        |      |       | Throat symptom/complaint                |
| H70                                                    | 1.56        | 1.27 – 1.90        | 1.58        | 1.02        |        |      |        |      |       | Otitis externa                          |
| R07                                                    | 1.95        | 1.32 – 2.89        | 0.48        | 0.24        |        |      |        |      |       | Sneezing/nasal congestion               |
| <b>Gastro-intestinal-related diseases and symptoms</b> |             |                    |             |             |        |      |        |      |       |                                         |
| D01                                                    | 1.27        | 1.12 – 1.45        | 3.61        | 2.85        |        |      |        |      |       | Abdominal pain/cramps general           |
| D12                                                    | 1.32        | 1.19 – 1.47        | 5.29        | 4.07        |        |      |        |      |       | Constipation                            |
| D87                                                    | <b>1.48</b> | <b>0.87 – 2.51</b> | <b>0.22</b> | <b>0.15</b> | 0.69   | 3.29 |        |      |       | Stomach function disorder <sup>1</sup>  |
| D99                                                    | 2.28        | 1.51 – 3.44        | 0.48        | 0.21        |        |      |        |      |       | Disease digestive system. other         |
| <b>Musculoskeletal</b>                                 |             |                    |             |             |        |      |        |      |       |                                         |
| L17                                                    | 1.30        | 1.15 – 1.48        | 3.50        | 2.71        |        |      |        |      |       | Foot/toe symptom/complaint              |
| L98                                                    | 1.39        | 1.20 – 1.60        | 2.90        | 2.11        |        |      |        |      |       | Acquired deformity of limb              |
| <b>Miscellaneous</b>                                   |             |                    |             |             |        |      |        |      |       |                                         |
| A04                                                    | 1.25        | 1.09 – 1.44        | 3.07        | 2.47        |        |      |        |      |       | Weakness/tiredness general              |
| S12                                                    | 1.41        | 1.19 – 1.66        | 2.24        | 1.60        |        |      |        |      |       | Insect bite / sting                     |
| F72                                                    | 1.53        | 1.22 – 1.93        | 1.20        | 0.79        |        |      | 0.96   | 2.79 | 1.76  | Blepharitis/stye/chalazion <sup>2</sup> |
| F70                                                    | 1.53        | 1.29 – 1.81        | 2.18        | 1.44        |        |      |        |      |       | Conjunctivitis infectious               |
| Y81                                                    | 1.83        | 1.47 – 2.72        | 1.49        | 0.83        |        |      |        |      |       | Phimosis/redundant prepuce              |
| F71                                                    | 1.99        | 1.59 – 2.49        | 1.45        | 0.73        |        |      |        |      |       | Conjunctivitis allergic                 |
| A12                                                    | 3.11        | 2.62 – 3.69        | 3.42        | 1.13        |        |      |        |      |       | Allergy                                 |

1. significant ( $p \leq 0.01$ ) influence of gender; 2. significant ( $p \leq 0.01$ ) influence of age; # OR could not be calculated; **Italics**: Overall model not significant

Table 3. Significantly ( $p \leq 0.001$ ) associated comorbidity in children diagnosed with only asthma (As) and at least three year follow-up versus controls (non-atopic children) ( $n=15,774$ )

| ICPC                                                   | OR          | 95% CI             | Prevalence  |             | OR sex |      | OR age |      |       | Description ICPC codes                      |
|--------------------------------------------------------|-------------|--------------------|-------------|-------------|--------|------|--------|------|-------|---------------------------------------------|
|                                                        |             |                    | As          | No As       | boy    | girl | 0-6    | 7-12 | 13-18 |                                             |
| <b>Skin-related diseases and symptoms</b>              |             |                    |             |             |        |      |        |      |       |                                             |
| S98                                                    | 2.10        | 1.61 – 2.73        | 2.21        | 1.07        |        |      |        |      |       | Urticaria                                   |
| <b>Airway-related diseases and symptoms</b>            |             |                    |             |             |        |      |        |      |       |                                             |
| R05                                                    | 2.14        | 1.86 – 2.46        | 7.99        | 3.93        |        |      |        |      |       | Cough                                       |
| R77                                                    | 2.34        | 1.54 – 3.56        | 0.94        | 0.41        |        |      |        |      |       | Laryngitis/tracheitis acute                 |
| R74                                                    | 2.35        | 2.09 – 2.64        | 12.34       | 5.78        |        |      |        |      |       | Upper respiratory infection                 |
| R81                                                    | 4.04        | 3.03 – 5.37        | 2.97        | 0.76        |        |      |        |      |       | Pneumonia                                   |
| R78                                                    | 4.80        | 3.78 – 6.11        | 4.79        | 1.05        |        |      | 3.74   | 5.63 | 8.09  | Acute bronchitis/bronchiolitis <sup>2</sup> |
| R91                                                    | 5.66        | 3.14–10.23         | 0.93        | 0.16        |        |      |        |      |       | Chronic bronchitis                          |
| R02                                                    | 7.74        | 5.05–11.87         | 2.31        | 0.30        |        |      |        |      |       | Shortness of breath/dyspnoea                |
| R03                                                    | 10.30       | 4.73–22.42         | 0.90        | 0.09        |        |      |        |      |       | Wheezing                                    |
| <b>Ear-nose-throat-related diseases and symptoms</b>   |             |                    |             |             |        |      |        |      |       |                                             |
| H76                                                    | <b>0.86</b> | <b>0.40 – 1.85</b> | <b>0.15</b> | <b>0.18</b> | 2.51   | 0.20 |        |      |       | Foreign body in ear <sup>1</sup>            |
| H01                                                    | 1.45        | 1.16 – 1.81        | 2.46        | 1.71        |        |      |        |      |       | Ear pain/earache                            |
| H71                                                    | 1.52        | 1.32 – 1.76        | 6.44        | 4.4         |        |      |        |      |       | Acute otitis media/myringitis               |
| H70                                                    | 1.60        | 1.22 – 2.08        | 1.79        | 1.13        |        |      |        |      |       | Otitis externa                              |
| R75                                                    | 1.90        | 1.32 – 2.75        | 1.05        | 0.56        |        |      |        |      |       | Sinusitis acute/chronic                     |
| <b>Gastro-intestinal-related diseases and symptoms</b> |             |                    |             |             |        |      |        |      |       |                                             |
| D89                                                    | <b>0.76</b> | <b>0.37 – 1.57</b> | <b>0.16</b> | <b>0.22</b> | 0.27   | 4.52 |        |      |       | Inguinal hernia <sup>1</sup>                |
| D01                                                    | 1.40        | 1.16 – 1.69        | 3.32        | 2.40        |        |      |        |      |       | Abdominal pain/cramps general               |
| D06                                                    | 1.43        | 1.15 – 1.77        | 2.59        | 1.83        |        |      |        |      |       | Abdominal pain localized other              |
| D12                                                    | 1.44        | 1.22 – 1.70        | 4.43        | 3.12        |        |      |        |      |       | Constipation                                |
| D73                                                    | 1.60        | 1.25 – 2.05        | 2.10        | 1.33        |        |      |        |      |       | Gastroenteritis, infection                  |
| D10                                                    | 2.02        | 1.37 – 2.97        | 0.99        | 0.49        |        |      |        |      |       | Vomiting                                    |
| D99                                                    | 2.70        | 1.52 – 4.79        | 0.55        | 0.20        |        |      |        |      |       | Disease digestive system, other             |
| <b>Musculoskeletal</b>                                 |             |                    |             |             |        |      |        |      |       |                                             |
| L15                                                    | <b>1.11</b> | <b>0.90 – 1.37</b> | <b>2.42</b> | <b>2.18</b> |        |      | 1.34   | 1.49 | 0.97  | Knee symptom/complaint <sup>1</sup>         |
| L12                                                    | <b>1.37</b> | <b>1.09 – 1.71</b> | <b>2.27</b> | <b>1.67</b> | 1.00   | 2.13 |        |      |       | Hand symptom/complaint <sup>1</sup>         |
| L98                                                    | 1.40        | 1.16 – 1.68        | 3.54        | 2.56        |        |      |        |      |       | Acquired deformity of limb                  |
| L99                                                    | 1.52        | 1.22 – 1.89        | 2.66        | 1.78        |        |      |        |      |       | Musculoskeletal disease, other              |
| L11                                                    | 1.98        | 1.48 – 2.65        | 1.71        | 0.87        |        |      |        |      |       | Wrist symptom/complaint                     |
| <b>Miscellaneous</b>                                   |             |                    |             |             |        |      |        |      |       |                                             |
| P21                                                    | 1.34        | 1.13 – 1.58        | 4.18        | 3.17        |        |      |        |      |       | ADHD                                        |
| A04                                                    | 1.39        | 1.17 – 1.65        | 4.04        | 2.97        |        |      |        |      |       | Weakness/tiredness general                  |
| N01                                                    | 1.51        | 1.21 – 1.89        | 2.49        | 1.66        |        |      |        |      |       | Headache                                    |
| F70                                                    | 1.72        | 1.31 – 2.27        | 1.78        | 1.04        |        |      |        |      |       | Conjunctivitis infectious                   |
| T10                                                    | 1.82        | 1.35 – 2.44        | 1.60        | 0.89        |        |      |        |      |       | Growth delay                                |
| T83                                                    | 2.09        | 1.41 – 3.10        | 0.98        | 0.47        |        |      |        |      |       | Overweight                                  |
| T82                                                    | 2.47        | 1.50 – 4.05        | 0.68        | 0.28        |        |      |        |      |       | Obesity                                     |
| F71                                                    | 2.55        | 1.85 – 3.49        | 1.72        | 0.68        |        |      |        |      |       | Conjunctivitis allergic                     |
| A12                                                    | 3.40        | 2.74 – 4.23        | 4.55        | 1.38        |        |      |        |      |       | Allergy                                     |

1. significant ( $p \leq 0.01$ ) influence of gender; 2. significant ( $p \leq 0.01$ ) influence of age; # OR could not be calculated; **Italics**: Overall model not significant

Table 4. Significantly ( $p \leq 0.001$ ) associated comorbidity in children diagnosed with only allergic rhinitis (AR) and at least three year follow-up versus controls (non-atopic children) ( $n=13,670$ )

| ICPC                                                   | OR          | 95% CI             | Prevalence  |             | OR sex |      | OR age |      |       | Description ICPC codes                          |
|--------------------------------------------------------|-------------|--------------------|-------------|-------------|--------|------|--------|------|-------|-------------------------------------------------|
|                                                        |             |                    | AR          | No AR       | boy    | girl | 0-6    | 7-12 | 13-18 |                                                 |
| <b>Skin-related diseases and symptoms</b>              |             |                    |             |             |        |      |        |      |       |                                                 |
| A76                                                    | <b>0.86</b> | <b>0.47 – 1.60</b> | <b>0.28</b> | <b>0.32</b> |        |      | 0.32   | 0.64 | 4.51  | Viral exanthem other                            |
| S03                                                    | 1.26        | 1.10 – 1.43        | 7.65        | 6.20        |        |      |        |      |       | Warts                                           |
| S74                                                    | 1.39        | 1.15 – 1.68        | 3.85        | 2.79        |        |      |        |      |       | Dermatophytosis                                 |
| S82                                                    | 1.39        | 1.15 – 1.67        | 3.99        | 2.91        |        |      |        |      |       | Naevus/mole                                     |
| S84                                                    | 1.71        | 1.35 – 2.15        | 2.87        | 1.71        |        |      |        |      |       | Impetigo                                        |
| S98                                                    | 1.71        | 1.31 – 2.23        | 2.15        | 1.27        |        |      |        |      |       | Urticaria                                       |
| S86                                                    | 1.86        | 1.38 – 2.53        | 1.76        | 0.95        |        |      |        |      |       | Dermatitis seborrheic                           |
| S02                                                    | 2.21        | 1.44 – 3.38        | 0.99        | 0.45        |        |      |        |      |       | Pruritus                                        |
| <b>Airway-related diseases and symptoms</b>            |             |                    |             |             |        |      |        |      |       |                                                 |
| R05                                                    | 1.89        | 1.58 – 2.25        | 5.24        | 2.85        |        |      |        |      |       | Cough                                           |
| R74                                                    | 1.92        | 1.66 – 2.23        | 8.00        | 4.35        |        |      |        |      |       | Upper respiratory infection acute               |
| R78                                                    | 2.32        | 1.60 – 3.37        | 1.35        | 0.59        |        |      |        |      |       | Acute bronchitis/bronchiolitis                  |
| R02                                                    | 2.67        | 1.74 – 4.11        | 1.13        | 0.42        |        |      |        |      |       | Shortness of breath/dyspnoe                     |
| R80                                                    | 3.89        | 1.79 – 8.47        | 0.45        | 0.12        |        |      |        |      |       | Influenza                                       |
| R03                                                    | 4.30        | 1.89 – 9.80        | 0.44        | 0.10        |        |      |        |      |       | Wheezing                                        |
| <b>Ear-nose-throat-related diseases and symptoms</b>   |             |                    |             |             |        |      |        |      |       |                                                 |
| R21                                                    | 1.48        | 1.20 – 1.84        | 3.13        | 2.14        |        |      |        |      |       | Throat symptom/complaint                        |
| H01                                                    | 1.87        | 1.36 – 2.56        | 1.62        | 0.88        |        |      |        |      |       | Ear pain/earache                                |
| R90                                                    | 1.92        | 1.34 – 2.74        | 1.30        | 0.69        |        |      | 3.22   | 2.80 | 1.04  | Hypertrophy tonsils/adenoids <sup>2</sup>       |
| R75                                                    | 1.95        | 1.45 – 2.63        | 1.89        | 0.98        |        |      |        |      |       | Sinusitis acute/chronic                         |
| R08                                                    | 2.62        | 1.72 – 4.00        | 1.14        | 0.44        |        |      |        |      |       | Nose symptom/complaint other                    |
| R07                                                    | 3.93        | 2.57 – 6.01        | 1.54        | 0.40        |        |      |        |      |       | Sneezing/nasal congestion                       |
| <b>Gastro-intestinal-related diseases and symptoms</b> |             |                    |             |             |        |      |        |      |       |                                                 |
| D12                                                    | 1.50        | 1.23 – 1.82        | 3.79        | 2.57        |        |      |        |      |       | Constipation                                    |
| D06                                                    | 1.76        | 1.39 – 2.22        | 2.90        | 1.67        |        |      |        |      |       | Abdominal pain localized other                  |
| D73                                                    | 1.96        | 1.42 – 2.71        | 1.59        | 0.82        | 1.29   | 3.39 |        |      |       | Gastroenteritis presumed infection <sup>1</sup> |
| <b>Musculoskeletal</b>                                 |             |                    |             |             |        |      |        |      |       |                                                 |
| L98                                                    | 1.36        | 1.15 – 1.62        | 4.54        | 3.37        |        |      |        |      |       | Acquired deformity of limb                      |
| L17                                                    | 1.42        | 1.19 – 1.70        | 4.40        | 3.15        |        |      |        |      |       | Foot/toe symptom/complaint                      |
| L13                                                    | 2.80        | 1.66 – 4.74        | 0.78        | 0.28        |        |      |        |      |       | Hip symptom/complaint                           |
| <b>Miscellaneous</b>                                   |             |                    |             |             |        |      |        |      |       |                                                 |
| N19                                                    | <b>1.18</b> | <b>0.85 – 1.65</b> | <b>1.17</b> | <b>0.99</b> | 0.89   | 2.43 |        |      |       | Speech disorder                                 |
| N01                                                    | 1.45        | 1.18 – 1.78        | 3.29        | 2.30        |        |      |        |      |       | Headache                                        |
| P24                                                    | 1.45        | 1.18 – 1.78        | 3.37        | 2.37        |        |      |        |      |       | Specific learning problem                       |
| A04                                                    | 1.58        | 1.35 – 1.85        | 6.10        | 3.96        |        |      |        |      |       | Weakness/tiredness general                      |
| F70                                                    | 1.73        | 1.28 – 2.32        | 1.76        | 1.02        |        |      |        |      |       | Conjunctivitis infectious                       |
| S12                                                    | 1.92        | 1.40 – 2.63        | 1.67        | 0.88        |        |      |        |      |       | Insect bite/sting                               |
| F72                                                    | 1.95        | 1.36 – 2.79        | 1.27        | 0.66        | 1.21   | 3.29 |        |      |       | Blepharitis/stye/chalazion <sup>1</sup>         |
| A12                                                    | 4.02        | 3.15 – 5.13        | 4.70        | 1.21        |        |      |        |      |       | Allergy                                         |
| F71                                                    | 5.44        | 4.08 – 7.25        | 4.29        | 0.82        |        |      |        |      |       | Conjunctivitis allergic                         |

1. significant ( $p \leq 0.01$ ) influence of gender; 2. significant ( $p \leq 0.01$ ) influence of age; # OR could not be calculated; **Italics**: Overall model not significant

1  
2  
3  
4  
5  
6  
7  
8  
9  
10  
11  
12  
13  
14  
15  
16  
17  
18  
19  
20  
21  
22  
23  
24  
25  
26  
27  
28  
29  
30  
31  
32  
33  
34  
35  
36  
37  
38  
39  
40  
41  
42  
43  
44  
45  
46  
47  
48  
49  
50  
51  
52  
53  
54  
55  
56  
57  
58  
59  
60

420 Table 5. Significantly ( $p \leq 0.001$ ) associated comorbidity in children diagnosed with Atopic Triad (AT) and at least  
421 three year follow-up versus controls (non-atopic children) (n= 1,118)

| ICPC | OR    | 95% CI |         | Prevalence |             | Description ICPC codes            |
|------|-------|--------|---------|------------|-------------|-----------------------------------|
|      |       |        |         | A. triad   | No A. triad |                                   |
| R05  | 2.42  | 1.43   | - 4.10  | 8.59       | 3.76        | Cough                             |
| L17  | 3.25  | 1.63   | - 6.50  | 6.08       | 1.97        | Foot/toe symptom/complaint        |
| R74  | 3.75  | 2.33   | - 6.04  | 14.13      | 4.29        | Upper respiratory infection acute |
| F71  | 6.79  | 2.35   | - 19.60 | 4.65       | 0.72        | Conjunctivitis allergic           |
| A12  | 17.83 | 7.15   | - 44.43 | 13.77      | 0.89        | Allergy                           |

For peer review only

## Appendix 1

| ICPC codes | Description                          |
|------------|--------------------------------------|
| A03        | Fever                                |
| A04        | Weakness/tiredness general           |
| A12        | Allergic reaction                    |
| A15        | Excessive crying infant              |
| A16        | Irritable infant                     |
| A70        | Tuberculosis                         |
| A71        | Measles                              |
| A72        | Chickenpox                           |
| A73        | Malaria                              |
| A74        | Rubella                              |
| A75        | Infectious mononucleosis             |
| A76        | Viral exanthem other                 |
| A77        | Viral disease other/NOS              |
| A78        | Infectious disease other/NOS         |
| A79        | Malignancy NOS                       |
| A84        | Poisoning by medical agent           |
| A85        | Adverse effect medical agent         |
| A86        | Toxic effect non-medicinal substance |
| A87        | Complication of medical treatment    |
| A88        | Adverse effect physical factor       |
| A90        | Congenital anomaly OS/multiple       |
| A92        | Allergy/allergic reaction NOS        |
| A93        | Premature newborn                    |
| A94        | Perinatal morbidity other            |
| A95        | Perinatal mortality                  |
| A96        | Death                                |
| B02        | Lymph gland(s) enlarged/painful      |
| B70        | Lymphadenitis acute                  |
| B71        | Lymphadenitis non-specific           |
| B72        | Hodgkin's disease/lymphoma           |
| B73        | Leukaemia                            |
| B74        | Malignant neoplasm blood other       |
| B75        | Benign/unspecified neoplasm blood    |
| B78        | Hereditary haemolytic anaemia        |
| B79        | Congen.anom. blood/lymph other       |
| B80        | Iron deficiency anaemia              |
| B81        | Anaemia, Vitamin B12/folate def.     |
| B82        | Anaemia other/unspecified            |
| B83        | Purpura/coagulation defect           |

|    |     |                                      |
|----|-----|--------------------------------------|
| 1  |     |                                      |
| 2  |     |                                      |
| 3  | B84 | Unexplained abnormal white cells     |
| 4  | B87 | Splenomegaly                         |
| 5  | B90 | HIV-infection/aids                   |
| 6  | D01 | Abdominal pain/cramps general        |
| 7  | D02 | Abdominal pain epigastric            |
| 8  | D03 | Heartburn                            |
| 9  | D04 | Rectal/anal pain                     |
| 10 | D05 | Perianal itching                     |
| 11 | D06 | Abdominal pain localized other       |
| 12 | D07 | Dyspepsia/indigestion                |
| 13 | D08 | Flatulence/gas/belching              |
| 14 | D09 | Nausea                               |
| 15 | D10 | Vomiting                             |
| 16 | D11 | Diarrhoea                            |
| 17 | D12 | Constipation                         |
| 18 | D13 | Jaundice                             |
| 19 | D22 | Parasites                            |
| 20 | D70 | Gastrointestinal infection           |
| 21 | D71 | Mumps                                |
| 22 | D72 | Viral hepatitis                      |
| 23 | D73 | Gastroenteritis presumed infection   |
| 24 | D74 | Malignant neoplasm stomach           |
| 25 | D75 | Malignant neoplasm colon/rectum      |
| 26 | D76 | Malignant neoplasm pancreas          |
| 27 | D77 | Malig. neoplasm digest other/NOS     |
| 28 | D78 | Neoplasm digest benign/uncertain     |
| 29 | D79 | Foreign body digestive system        |
| 30 | D81 | Congen. anomaly digestive system     |
| 31 | D83 | Mouth/tongue/lip disease             |
| 32 | D84 | Oesophagus disease                   |
| 33 | D85 | Duodenal ulcer                       |
| 34 | D86 | Peptic ulcer other                   |
| 35 | D87 | Stomach function disorder            |
| 36 | D88 | Appendicitis                         |
| 37 | D89 | Inguinal hernia                      |
| 38 | D90 | Hiatus hernia                        |
| 39 | D91 | Abdominal hernia other               |
| 40 | D92 | Diverticular disease                 |
| 41 | D93 | Irritable bowel syndrome             |
| 42 | D94 | Chronic enteritis/ulcerative colitis |
| 43 | D95 | Anal fissure/perianal abscess        |
| 44 | D96 | Worms/other parasites                |
| 45 | D97 | Liver disease NOS                    |
| 46 |     |                                      |
| 47 |     |                                      |
| 48 |     |                                      |
| 49 |     |                                      |
| 50 |     |                                      |
| 51 |     |                                      |
| 52 |     |                                      |
| 53 |     |                                      |
| 54 |     |                                      |
| 55 |     |                                      |
| 56 |     |                                      |
| 57 |     |                                      |
| 58 |     |                                      |
| 59 |     |                                      |
| 60 |     |                                      |

|    |     |                                  |
|----|-----|----------------------------------|
| 1  |     |                                  |
| 2  |     |                                  |
| 3  |     |                                  |
| 4  | D98 | Cholecystitis/cholelithiasis     |
| 5  | D99 | Disease digestive system, other  |
| 6  | F01 | Eye pain                         |
| 7  | F02 | Red eye                          |
| 8  | F03 | Eye discharge                    |
| 9  | F04 | Visual floaters/spots            |
| 10 | F05 | Visual disturbance other         |
| 11 | F70 | Conjunctivitis infectious        |
| 12 | F71 | Conjunctivitis allergic          |
| 13 | F72 | Blepharitis/stye/chalazion       |
| 14 | F73 | Eye infection/inflammation other |
| 15 | F74 | Neoplasm of eye/adnexa           |
| 16 | F75 | Contusion/haemorrhage eye        |
| 17 | F76 | Foreign body in eye              |
| 18 | F80 | Blocked lacrimal duct of infant  |
| 19 | F81 | Congenital anomaly eye other     |
| 20 | F82 | Detached retina                  |
| 21 | F83 | Retinopathy                      |
| 22 | F84 | Macular degeneration             |
| 23 | F85 | Corneal ulcer                    |
| 24 | F86 | Trachoma                         |
| 25 | F91 | Refractive error                 |
| 26 | F92 | Cataract                         |
| 27 | F93 | Glaucoma                         |
| 28 | F94 | Blindness                        |
| 29 | F95 | Strabismus                       |
| 30 | F99 | Eye/adnexa disease, other        |
| 31 | H01 | Ear pain/earache                 |
| 32 | H02 | Hearing complaint                |
| 33 | H03 | Tinnitus, ringing/buzzing ear    |
| 34 | H04 | Ear discharge                    |
| 35 | H05 | Bleeding ear                     |
| 36 | H70 | Otitis externa                   |
| 37 | H71 | Acute otitis media/myringitis    |
| 38 | H72 | Serous otitis media              |
| 39 | H73 | Eustachian salpingitis           |
| 40 | H74 | Chronic otitis media             |
| 41 | H75 | Neoplasm of ear                  |
| 42 | H76 | Foreign body in ear              |
| 43 | H77 | Perforation ear drum             |
| 44 | H80 | Congenital anomaly of ear        |
| 45 | H81 | Excessive ear wax                |
| 46 | H82 | Vertiginous syndrome             |
| 47 |     |                                  |
| 48 |     |                                  |
| 49 |     |                                  |
| 50 |     |                                  |
| 51 |     |                                  |
| 52 |     |                                  |
| 53 |     |                                  |
| 54 |     |                                  |
| 55 |     |                                  |
| 56 |     |                                  |
| 57 |     |                                  |
| 58 |     |                                  |
| 59 |     |                                  |
| 60 |     |                                  |



|    |     |                                     |
|----|-----|-------------------------------------|
| 1  |     |                                     |
| 2  |     |                                     |
| 3  |     |                                     |
| 4  | H83 | Otosclerosis                        |
| 5  | H86 | Deafness                            |
| 6  | K01 | Heart pain                          |
| 7  | K02 | Pressure/tightness of heart         |
| 8  | K04 | Palpitations/awareness of heart     |
| 9  | K05 | Irregular heartbeat other           |
| 10 | K07 | Swollen ankles/oedema               |
| 11 | K29 | Cardiovascular sympt./complt. other |
| 12 | K70 | Infection of circulatory system     |
| 13 | K71 | Rheumatic fever/heart disease       |
| 14 | K72 | Neoplasm cardiovascular             |
| 15 | K73 | Congenital anomaly cardiovascular   |
| 16 | K74 | Ischaemic heart disease w. angina   |
| 17 | K75 | Acute myocardial infarction         |
| 18 | K76 | Ischaemic heart disease w/o angina  |
| 19 | K77 | Heart failure                       |
| 20 | K78 | Atrial fibrillation/flutter         |
| 21 | K79 | Paroxysmal tachycardia              |
| 22 | K80 | Cardiac arrhythmia NOS              |
| 23 | K81 | Heart/arterial murmur NOS           |
| 24 | K82 | Pulmonary heart disease             |
| 25 | K83 | Heart valve disease NOS             |
| 26 | K84 | Heart disease other                 |
| 27 | K85 | Elevated blood pressure             |
| 28 | K86 | Hypertension uncomplicated          |
| 29 | K87 | Hypertension complicated            |
| 30 | K88 | Postural hypotension                |
| 31 | K89 | Transient cerebral ischaemia        |
| 32 | K90 | Stroke/cerebrovascular accident     |
| 33 | K91 | Cerebrovascular disease             |
| 34 | K92 | Atherosclerosis/PVD                 |
| 35 | K93 | Pulmonary embolism                  |
| 36 | K94 | Phlebitis/thrombophlebitis          |
| 37 | K95 | Varicose veins of leg               |
| 38 | K96 | Haemorrhoids                        |
| 39 | K99 | Cardiovascular disease other        |
| 40 | L01 | Neck symptom/complain               |
| 41 | L02 | Back symptom/complaint              |
| 42 | L03 | Low back symptom/complaint          |
| 43 | L04 | Chest symptom/complaint             |
| 44 | L05 | Flank symptom/complaint             |
| 45 | L06 | Axilla symptom/complaint            |
| 46 | L07 | Jaw symptom/complaint               |
| 47 |     |                                     |
| 48 |     |                                     |
| 49 |     |                                     |
| 50 |     |                                     |
| 51 |     |                                     |
| 52 |     |                                     |
| 53 |     |                                     |
| 54 |     |                                     |
| 55 |     |                                     |
| 56 |     |                                     |
| 57 |     |                                     |
| 58 |     |                                     |
| 59 |     |                                     |
| 60 |     |                                     |

|    |     |                                    |
|----|-----|------------------------------------|
| 1  |     |                                    |
| 2  |     |                                    |
| 3  |     |                                    |
| 4  | L08 | Shoulder symptom/complaint         |
| 5  | L09 | Arm symptom/complaint              |
| 6  | L10 | Elbow symptom/complaint            |
| 7  | L11 | Wrist symptom/complaint            |
| 8  | L12 | Hand/finger symptom/complaint      |
| 9  | L13 | Hip symptom/complaint              |
| 10 | L14 | Leg/thigh symptom/complaint        |
| 11 | L15 | Knee symptom/complaint             |
| 12 | L16 | Ankle symptom/complaint            |
| 13 | L17 | Foot/toe symptom/complaint         |
| 14 | L18 | Muscle pain                        |
| 15 | L19 | Muscle symptom/complaint NOS       |
| 16 | L20 | Joint symptom/complaint NOS        |
| 17 | L70 | Infections musculoskeletal system  |
| 18 | L71 | Malignant neoplasm musculoskeletal |
| 19 | L82 | Congenital anomaly musculoskeletal |
| 20 | L83 | Neck syndrome                      |
| 21 | L84 | Back syndrome w/o radiating pain   |
| 22 | L85 | Acquired deformity of spine        |
| 23 | L86 | Back syndrome with radiating pain  |
| 24 | L87 | Bursitis/tendinitis/synovitis NOS  |
| 25 | L88 | Rheumatoid/seropositive arthritis  |
| 26 | L92 | Shoulder syndrome                  |
| 27 | L93 | Tennis elbow                       |
| 28 | L94 | Osteochondrosis                    |
| 29 | L95 | Osteoporosis                       |
| 30 | L97 | Neoplasm benign/unspec musculo.    |
| 31 | L98 | Acquired deformity of limb         |
| 32 | L99 | Musculoskeletal disease, other     |
| 33 | N01 | Headache                           |
| 34 | N02 | Tension headache                   |
| 35 | N03 | Pain face                          |
| 36 | N04 | Restless legs                      |
| 37 | N05 | Tingling fingers/feet/toes         |
| 38 | N06 | Sensation disturbance other        |
| 39 | N07 | Convulsion/seizure                 |
| 40 | N16 | Disturbance of smell/taste         |
| 41 | N17 | Vertigo/dizziness                  |
| 42 | N18 | Paralysis/weakness                 |
| 43 | N19 | Speech disorder                    |
| 44 | N70 | Poliomyelitis                      |
| 45 | N71 | Meningitis/encephalitis            |
| 46 | N72 | Tetanus                            |
| 47 |     |                                    |
| 48 |     |                                    |
| 49 |     |                                    |
| 50 |     |                                    |
| 51 |     |                                    |
| 52 |     |                                    |
| 53 |     |                                    |
| 54 |     |                                    |
| 55 |     |                                    |
| 56 |     |                                    |
| 57 |     |                                    |
| 58 |     |                                    |
| 59 |     |                                    |
| 60 |     |                                    |

|    |     |                                   |
|----|-----|-----------------------------------|
| 1  |     |                                   |
| 2  |     |                                   |
| 3  |     |                                   |
| 4  | N73 | Neurological infection other      |
| 5  | N74 | Malignant neoplasm nervous system |
| 6  | N75 | Benign neoplasm nervous system    |
| 7  | N76 | Neoplasm nervous system unspec.   |
| 8  |     |                                   |
| 9  | N85 | Congenital anomaly neurological   |
| 10 | N86 | Multiple sclerosis                |
| 11 | N87 | Parkinsonism                      |
| 12 | N88 | Epilepsy                          |
| 13 |     |                                   |
| 14 | N89 | Migraine                          |
| 15 | N90 | Cluster headache                  |
| 16 | N91 | Facial paralysis/bell's palsy     |
| 17 | N92 | Trigeminal neuralgia              |
| 18 |     |                                   |
| 19 | N93 | Carpal tunnel syndrome            |
| 20 | N94 | Peripheral neuritis/neuropathy    |
| 21 |     |                                   |
| 22 | N99 | Neurological disease, other       |
| 23 | P01 | Feeling anxious/nervous/tense     |
| 24 | P02 | Acute stress reaction             |
| 25 | P03 | Feeling depressed                 |
| 26 |     |                                   |
| 27 | P04 | Feeling/behaving irritable/angry  |
| 28 | P06 | Sleep disturbance                 |
| 29 | P10 | Stammering/stuttering/tic         |
| 30 |     |                                   |
| 31 | P11 | Eating problem in child           |
| 32 | P12 | Bedwetting/enuresis               |
| 33 | P13 | Encopresis/bowel training problem |
| 34 | P20 | Memory disturbance                |
| 35 |     |                                   |
| 36 | P21 | ADHD                              |
| 37 | P22 | Child behaviour symptom/complaint |
| 38 | P23 | Adolescent behav. Symptom/compl.  |
| 39 | P24 | Specific learning problem         |
| 40 |     |                                   |
| 41 | P71 | Organic psychosis other           |
| 42 | P72 | Schizophrenia                     |
| 43 | P73 | Affective psychosis               |
| 44 |     |                                   |
| 45 | P74 | Anxiety disorder/anxiety state    |
| 46 | P75 | Somatization disorder             |
| 47 | P76 | Depressive disorder               |
| 48 |     |                                   |
| 49 | P78 | Neuraesthesia/surmenage           |
| 50 | P79 | Phobia/compulsive disorder        |
| 51 | P85 | Mental retardation                |
| 52 | P98 | Psychosis NOS/other               |
| 53 |     |                                   |
| 54 | P99 | Psychological disorders, other    |
| 55 | R01 | Pain respiratory system           |
| 56 | R02 | Shortness of breath/dyspnoea      |
| 57 |     |                                   |
| 58 | R03 | Wheezing                          |
| 59 |     |                                   |
| 60 |     |                                   |

|    |     |                                      |
|----|-----|--------------------------------------|
| 1  |     |                                      |
| 2  |     |                                      |
| 3  |     |                                      |
| 4  | R04 | Breathing problem, other             |
| 5  | R05 | Cough                                |
| 6  | R06 | Nose bleed/epistaxis                 |
| 7  | R07 | Sneezing/nasal congestion            |
| 8  | R08 | Nose symptom/complaint other         |
| 9  | R09 | Sinus symptom/complaint              |
| 10 | R21 | Throat symptom/complaint             |
| 11 | R22 | Tonsils symptom/complaint            |
| 12 | R23 | Voice symptom/complaint              |
| 13 | R24 | Haemoptysis                          |
| 14 | R25 | Sputum/phlegm abnormal               |
| 15 | R29 | Respiratory symptom/complaint oth.   |
| 16 | R70 | Tuberculosis airways                 |
| 17 | R71 | Whooping cough                       |
| 18 | R72 | Strep throat                         |
| 19 | R73 | Boil/abscess nose                    |
| 20 | R74 | Upper respiratory infection acute    |
| 21 | R75 | Sinusitis acute/chronic              |
| 22 | R76 | Tonsillitis acute                    |
| 23 | R77 | Laryngitis/tracheitis acute          |
| 24 | R78 | Acute bronchitis/bronchiolitis       |
| 25 | R80 | Influenza                            |
| 26 | R81 | Pneumonia                            |
| 27 | R82 | Pleurisy/pleural effusion            |
| 28 | R83 | Respiratory infection other          |
| 29 | R84 | Malignant neoplasm bronchus/lung     |
| 30 | R85 | Malinant neoplasm respiratory, other |
| 31 | R86 | Benign neoplasm respiratory          |
| 32 | R87 | Foreign body nose/larynx/bronch      |
| 33 | R89 | Congenital anomaly respiratory       |
| 34 | R90 | Hypertrophy tonsils/adenoids         |
| 35 | R91 | Chronic bronchitis                   |
| 36 | R93 | Pleural effusion                     |
| 37 | R95 | Chronic obstructive pulmonary dis    |
| 38 | R96 | Asthma                               |
| 39 | R97 | Allergic rhinitis                    |
| 40 | R98 | Hyperventilation syndrome            |
| 41 | R99 | Respiratory disease other            |
| 42 | S01 | Pain/tenderness of skin              |
| 43 | S02 | Pruritus                             |
| 44 | S03 | Warts                                |
| 45 | S04 | Lump/swelling localized              |
| 46 | S05 | Lumps/swellings generalized          |
| 47 |     |                                      |
| 48 |     |                                      |
| 49 |     |                                      |
| 50 |     |                                      |
| 51 |     |                                      |
| 52 |     |                                      |
| 53 |     |                                      |
| 54 |     |                                      |
| 55 |     |                                      |
| 56 |     |                                      |
| 57 |     |                                      |
| 58 |     |                                      |
| 59 |     |                                      |
| 60 |     |                                      |

|    |     |                                    |
|----|-----|------------------------------------|
| 1  |     |                                    |
| 2  |     |                                    |
| 3  |     |                                    |
| 4  | S06 | Rash localized                     |
| 5  | S07 | Rash generalized                   |
| 6  | S08 | Skin colour change                 |
| 7  | S09 | Infected finger/toe                |
| 8  | S10 | Boil/carbuncle                     |
| 9  |     |                                    |
| 10 | S11 | Skin infection post-traumatic      |
| 11 | S12 | Insect bite/sting                  |
| 12 | S13 | Animal/human bite                  |
| 13 |     |                                    |
| 14 | S14 | Burn/scald                         |
| 15 | S15 | Foreign body in skin               |
| 16 | S20 | Corn/callosity                     |
| 17 |     |                                    |
| 18 | S21 | Skin texture symptom/complaint     |
| 19 | S22 | Nail symptom/complaint             |
| 20 | S23 | Hair loss/baldness                 |
| 21 | S24 | Hair/scalp symptom/complaint       |
| 22 |     |                                    |
| 23 | S70 | Herpes zoster                      |
| 24 | S71 | Herpes simplex                     |
| 25 | S72 | Scabies/other acariasis            |
| 26 | S73 | Pediculosis/skin infestation other |
| 27 |     |                                    |
| 28 | S74 | Dermatophytosis                    |
| 29 | S75 | Moniliasis/candidiasis skin        |
| 30 | S76 | Skin infection other               |
| 31 | S77 | Malignant neoplasm of skin         |
| 32 | S78 | Lipoma                             |
| 33 |     |                                    |
| 34 | S79 | Neoplasm skin benign/unspecified   |
| 35 | S80 | Solar keratosis/sunburn            |
| 36 | S81 | Haemangioma/lymphangioma           |
| 37 | S82 | Naevus/mole                        |
| 38 | S83 | Congenital skin anomaly other      |
| 39 | S84 | Impetigo                           |
| 40 | S85 | Pilonidal cyst/fistula             |
| 41 | S86 | Dermatitis seborrhoeic             |
| 42 | S87 | Dermatitis/atopic eczema           |
| 43 | S89 | Diaper rash                        |
| 44 | S90 | Pityriasis rosea                   |
| 45 | S91 | Psoriasis                          |
| 46 | S92 | Sweat gland disease                |
| 47 | S93 | Sebaceous cyst                     |
| 48 | S94 | Ingrowing nail                     |
| 49 | S95 | Molluscum contagiosum              |
| 50 | S96 | Acne                               |
| 51 | S97 | Chronic ulcer skin                 |
| 52 | S98 | Urticaria                          |
| 53 |     |                                    |
| 54 |     |                                    |
| 55 |     |                                    |
| 56 |     |                                    |
| 57 |     |                                    |
| 58 |     |                                    |
| 59 |     |                                    |
| 60 |     |                                    |

|    |     |                                    |
|----|-----|------------------------------------|
| 1  |     |                                    |
| 2  |     |                                    |
| 3  | S99 | Skin disease, other                |
| 4  | T01 | Excessive thirst                   |
| 5  | T02 | Excessive appetite                 |
| 6  | T03 | Loss of appetite                   |
| 7  | T04 | Feeding problem of infant/child    |
| 8  | T05 | Feeding problem of adult           |
| 9  | T06 | Anorexia nervosa                   |
| 10 | T07 | Weight gain                        |
| 11 | T08 | Weight loss                        |
| 12 | T10 | Growth delay                       |
| 13 | T11 | Dehydration                        |
| 14 | T15 | Tumor thyroid                      |
| 15 | T70 | Endocrine infection                |
| 16 | T71 | Malignant neoplasm thyroid         |
| 17 | T72 | Benign neoplasm thyroid            |
| 18 | T73 | Neoplasm endocrine oth/unspecified |
| 19 | T78 | Thyroglossal duct/cys              |
| 20 | T80 | Congenital anom endocrine/metab    |
| 21 | T81 | Goitre                             |
| 22 | T82 | Obesity                            |
| 23 | T83 | Overweight                         |
| 24 | T85 | Hyperthyroidism/thyrotoxicosis     |
| 25 | T86 | Hypothyroidism/myxoedema           |
| 26 | T87 | Hypoglycaemia                      |
| 27 | T88 | Renal glycosuria                   |
| 28 | T89 | Diabetes insulin dependent         |
| 29 | T90 | Diabetes non-insulin dependent     |
| 30 | T91 | Vitamin/nutritional deficiency     |
| 31 | T92 | Gout                               |
| 32 | T93 | Lipid disorder                     |
| 33 | T99 | Endocrine/metab/nutrit. dis. other |
| 34 | U01 | Dysuria/painful urination          |
| 35 | U02 | Urinary frequency/urgency          |
| 36 | U04 | Incontinence urine                 |
| 37 | U05 | Urination problems other           |
| 38 | U06 | Haematuria                         |
| 39 | U07 | Urine symptom/complaint other      |
| 40 | U13 | Bladder symptom/complaint other    |
| 41 | U14 | Kidney symptom/complaint           |
| 42 | U70 | Pyelonephritis/pyelitis            |
| 43 | U71 | Cystitis/urinary infection other   |
| 44 | U72 | Urethritis                         |
| 45 | U75 | Malignant neoplasm of kidney       |
| 46 |     |                                    |
| 47 |     |                                    |
| 48 |     |                                    |
| 49 |     |                                    |
| 50 |     |                                    |
| 51 |     |                                    |
| 52 |     |                                    |
| 53 |     |                                    |
| 54 |     |                                    |
| 55 |     |                                    |
| 56 |     |                                    |
| 57 |     |                                    |
| 58 |     |                                    |
| 59 |     |                                    |
| 60 |     |                                    |

|    |     |                                   |
|----|-----|-----------------------------------|
| 1  |     |                                   |
| 2  |     |                                   |
| 3  | U76 | Malignant neoplasm of bladder     |
| 4  | U77 | Malignant neoplasm urinary other  |
| 5  | U78 | Benign neoplasm urinary tract     |
| 6  | U79 | Neoplasm urinary tract NOS        |
| 7  | U85 | Congenital anomaly urinary tract  |
| 8  | U88 | Glomerulonephritis/nephrosis      |
| 9  | U90 | Orthostatic albumin/proteinuria   |
| 10 | U95 | Urinary calculus                  |
| 11 | U98 | Abnormal urine test NOS           |
| 12 | U99 | Urinary disease, other            |
| 13 | X83 | Congenital anomaly genital female |
| 14 | X84 | Vaginitis/vulvitis NOS            |
| 15 | X85 | Cervical disease NOS              |
| 16 | X99 | Genital disease female, other     |
| 17 | Y74 | Orchitis/epididymitis             |
| 18 | Y75 | Balanitis                         |
| 19 | Y81 | Phimosis/redundant prepuce        |
| 20 | Y82 | Hypospadias                       |
| 21 | Y83 | Undescended testicle              |
| 22 | Y84 | Congenital genl anomaly (m) other |
| 23 | Y99 | Genital disease male, other       |
| 24 |     |                                   |
| 25 |     |                                   |
| 26 |     |                                   |
| 27 |     |                                   |
| 28 |     |                                   |
| 29 |     |                                   |
| 30 |     |                                   |
| 31 |     |                                   |
| 32 |     |                                   |
| 33 |     |                                   |
| 34 |     |                                   |
| 35 |     |                                   |
| 36 |     |                                   |
| 37 |     |                                   |
| 38 |     |                                   |
| 39 |     |                                   |
| 40 |     |                                   |
| 41 |     |                                   |
| 42 |     |                                   |
| 43 |     |                                   |
| 44 |     |                                   |
| 45 |     |                                   |
| 46 |     |                                   |
| 47 |     |                                   |
| 48 |     |                                   |
| 49 |     |                                   |
| 50 |     |                                   |
| 51 |     |                                   |
| 52 |     |                                   |
| 53 |     |                                   |
| 54 |     |                                   |
| 55 |     |                                   |
| 56 |     |                                   |
| 57 |     |                                   |
| 58 |     |                                   |
| 59 |     |                                   |
| 60 |     |                                   |

# BMJ Open

## Risks for comorbidity in atopic children: an observational study in Dutch general practices

|                                 |                                                                                                                                                                                                                                                                                                         |
|---------------------------------|---------------------------------------------------------------------------------------------------------------------------------------------------------------------------------------------------------------------------------------------------------------------------------------------------------|
| Journal:                        | <i>BMJ Open</i>                                                                                                                                                                                                                                                                                         |
| Manuscript ID                   | bmjopen-2017-018091.R1                                                                                                                                                                                                                                                                                  |
| Article Type:                   | Research                                                                                                                                                                                                                                                                                                |
| Date Submitted by the Author:   | 18-Sep-2017                                                                                                                                                                                                                                                                                             |
| Complete List of Authors:       | Pols, David; Erasmus MC, Family Medicine<br>Bohnen, Arthur; Erasmus MC, General Practice<br>Nielen, Markus MJ; NIVEL, Netherlands Institute for Health Services Research,<br>Korevaar, J; Netherlands Institute for Health Services Research (NIVEL),<br>Bindels, Patrick; Erasmus MC, General Practice |
| <b>Primary Subject Heading</b>: | General practice / Family practice                                                                                                                                                                                                                                                                      |
| Secondary Subject Heading:      | Ear, nose and throat/otolaryngology, Epidemiology, Immunology (including allergy), Paediatrics, Respiratory medicine                                                                                                                                                                                    |
| Keywords:                       | PRIMARY CARE, EPIDEMIOLOGY, PAEDIATRICS                                                                                                                                                                                                                                                                 |
|                                 |                                                                                                                                                                                                                                                                                                         |

SCHOLARONE™  
Manuscripts



# Risks for comorbidity in atopic children: an observational study in Dutch general practices

David H.J. Pols<sup>1</sup>, Arthur M. Bohnen<sup>1</sup>, Mark M.J. Nielen<sup>2</sup>, Joke C. Korevaar<sup>2</sup>, Patrick J.E. Bindels<sup>1</sup>

1. Department of General Practice, Erasmus MC, University Medical Center Rotterdam

2. NIVEL, Netherlands Institute for Health Services Research, Utrecht

## Corresponding author:

David HJ Pols

Dept. of General Practice

Erasmus University Medical Center Rotterdam

PO Box 2040, 3000 CA Rotterdam

The Netherlands

Telephone: +31 (0)10-7044824

Email: [d.pols@erasmusmc.nl](mailto:d.pols@erasmusmc.nl)

Website: <http://www.erasmusmc.nl/huisartsgeneeskunde>

## Abstract

**Objective:** This study aimed to investigate both atopic and non-atopic comorbid symptoms and diseases in children with physician-diagnosed atopic disorders (atopic eczema, asthma and allergic rhinitis).

**Methods:** All children aged 0-18 years listed in a nationwide primary care database (NIVEL-PCD) with routinely collected health care data in 2014 were selected. Atopic children were matched on age and gender with non-atopic controls within the same general practice. A total of 404 ICPC codes were examined. Logistic regression analyses were performed to examine the associations between the presence of atopic disorders and (non-) atopic symptoms and diseases by calculating odds ratios (OR).

**Results:** Having one of the atopic disorder significantly increased the risk of having other atopic-related symptoms, even if the child was not registered as having the related atopic disorder. Regarding non-atopic comorbidity, children with atopic eczema (n: 15,530) were at significantly increased risk for (infectious) skin diseases (OR: 1.2-3.4). Airway symptoms or (infectious) diseases (OR: 2.1-10.3) were observed significantly more frequently in children with asthma (n: 7,887). Children with allergic rhinitis (n: 6,835) had a significantly distinctive risk of ear-nose-throat related symptoms and diseases (OR: 1.5-3.9). Neither age nor gender explained these increased risks.

**Conclusion:** General practitioners are not always fully aware of relevant atopic and non-atopic comorbidity. In children known to have at least one atopic disorder, specific attention is required to avoid possible insufficient treatment and unnecessary loss of quality of life.

**Keywords:** Atopic dermatitis, Asthma, Allergic rhinitis, General practice, Comorbidity, Epidemiology

## Strengths and limitations of this study

- The present study used an extensive and representative general practice database.
- The large number of children gives the study substantial power and generalizability.
- A total of 404 ICPC codes were examined.
- A limitation regarding this type of explorative study is the unavoidable multiple testing.

For peer review only

## 41 Introduction

42 Atopic disorders represent an important health problem in general practice. Acute upper airway infections,  
43 middle ear infections, warts, asthma, and atopic eczema represent the five most prevalent pediatric diseases  
44 diagnosed in general practice (1); allergic rhinitis is on the 12<sup>th</sup> place in this list. However, limited data are  
45 available on the co-morbidities of atopic children in primary care (2). In the present study we refer to atopy as  
46 a (genetic) predisposition toward developing certain allergic hypersensitivity. Therefore the clinical  
47 manifestation of atopy is allergy. However, not all allergies are based on atopy. In this study the word 'atopic'  
48 refers to this genetically mediated predisposition, which did result in the clinical diagnosis by a GP of atopic  
49 eczema, asthma and allergic rhinitis.

50 Associations have been shown between atopic disorders and other diseases in children, but in different clinical  
51 settings (e.g. birth cohorts, hospitals, or pediatric clinics). Demonstrated interrelations exist with (among  
52 others) diabetes (3-5), ADHD (6-8), autism (9-11), and obesity (12-14). According to other studies, the presence  
53 of some comorbidities may even influence the course of atopic disorders. For example, acute upper airway  
54 infections, especially in early childhood, are related to atopic disorders later in life (15, 16). Acute viral 'non-  
55 respiratory syncytial virus' bronchiolitis in infants aged <6 months is linked with an increased risk of developing  
56 asthma (17). The developing immune system of a child might be affected by frequent or severe infections of  
57 the middle ear, resulting in increased risk for asthma and atopic eczema (18). On the other hand, otitis media  
58 with effusion is associated with allergic rhinitis (19-21). The quality of life of an atopic child can be significantly  
59 improved by providing sufficient treatment.

60 To our knowledge no study has investigated the complete range of potential comorbidities in atopic children in  
61 a general practice setting. A relevant question could be: Are atopic children at increased risk for non-atopic  
62 symptoms or diseases? Awareness by GPs of these risks may reduce the probability that relevant comorbidity is

1  
2  
3  
4  
5  
6  
7  
8  
9  
10  
11  
12  
13  
14  
15  
16  
17  
18  
19  
20  
21  
22  
23  
24  
25  
26  
27  
28  
29  
30  
31  
32  
33  
34  
35  
36  
37  
38  
39  
40  
41  
42  
43  
44  
45  
46  
47  
48  
49  
50  
51  
52  
53  
54  
55  
56  
57  
58  
59  
60

63 not diagnosed. To study possible associations between atopic disorders and 404 different symptoms and  
64 diseases, an extensive and representative nationwide general practice database is explored using a cross-  
65 sectional design. The design of this study allows new hypotheses to be generated, providing valuable input for  
66 future research.

67

For peer review only

## 68 **Methods**

### 69 **Study population**

70 All non-institutionalized residents in the Netherlands are registered in a general practice, even if they do not  
71 visit the GP on a regular basis. The Netherlands Institute for Health Services Research-Primary Care Database  
72 (NIVEL-PCD) is based on routinely recorded data in electronic health records (EHRs) of all listed patients in the  
73 participating practices. In 2014, about 500 general practices participated, including data of about 1,700,000  
74 patients ([www.nivel.nl/en/dossier/nivel-primary-care-database](http://www.nivel.nl/en/dossier/nivel-primary-care-database)), which is over 10% of the total Dutch  
75 population. EHR data include a variety of information regarding type of consultation, morbidity, and  
76 prescriptions. Data available for 2014 are representative for the Dutch population (22).

### 77 **ICPC and episodes of care**

78 Primary care physicians (gatekeepers for the Dutch healthcare system) recorded morbidity using the  
79 International Classification of Primary Care (ICPC), a classification method for primary care that is accepted by  
80 the WHO (23). It has been translated in 22 languages and is now widely used for the routine collection of data  
81 on episodes of care, but also in encounter studies (24). Routinely collected general practice computer data,  
82 aggregated into large databases, is used for epidemiological research(25). Hippisley-Cox et al. illustrates how  
83 routine clinical data, in selected high recording practices (this selection criteria was also applied in the present  
84 study), are now reaching reasonable levels of accuracy and completeness for a range of key variables (26).  
85 According to Britt et al., morbidity data actively collected by GPs provide a reliable overview of morbidity  
86 managed in general practice (27).

87 Dutch GPs cluster relevant consultations, prescriptions and referrals, in ICPC classified "episodes of care". An  
88 episode of care is a health problem or disease from its first presentation to the GP to the last presentation for

1  
2  
3  
4  
5  
6  
7  
8  
9  
10  
11  
12  
13  
14  
15  
16  
17  
18  
19  
20  
21  
22  
23  
24  
25  
26  
27  
28  
29  
30  
31  
32  
33  
34  
35  
36  
37  
38  
39  
40  
41  
42  
43  
44  
45  
46  
47  
48  
49  
50  
51  
52  
53  
54  
55  
56  
57  
58  
59  
60

89 the same problem. Atopic disorders are labeled with ICPC codes: S87 (atopic eczema), R96 (asthma) and R97  
90 (allergic rhinitis). ICPC-codes specific for food-allergies are not available.

91 For the present study, only morbidity data from EHRs of general practices with sufficient data quality were  
92 used that fulfilled the following criteria: i) at least 500 listed patients (standard practice: 2,350 patients), ii)  
93 complete morbidity registration (defined as  $\geq 46$  weeks/year), and iii) sufficient ICPC coding of diagnostic  
94 information (defined as  $\geq 70\%$  of the recorded disease episodes labeled with an ICPC code; average ICPC coding  
95 in a Dutch general practice is  $>95\%$ ). The following descriptive data were routinely collected: period in which  
96 the individual child was registered in the general practice, the unique code of the GP practice, the child's  
97 gender, and year and quarter of birth.

### 98 **Atopic children**

99 For each child (0-18 years), a minimum follow-up of 3 years was required (e.g. data had to be available for  
100 2012-2014) for the present study to reduce the risk of registration bias. For this reason, only data for children  
101 aged  $\geq 2$  years are presented here. In the Netherlands, GPs see about 72% of their patient population at least  
102 once a year (28). We considered a 3-year follow-up period to be sufficient time for a GP to diagnose a child  
103 with (atopic) disorders. Furthermore, in order not to miss any relevant atopic diagnosis, when available, the  
104 EHRs from 2002-2014 were examined. Since GPs inevitably work with probability diagnoses, there is a risk of  
105 misclassification. To select cases with a higher probability of a clinically relevant disorder, ICPC codes and their  
106 related episodes of care can be corrected. In practice, an atopic episode of care was maintained if (between  
107 2002-2014) the child had at least contacted the GP twice in that episode of care and had received at least two  
108 relevant prescriptions. If the child did not meet these criteria, the child was considered not to have that atopic  
109 disorder (29) and was excluded from the study (this child could not be used as a control patient, to make sure  
110 that controls did not have any atopic disorder). If a child was diagnosed with an atopic disorder for the first

1  
2  
3 111 time during 2014, the child was considered to have the atopic disorder that whole year. In the present study,  
4  
5  
6 112 the atopic diagnosis was based on the physician's assessment and was considered to be a chronic problem.  
7

### 8 9 113 *Atopic triad*

10  
11  
12 114 A recent meta-analysis supported the hypothesis that there might be a fourth distinct group of children with all  
13  
14 115 three atopic disorders, in contrast to the traditional classification of children with asthma *or* allergic rhinitis *or*  
15  
16 116 atopic eczema (30). To learn more about this potentially unique group of children, 'atopic triad' episodes were  
17  
18  
19 117 developed for research purposes. These episodes were only created when a child was diagnosed with all three  
20  
21 118 atopic disorders, based on available data from EHRs in the period 2002-2014.  
22  
23

### 24 119 **Symptoms and diseases studied**

25  
26  
27 120 After establishing which child had an atopic disorder (see above), a child was considered prevalent for a specific  
28  
29  
30 121 symptom or disease if the child had at least one active episode of care for that symptom or disorder between  
31  
32 122 January and December of 2014. All ICPC codes that describe a symptom or a disease were examined, with the  
33  
34 123 exception of trauma-related ICPC codes, ICPC codes not relevant for children (e.g. presbycusis), pregnancy,  
35  
36 124 childbearing, family planning, sexual transmitted diseases and social problems, leaving 404 different ICPC  
37  
38  
39 125 codes. Furthermore, since different classifications are used for eczema, there is a risk of misclassification. The  
40  
41 126 ICPC system distinguishes the codes S86 (seborrheic dermatitis), S87 (atopic eczema), S88 (contact dermatitis /  
42  
43 127 eczema another) and S89 (diaper rash). Since clinical differentiation can be very difficult, especially between  
44  
45  
46 128 S87 and S88, S88 was excluded from our analyses, to get more reliable results for 'true' atopic eczema (S87).  
47  
48

### 49 129 **Design**

50  
51  
52 130 An observational study design was used in which cases with one atopic disorder were matched with controls  
53  
54  
55 131 without any atopic disorder. For each atopic child, one matched control patient was selected (not diagnosed  
56  
57 132 with an atopic disorder) within the same general practice, based on age and gender in 2014. Controls were only  
58  
59  
60



1  
2  
3  
4  
5  
6  
7  
8  
9  
10  
11  
12  
13  
14  
15  
16  
17  
18  
19  
20  
21  
22  
23  
24  
25  
26  
27  
28  
29  
30  
31  
32  
33  
34  
35  
36  
37  
38  
39  
40  
41  
42  
43  
44  
45  
46  
47  
48  
49  
50  
51  
52  
53  
54  
55  
56  
57  
58  
59  
60

133 matched if a 100%- match on age, gender and general practice with an atopic child was determined. Odds  
134 ratios (ORs) were calculated for children that solely had atopic eczema, asthma, or allergic rhinitis and  
135 therefore no other atopic comorbidity. Appendix 1 presents a list of all the ICPC codes that were examined. A  
136 1:1 ratio was chosen to be able to include as many pairs of cases and controls as possible, allowing the results  
137 to carry more weight and making the conclusions more generalizable to future populations. In the present  
138 study, a 1:2 ratio would have resulted in dropping over 40% of the cases.

### 139 **Statistical analyses**

140 Logistic regression analysis was performed to study associations between the presence of atopic disorders and  
141 (non-) atopic comorbid symptoms and diseases in children. Similarly, associations between atopic triad and the  
142 above-mentioned comorbid symptoms and diseases were examined. Due to multiple testing, only associations  
143 with  $p \leq 0.001$  were considered statistically significant. All associations were tested for the modifying effects of  
144 age and gender. In case of a significant effect ( $p \leq 0.01$ ), associations were also presented for subgroups for age  
145 (2-6 vs. 7-12 vs. 13-18 years) and gender (boy vs. girl). Finally, due to the hierarchical structure of the data  
146 (patients registered in general practices), a multi-level logistic regression analysis was performed to test  
147 whether clustering effects influenced our findings. All analyses were conducted in Stata 13 and Excel 2010.  
148 Prevalence rates are presented in percentages.

### 149 **Ethical approval**

150 Dutch law allows the use of EHRs for research purposes under certain conditions. According to this legislation,  
151 it is not necessary to obtain informed consent from patients or approval from a medical ethics committee for  
152 this type of observational study that contains no directly identifiable data (Dutch Civil Law, Article 7: 458).  
153 Therefore, no waiver of ethical approval was obtained from an Institutional Review Board (IRB) or ethics  
154 committee. The authors had no access to any identifying information at any moment during the analysis of the  
155 data.

## Results

### General characteristics (Table 1)

409,312 children were identified in the NIVEL-PCD in 2014, initially including 70,494 atopic children with at least one atopic disorder. However, for an atopic child to be included in this study, one matched control patient had to be available (i.e. a child without an atopic disorder). There were 21,285 children with atopic eczema identified, of which 15,530 children had atopic eczema without another atopic disorder. For asthmatic children, 13,196 children were identified, of which 7,887 had asthma only and no other atopic disorders. In children with AR, 11,483 were identified of which 6,835 had AR without another atopic disorder. Finally, 559 children had all three atopic disorders. All the children in these groups were selected from 316 different general practices participating in NIVEL-PCD. Clustering effects did not influence our findings.

### Atopic eczema (Table 2)

A substantial part of the significantly related comorbidity for children with atopic eczema concerns skin diseases such as (among others): warts (OR 1.2), localized rash (OR 1.5), pruritus (OR 1.7), impetigo (OR 1.7), dermatophytosis (OR 1.8), urticaria (OR 1.8), molluscum contagiosum (OR 1.9) and psoriasis (OR 3.4). Otitis externa (OR 1.6) and blepharitis (OR 1.5) were also significantly associated with atopic eczema. The symptom diagnosis of wheezing (OR 2.0), that could be attributed to asthma, is noteworthy since these children were not diagnosed or coded in the EHRs with asthma. The same applies to symptoms associated with allergic rhinoconjunctivitis, such as sneezing/nasal congestion (OR 2.0) and allergic conjunctivitis (OR 2.0). Older children with atopic eczema were at increased risk to develop a localized rash (OR 1.3 - > 2.3) and impetigo (OR 1.5 - > 2.7). Compared to boys, girls had an increased risk, to develop a localized rash (OR 2.0 vs. 1.1), breathing problems (OR 3.6 vs. 0.9) and stomach function disorder (OR 3.3 vs. 0.7).

### Asthma (Table 3)

1  
2  
3 178 Noteworthy are asthma-related symptoms that were diagnosed separately, such as shortness of  
4  
5  
6 179 breath/dyspnea (OR 7.7) and wheezing (OR 10.3). Furthermore, asthmatic children consulted their GP more  
7  
8 180 frequently for airway-related infections such as: acute laryngitis/tracheitis (OR 2.3), acute upper respiratory  
9  
10 181 infection (OR 2.4), pneumonia (OR 4.0) and acute bronchitis (OR 4.8). In children with asthma, there seems to  
11  
12 182 be a higher risk for the development of gastrointestinal symptoms, e.g.: general abdominal pain/cramps (OR  
13  
14  
15 183 1.4), localized abdominal pain (OR 1.4), constipation (OR 1.4) and vomiting (OR 2.0). Acute bronchitis (OR 3.7 -  
16  
17 184 >8.1) was diagnosed more often in older children. Inguinal hernias were seen more frequently in girls than in  
18  
19 185 boys (OR 4.5 vs. 0.3).

#### 22 186 **Allergic rhinitis (Table 4)**

23  
24  
25  
26 187 Children with allergic rhinitis visit their GPs more frequently for ear-nose-throat related symptoms and  
27  
28 188 diseases. Among others, the following were diagnosed more often: throat symptom/complaint (OR 1.5), ear  
29  
30 189 pain/earache (OR 1.9), hypertrophy tonsils/adenoids (OR 1.9), acute/chronic sinusitis (OR 2.0), nose symptom  
31  
32 190 (OR 2.6) and sneezing/nasal congestion (OR 3.9). Furthermore, symptoms associated with atopic eczema  
33  
34  
35 191 (pruritus; OR 2.2) and asthma [shortness of breath/dyspnea (OR 2.7) and wheezing (OR 4.3)] were seen more  
36  
37 192 frequently. Also, when a child was diagnosed with allergic rhinitis, there was a substantial risk for the  
38  
39 193 development of gastrointestinal symptoms [constipation (OR 1.5) and localized abdominal pain (OR 1.8)].  
40  
41  
42 194 Hypertrophy of the tonsils was diagnosed less frequently when children got older (OR 3.2 - >1.0). On the other  
43  
44 195 hand, children were more frequently diagnosed with a viral exanthema when they became older (OR 0.3 -  
45  
46 196 >4.5). A presumed gastro-intestinal infection (OR 3.4 vs. 1.3), speech disorder (OR 2.4 vs. 0.9) and  
47  
48  
49 197 blepharitis/style/chalazion (OR 3.3 vs. 1.2) were diagnosed more frequently in girls with allergic rhinitis.

#### 52 198 **Atopic triad (Table 5)**

53  
54  
55 199 Having all three atopic disorders is relatively rare, with only a few symptoms and diseases being significantly  
56  
57 200 related. The risk for developing an 'allergy', that the GP considers relevant to register in the EHR can be

1  
2  
3 201 considered high (OR 17.8). Allergic conjunctivitis (OR 6.8) is also frequently seen in children with all three atopic  
4  
5  
6 202 disorders.  
7  
8  
9  
10  
11  
12  
13  
14  
15  
16  
17  
18  
19  
20  
21  
22  
23  
24  
25  
26  
27  
28  
29  
30  
31  
32  
33  
34  
35  
36  
37  
38  
39  
40  
41  
42  
43  
44  
45  
46  
47  
48  
49  
50  
51  
52  
53  
54  
55  
56  
57  
58  
59  
60

## Discussion

### Main findings

The present study used an extensive and representative general practice database (22). The large number of children gives the study substantial power and generalizability. This could also allow evaluation of possible links between atopic disorders and rare childhood diseases. This study showed that atopic children have an increased risk for the development of both atopic and non-atopic diseases and symptoms. Children diagnosed with one atopic disorder were frequently diagnosed by their GP with symptoms associated with one of the (other) atopic disorder(s). This suggests that GPs are not always fully aware of relevant atopic comorbidity, or at least do not label it correctly. Two examples support this hypothesis. First of all, a child diagnosed with atopic eczema is also diagnosed with pruritus, suggesting possible misclassification. Secondly, a child with atopic eczema that presents with 'wheeze' or 'dyspnea' is at a higher risk for the development of asthma compared to a child without atopic eczema. A GP should be aware of this increased risk, since it could result in insufficient treatment of a child. However, a GP could also use symptom-related ICPC-codes deliberately when the purpose is to record a provisional diagnosis (e.g. wheeze as the provisional diagnosis of asthma). Regarding non-atopic co-morbidity, strong associations were found between the atopic disorder and diseases and symptoms related to the same organ system. For example, children with atopic eczema are at increased risk for the development of other skin diseases, asthmatic children are at risk of other airway diseases, and children with allergic rhinitis are at risk of ear-nose-throat-related symptoms and diseases. Gastro-intestinal and musculoskeletal diseases and symptoms were also seen more frequently in atopic children. When exploring possible interactions of age and gender in children with one atopic disorders, no clear patterns arose.

### Interpretation of findings in relation to previously published work

1  
2  
3  
4  
5  
6  
7  
8  
9  
10  
11  
12  
13  
14  
15  
16  
17  
18  
19  
20  
21  
22  
23  
24  
25  
26  
27  
28  
29  
30  
31  
32  
33  
34  
35  
36  
37  
38  
39  
40  
41  
42  
43  
44  
45  
46  
47  
48  
49  
50  
51  
52  
53  
54  
55  
56  
57  
58  
59  
60

224 Children with atopic eczema had an increased risk of developing infectious skin diseases such as warts,  
225 impetigo, dermatophytosis and molluscum contagiosum. The common etiology could be the barrier  
226 dysfunction of the skin in children with atopic eczema. This barrier dysfunction is also seen in psoriasis, a  
227 disease that, according to the present study, is associated with atopic eczema (OR 3.4). They share some  
228 common pathological backgrounds such as barrier dysfunction and enhanced IL-22 expression (31). Although  
229 the clinical pictures of these two diseases can be very different, the observed association could also suggest  
230 misclassification among these two chronic skin diseases that are often confused for one another. Otitis externa  
231 and blepharitis both had significant ORs. These disorders could in fact be an expression of atopic eczema.

232 Children with asthma seem to have consulted their GP more frequently for airway-related infections such as  
233 acute laryngitis/tracheitis, acute upper respiratory infection, pneumonia and bronchitis. This is in agreement  
234 with another primary healthcare study (2). An explanation for this could be that airway infections increase  
235 asthma symptoms or vice versa, that asthma resulted in increased susceptibility for infection, which increased  
236 their motivation to visit the GP. Furthermore, the awareness of parents is likely to be increased when a child  
237 suffers from asthma, since such an infection could predispose for an asthma exacerbation.

238 Children with allergic rhinitis consulted their GPs more frequently for ear-nose-throat-related symptoms and  
239 diseases. However, even more striking are the asthma-related symptoms. Both shortness of breath (OR 2.7)  
240 and wheeze (OR 4.3) were frequently seen in children with allergic rhinitis. There is strong evidence that  
241 allergic rhinitis has an adverse impact on asthma severity (32). Because allergic rhinitis can provoke asthma  
242 symptoms, allergic rhinitis symptoms should be taken more seriously by GPs to reduce insufficient treatment.

243 Gastrointestinal-related symptoms are also frequently diagnosed by GPs in atopic children. This is in  
244 accordance with a study in adults in a primary care setting (33). These symptoms could be related to IgE-  
245 mediated food allergies or in rare cases even to eosinophilic esophagitis that are associated with atopic  
246 disorders (34); however, in children, abdominal pains can also be a general expression of not feeling well.

1  
2  
3  
4  
5  
6  
7  
8  
9  
10  
11  
12  
13  
14  
15  
16  
17  
18  
19  
20  
21  
22  
23  
24  
25  
26  
27  
28  
29  
30  
31  
32  
33  
34  
35  
36  
37  
38  
39  
40  
41  
42  
43  
44  
45  
46  
47  
48  
49  
50  
51  
52  
53  
54  
55  
56  
57  
58  
59  
60

247 Unfortunately, the ICPC classification system does not cover the above-mentioned gastrointestinal diseases  
248 with unique code and, therefore, gastrointestinal-related symptoms might have been used by the GP to label  
249 these diseases.

250 Some associations described in the literature were not confirmed in the present study, e.g. serous otitis media  
251 in patients with allergic rhinitis (19, 21), and inflammatory bowel disease (35, 36), leukemia (37, 38) and  
252 diabetes (39, 40) in atopic patients. The prevalences of some of these disorders are low and a cross-sectional  
253 design (as used in the present study), might not have enough power to prove these relationships.

### 254 **Strengths and limitations of this study**

255 Using general practice databases (by means of a cross-sectional design) also has its limitations. First of all, a  
256 limitation for the present study is the GP's choice for ICPC coding of an episode of care. For example, a child  
257 with a wheeze could either be labeled as 'asthma' (R96) or labeled as 'wheeze' (R03). This could result in both  
258 overestimation or underestimation of asthma. To decrease this risk of overestimation regarding atopic  
259 disorders, some episodes were corrected in order to increase the clinical relevance of the atopic disorder of  
260 interest. However, the risk of underestimation was not tackled, since too many assumptions need to be made.  
261 The second limitation regarding this type of explorative study is the unavoidable multiple testing. Although  
262 conservative p-values were used, type 1 errors cannot be avoided. In this study, some suggested associations  
263 might in fact reflect these type 1 errors. Thirdly, because data on socioeconomic status, tobacco smoke  
264 exposure and other lifestyle-related risk factors are not recorded in NIVEL-PCD, we cannot rule out the effect of  
265 these risk factors on the observed relations. However, since the children with atopic disorders were matched  
266 with controls within the same general practice, all children are most likely living in the same neighborhoods  
267 and therefore the effect of most of the earlier mentioned risk factors is expected to be small. Fourthly, atopic  
268 children might visit the GP more frequently than non-atopic children. And although this may be more  
269 representative of parental fears, rather than an indication of morbidity, it can result in more detected

1  
2  
3 270 morbidity in atopic children and could partly explain some of the associations found. In future research, the  
4  
5  
6 271 number of consultations might need to be taken into account in the analyses. Fifth of all, in the present study  
7  
8 272 the diagnosis are based on a physician's assessment and not on confirmed sensitization pattern for allergens.  
9  
10 273 According to the Dutch medical guideline for eczema (41), GPs are not advised to determine these sensitization  
11  
12 274 patterns, since this doesn't have any clinical consequences. Although atopy is clearly associated with atopic  
13  
14  
15 275 eczema, the role of IgE sensitization in atopic eczema still needs further study (42). Also in children with AR,  
16  
17 276 sensitization patterns don't have added value if the medical history clearly suggests e.g. a pollen allergy (43).  
18  
19  
20 277 Only when the cause of the rhinitis is uncertain, the determination of sensitization patterns adds value. The  
21  
22 278 medical guidelines for asthma in children advises to determine sensitization patterns (44), since it can help  
23  
24 279 diagnose allergic asthma (45) and because it could have clinical consequences. Finally, it is important to  
25  
26 280 acknowledge the uncertainty of general practitioners to make a diagnosis of asthma or AR in young children  
27  
28  
29 281 (e.g. under the age of six).

### 30 31 32 282 **Implications for future research and practice**

33  
34  
35 283 First of all, could comorbidity data be used to create proxies that could support GPs in identifying atopic  
36  
37 284 children that are not labeled as such? For example, could comorbidity data be incorporated in 'clinical decision  
38  
39  
40 285 support systems' to improve early diagnosis of both atopic and non-atopic disorders. Second of all, how is the  
41  
42 286 quality of life of these atopic children affected by the associated comorbidity? GPs should be aware of the  
43  
44 287 described associations when treating an atopic child, since the quality of life of an atopic child could be  
45  
46 288 improved by paying more attention to diagnosis and treatment of these related disorders. Furthermore, one  
47  
48  
49 289 must be aware that atopic disorders and associated symptoms and diseases may well persist into adulthood.  
50

### 51 52 290 **Conclusions**

53  
54  
55 291 The present study shows that atopic children have an increased risk of clinically relevant comorbidity, both  
56  
57 292 atopic and non-atopic. General practitioners may not always be fully aware of relevant atopic and non-atopic  
58  
59  
60



1  
2  
3  
4  
5  
6  
7  
8  
9  
10  
11  
12  
13  
14  
15  
16  
17  
18  
19  
20  
21  
22  
23  
24  
25  
26  
27  
28  
29  
30  
31  
32  
33  
34  
35  
36  
37  
38  
39  
40  
41  
42  
43  
44  
45  
46  
47  
48  
49  
50  
51  
52  
53  
54  
55  
56  
57  
58  
59  
60

293 comorbidity. In children known to have at least one atopic disorder, specific attention is required to avoid  
294 possible insufficient treatment and unnecessary loss of quality of life.

For peer review only

## Acknowledgments

The authors thank Petra ten Veen (database specialist, NIVEL) for her help with the selection of eligible patients and Samana Jamsheed for her help with the data extraction.

## Competing Interests

We have read and understood BMJ policy on declaration of interests and declare that we have no competing interests.

## Contributions

Study conception and design: DP, MN, JK, PB, AB

Acquisition of data: DP, MN

Analysis and interpretation of data: DP, MN

Drafting of manuscript: DP

Critical revision: MN, JK, PB, AB

Guarantor: MN, AB

## Funding

This research received no specific grant from any funding agency in the public, commercial or not-for-profit sectors.

1  
2  
3  
4  
5  
6  
7  
8  
9  
10  
11  
12  
13  
14  
15  
16  
17  
18  
19  
20  
21  
22  
23  
24  
25  
26  
27  
28  
29  
30  
31  
32  
33  
34  
35  
36  
37  
38  
39  
40  
41  
42  
43  
44  
45  
46  
47  
48  
49  
50  
51  
52  
53  
54  
55  
56  
57  
58  
59  
60

311 **Data sharing statement**

312 Data will be available from the repository of Data Archiving and Networked Services (DANS;  
313 [www.dans.knaw.nl](http://www.dans.knaw.nl)).

For peer review only

## References

1. Van der Linden MW, Van Suijlekom-Smit LWA, Schellevis FG, Van der Wouden JC. Tweede Nationale Studie naar ziekten en verrichtingen in de huisartspraktijk. Culemborg 2005. p. 38.
2. Jacob L, Keil T, Kostev K. Comorbid disorders associated with asthma in children in Germany - National analysis of pediatric primary care data. *Pediatr Allergy Immunol*. 2016;27(8):861-6. Epub 2016/09/11.
3. Fsadni P, Fsadni C, Fava S, Montefort S. Correlation of worldwide incidence of type 1 diabetes (DiaMond) with prevalence of asthma and atopic eczema (ISAAC). *Clin Respir J*. 2012;6(1):18-25.
4. Huang SW, Hitchcock J. Influence of the TH1/TH2 paradigm: The prevalence of asthma and allergic diseases in patients with type 1 diabetes in the United States. *Pediatr Asthma Allergy Immunol*. 2002;15(4):195-9.
5. Villa-Nova H, Spinola-Castro AM, Garcia FE, Sole D. Prevalence of allergic diseases and/or allergic sensitisation in children and adolescents with type 1 diabetes mellitus. *Allergol Immunopathol*. 2015;43(2):157-61.
6. Chen MH, Su TP, Chen YS, Hsu JW, Huang KL, Chang WH, et al. Asthma and attention-deficit/hyperactivity disorder: a nationwide population-based prospective cohort study. *J Child Psychol Psychiatry*. 2013;54(11):1208-14.
7. Chen MH, Su TP, Chen YS, Hsu JW, Huang KL, Chang WH, et al. Is atopy in early childhood a risk factor for ADHD and ASD? a longitudinal study. *J Psychosom Res*. 2014;77(4):316-21.
8. Schmitt J, Apfelbacher C, Heinrich J, Weidinger S, Romanos M. Association of atopic eczema and attention-deficit/hyperactivity disorder - Meta-analysis of epidemiologic studies. *Z Kinder- Jugendpsychiatr Psychother*. 2013;41(1):35-44.
9. Chen MH, Su TP, Chen YS, Hsu JW, Huang KL, Chang WH, et al. Comorbidity of allergic and autoimmune diseases in patients with autism spectrum disorder: A nationwide population-based study. *Res Autism Spectr Disord*. 2013;7(2):205-12.
10. Jyonouchi H. Autism spectrum disorders and allergy: Observation from a pediatric allergy/immunology clinic. *Expert Rev Clin Immunol*. 2010;6(3):397-411.
11. Lin TY, Lin PY, Su TP, Chen YS, Hsu JW, Huang KL, et al. Autistic spectrum disorder, attention deficit hyperactivity disorder, and allergy: Is there a link? A nationwide study. *Res Autism Spectr Disord*. 2014;8(10):1333-8.
12. Yao TC, Ou LS, Yeh KW, Lee WI, Chen LC, Huang JL. Associations of age, gender, and BMI with prevalence of allergic diseases in children: PATCH study. *J Asthma*. 2011;48(5):503-10.
13. Kreissl S, Radon K, Dressel H, Genuneit J, Kellberger J, Nowak D, et al. Body mass index change and atopic diseases are not always associated in children and adolescents. *Ann Allergy Asthma Immunol*. 2014;113(4):440-4.e1.
14. Weinmayr G, Forastiere F, Buchele G, Jaensch A, Strachan DP, Nagel G. Overweight/obesity and respiratory and allergic disease in children: International study of asthma and allergies in childhood (Isaac) phase two. *PLoS ONE*. 2014;9(12).
15. Juntti H, Kokkonen J, Dunder T, Renko M, Niinimäki A, Uhari M. Association of an early respiratory syncytial virus infection and atopic allergy. *Allergy Eur J Allergy Clin Immunol*. 2003;58(9):878-84.
16. Sidorchuk A, Wickman M, Pershagen G, Lagarde F, Linde A. Cytomegalovirus infection and development of allergic diseases in early childhood: Interaction with EBV infection? *J Allergy Clin Immunol*. 2004;114(6):1434-40.
17. Koponen P, Helminen M, Paasilta M, Luukkaala T, Korppi M. Preschool asthma after bronchiolitis in infancy. *Eur Respir J*. 2012;39(1):76-80.

- 1  
2  
3 358 18. MacIntyre EA, Heinrich J. Otitis media in infancy and the development of asthma and atopic disease.  
4 359 *Curr Allergy Asthma Rep.* 2012;12(6):547-50.
- 5 360 19. Alles R, Parikh A, Hawk L, Darby Y, Romero JN, Scadding G. The prevalence of atopic disorders in  
6 361 children with chronic otitis media with effusion. *Pediatr Allergy Immunol.* 2001;12(2):102-6.
- 7 362 20. Caffarelli C, Savini E, Giordano S, Gianlupi G, Cavagni G. Atopy in children with otitis media with  
8 363 effusion. *Clin Exp Allergy.* 1998;28(5):591-6.
- 9 364 21. Kwon C, Lee HY, Kim MG, Boo SH, Yeo SG. Allergic diseases in children with otitis media with effusion.  
10 364 *Int J Pediatr Otorhinolaryngol.* 2013;77(2):158-61.
- 11 365 22. Nielen MMJ, Spronk I, Davids R, Zwaanswijk M, Verheij RA, JC K. Accountability incidence and  
12 366 prevalence of health problems in the Dutch general practice in 2012. *Nivel*; 2012 [cited 2015 20-4]; Available  
13 367 from: [www.nivel.nl/node/3619](http://www.nivel.nl/node/3619).
- 14 368 23. Lamberts H, Wood M. The birth of the International Classification of Primary Care (ICPC). Serendipity at  
15 369 the border of Lac Lemman. *Fam pract.* 2002;19(5):433-5.
- 16 370 24. Soler JK, Okkes I, Wood M, Lamberts H. The coming of age of ICPC: celebrating the 21st birthday of the  
17 371 International Classification of Primary Care. *Fam pract.* 2008;25(4):312-7.
- 18 372 25. de Lusignan S, van Weel C. The use of routinely collected computer data for research in primary care:  
19 373 opportunities and challenges. *Fam pract.* 2006;23(2):253-63.
- 20 374 26. Hippisley-Cox J, Hammersley V, Pringle M, Coupland C, Crown N, Wright L. How useful are General  
21 375 Practice Databases for research? analysis of the accuracy and completeness in one research network. *Health  
22 376 Inform J* 2004;10:91-109.
- 23 377 27. Britt H, Angelis M, Harris E. The reliability and validity of doctor-recorded morbidity data in active data  
24 378 collection systems. *Scand J Prim Health Care.* 1998;16(1):50-5.
- 25 379 28. Hupkens C, Swinkels H. Ongeveer drie kwart bezoekt jaarlijks huisarts en tandarts. CBS; 2013 [updated  
26 380 2-7-2013 09.3020-10-2016]; Available from: [https://www.cbs.nl/nl-nl/nieuws/2013/27/ongeveer-drie-kwart-  
27 381 bezoekt-jaarlijks-huisarts-en-tandarts](https://www.cbs.nl/nl-nl/nieuws/2013/27/ongeveer-drie-kwart-bezoekt-jaarlijks-huisarts-en-tandarts).
- 28 382 29. Pols DHJ, Nielen MMJ, Korevaar JC, Bindels PJ, Bohnen AM. Reliably estimating prevalences of atopic  
29 383 children: an epidemiological study in an extensive and representative primary care database. *NPJ Prim Care  
30 384 Respir Med* (in press). 2017.
- 31 385 30. Pols DH, Wartna JB, van Alphen EI, Moed H, Rasenberg N, Bindels PJ, et al. Interrelationships between  
32 386 Atopic Disorders in Children: A Meta-Analysis Based on ISAAC Questionnaires. *PLoS One.* 2015;10(7):e0131869.
- 33 387 31. Miyagaki T, Sugaya M. Recent advances in atopic dermatitis and psoriasis: genetic background, barrier  
34 388 function, and therapeutic targets. *J Dermatol Sci.* 2015;78(2):89-94. Epub 2015/03/17.
- 35 389 32. Deliu M, Belgrave D, Simpson A, Murray CS, Kerry G, Custovic A. Impact of rhinitis on asthma severity in  
36 390 school-age children. *Allergy Eur J Allergy Clin Immunol.* 2014;69(11):1515-21.
- 37 391 33. Powell N, Huntley B, Beech T, Knight W, Knight H, Corrigan CJ. Increased prevalence of gastrointestinal  
38 392 symptoms in patients with allergic disease. *Postgrad Med J.* 2007;83(977):182-6.
- 39 393 34. Cianferoni A, Spergel J. Eosinophilic Esophagitis: A Comprehensive Review. *Clin Rev Allergy Immunol.*  
40 394 2016;50(2):159-74.
- 41 395 35. Kappelman M, Galanko J, Porter C, Sandler R. Young faculty clinical investigator award association of  
42 396 pediatric inflammatory bowel disease with other immune-mediated diseases. *J Pediatr Gastroenterol Nutr.*  
43 397 2009;49:E67-E8.
- 44 398 36. Kappelman MD, Galanko JA, Porter CQ, Sandler RS. Association of paediatric inflammatory bowel  
45 399 disease with other immune-mediated diseases. *Arch Dis Child.* 2011;96(11):1042-6.
- 46 400 37. Linabery AM, Jurek AM, Duval S, Ross JA. The association between atopy and childhood/adolescent  
47 401 leukemia: A meta-analysis. *Am J Epidemiol.* 2010;171(7):749-64.
- 48 402 38. Hughes AM, Lightfoot T, Simpson J, Ansell P, McKinney PA, Kinsey SE, et al. Allergy and risk of childhood  
49 403 leukaemia: Results from the UKCCS. *Int J Cancer.* 2007;121(4):819-24.
- 50 404  
51  
52  
53  
54  
55  
56  
57  
58  
59  
60

- 1  
2  
3 405 39. Tzeng ST, Hsu SG, Fu LS, Chi CS. Prevalence of atopy in children with type 1 diabetes mellitus in central  
4 406 Taiwan. *J Microbiol Immunol Infect.* 2007;40(1):74-8.  
5 407 40. Meerwaldt R, Odink RJ, Landaeta R, Aarts F, Brunekreef B, Gerritsen J, et al. A lower prevalence of  
6 408 atopy symptoms in children with type 1 diabetes mellitus. *Clin Exp Allergy.* 2002;32(2):254-5.  
7 409 41. Dirven-Meijer PC, De Kock CA, Nonneman MMG, Van Sleeuwen D, De Witt-de Jong AWF, Burgers JS, et  
8 410 al. NHG-Standaard Eczeem. *Huisarts Wet* 2014;57(5):240-52.  
9 411 42. Flohr C, Johansson SG, Wahlgren CF, Williams H. How atopic is atopic dermatitis? *J Allergy Clin*  
10 412 *Immunol.* 2004;114(1):150-8. Epub 2004/07/09.  
11 413 43. Sachs APE, Berger MY, Lucassen PLBJ, Van der Wal J, Van Balen JAM, Verduijn MM. NHG-Standaard  
12 414 Allergische en niet-allergische rhinitis (Eerste herziening) *Huisarts Wet* 2006;49(5):254-65.  
13 415 44. Bindels PJE, Van de Griendt EJ, Grol MH, Van Hensbergen W, Steenkamer TA, Uijen JHJM, et al. NHG-  
14 416 Standaard Astma bij kinderen (Derde herziening). *Huisarts Wet* 2014;57(2):70-80.  
15 417 45. Eysink PE, ter Riet G, Aalberse RC, van Aalderen WM, Roos CM, van der Zee JS, et al. Accuracy of  
16 418 specific IgE in the prediction of asthma: development of a scoring formula for general practice. *Br J Gen Pract.*  
17 419 2005;55(511):125-31.  
18  
19  
20  
21  
22 420  
23  
24 421  
25  
26  
27  
28  
29  
30  
31  
32  
33  
34  
35  
36  
37  
38  
39  
40  
41  
42  
43  
44  
45  
46  
47  
48  
49  
50  
51  
52  
53  
54  
55  
56  
57  
58  
59  
60

## Figure legends

**Table 1.** General characteristics of the total study population

**Table 2.** Significantly ( $p \leq 0.001$ ) associated comorbidity in children diagnosed with only atopic eczema (Ec) and at least three year follow-up versus controls (non-atopic children) (n=31,060)

**Table 3.** Significantly ( $p \leq 0.001$ ) associated comorbidity in children diagnosed with only asthma (As) and at least three year follow-up versus controls (non-atopic children) (n=15,774)

**Table 4.** Significantly ( $p \leq 0.001$ ) associated comorbidity in children diagnosed with only allergic rhinitis (AR) and at least three year follow-up versus controls (non-atopic children) (n=13,670)

**Table 5.** Significantly ( $p \leq 0.001$ ) associated comorbidity in children diagnosed with Atopic Triad (AT) and at least three year follow-up versus controls (non-atopic children) (n= 1,118)

434 Table 1. General characteristics of the total study population

|                        | n      | Age in years<br>(SD) | Male  |
|------------------------|--------|----------------------|-------|
| Only atopic eczema     | 15,530 | 8.7 (4.5)            | 48.2% |
| Only asthma            | 7,887  | 10.7 (4.5)           | 59.0% |
| Only allergic rhinitis | 6,835  | 13.5 (3.5)           | 57.8% |
| Atopic triad           | 559    | 11.6 (4.0)           | 61.4% |

435 NB. Children in the first three groups had **only one** of the three atopic disorders: i.e. they had the disorder  
436 mentioned, but none of the **other** disorders, whereas children in the Atopic triad group had **all three** disorders.



Table 2. Significantly ( $p \leq 0.001$ ) associated comorbidity in children diagnosed with only atopic eczema (Ec) and at least three year follow-up versus controls (non-atopic children) (n=31,060).

| ICPC                                                   | Description ICPC codes                  | OR          | 95% CI             | Prevalence  |             | OR sex |      | OR age |      |       |
|--------------------------------------------------------|-----------------------------------------|-------------|--------------------|-------------|-------------|--------|------|--------|------|-------|
|                                                        |                                         |             |                    | Ec          | No Ec       | boy    | girl | 2-6    | 7-12 | 13-18 |
| <b>Skin-related diseases and symptoms</b>              |                                         |             |                    |             |             |        |      |        |      |       |
| S03                                                    | Warts                                   | 1.15        | 1.06 – 1.26        | 7.85        | 6.88        |        |      |        |      |       |
| S06                                                    | Rash localized <sup>1,2</sup>           | 1.51        | 1.25 – 1.82        | 1.76        | 1.18        | 1.11   | 2.02 | 1.29   | 1.54 | 2.30  |
| S99                                                    | Skin disease, other                     | 1.57        | 1.24 – 2.00        | 1.12        | 0.71        |        |      |        |      |       |
| S02                                                    | Pruritus                                | 1.71        | 1.31 – 2.23        | 0.97        | 0.57        |        |      |        |      |       |
| S84                                                    | Impetigo <sup>2</sup>                   | 1.71        | 1.54 – 1.90        | 6.23        | 3.75        |        |      | 1.54   | 1.78 | 2.72  |
| S04                                                    | Lump/swelling localized                 | 1.76        | 1.30 – 2.39        | 0.73        | 0.42        |        |      |        |      |       |
| S74                                                    | Dermatophytosis                         | 1.76        | 1.54 – 2.00        | 4.20        | 2.44        |        |      |        |      |       |
| S98                                                    | Urticaria                               | 1.77        | 1.50 – 2.09        | 2.49        | 1.42        |        |      |        |      |       |
| S21                                                    | Skin texture symptom/complaint          | 1.89        | 1.49 – 2.40        | 1.26        | 0.67        |        |      |        |      |       |
| S95                                                    | Molluscum contagiosum                   | 1.92        | 1.69 – 2.19        | 4.44        | 2.38        |        |      |        |      |       |
| S86                                                    | Dermatitis seborrhoeic                  | 2.31        | 1.87 – 2.84        | 1.89        | 0.83        |        |      |        |      |       |
| S91                                                    | Psoriasis                               | 3.36        | 2.23 – 5.06        | 0.64        | 0.19        |        |      |        |      |       |
| <b>Airway-related diseases and symptoms</b>            |                                         |             |                    |             |             |        |      |        |      |       |
| R05                                                    | Cough                                   | 1.29        | 1.17 – 1.43        | 5.94        | 4.67        |        |      |        |      |       |
| R74                                                    | Upper respiratory infection acute       | 1.33        | 1.23 – 1.43        | 10.42       | 8.13        |        |      |        |      |       |
| R78                                                    | Acute bronchitis/bronchiolitis          | 1.49        | 1.22 – 1.80        | 1.66        | 1.13        |        |      |        |      |       |
| R04                                                    | Breathing problem, other <sup>1</sup>   | <b>1.55</b> | <b>0.97 – 2.48</b> | <b>0.29</b> | <b>0.19</b> | 0.91   | 3.58 |        |      |       |
| R03                                                    | Wheezing                                | 1.95        | 1.30 – 2.92        | 0.45        | 0.23        |        |      |        |      |       |
| <b>Ear-nose-throat-related diseases and symptoms</b>   |                                         |             |                    |             |             |        |      |        |      |       |
| H71                                                    | Acute otitis media/myringitis           | 1.20        | 1.09 – 1.31        | 7.46        | 6.35        |        |      |        |      |       |
| H72                                                    | Serous otitis media                     | 1.40        | 1.21 – 1.62        | 2.92        | 2.11        |        |      |        |      |       |
| H01                                                    | Ear pain/earache                        | 1.43        | 1.24 – 1.65        | 3.01        | 2.13        |        |      |        |      |       |
| H04                                                    | Ear discharge                           | 1.47        | 1.17 – 1.86        | 1.13        | 0.77        |        |      |        |      |       |
| R21                                                    | Throat symptom/complaint                | 1.50        | 1.27 – 1.78        | 2.13        | 1.43        |        |      |        |      |       |
| H70                                                    | Otitis externa                          | 1.56        | 1.27 – 1.90        | 1.58        | 1.02        |        |      |        |      |       |
| R07                                                    | Sneezing/nasal congestion               | 1.95        | 1.32 – 2.89        | 0.48        | 0.24        |        |      |        |      |       |
| <b>Gastro-intestinal-related diseases and symptoms</b> |                                         |             |                    |             |             |        |      |        |      |       |
| D01                                                    | Abdominal pain/cramps general           | 1.27        | 1.12 – 1.45        | 3.61        | 2.85        |        |      |        |      |       |
| D12                                                    | Constipation                            | 1.32        | 1.19 – 1.47        | 5.29        | 4.07        |        |      |        |      |       |
| D87                                                    | Stomach function disorder <sup>1</sup>  | <b>1.48</b> | <b>0.87 – 2.51</b> | <b>0.22</b> | <b>0.15</b> | 0.69   | 3.29 |        |      |       |
| D99                                                    | Disease digestive system. other         | 2.28        | 1.51 – 3.44        | 0.48        | 0.21        |        |      |        |      |       |
| <b>Musculoskeletal</b>                                 |                                         |             |                    |             |             |        |      |        |      |       |
| L17                                                    | Foot/toe symptom/complaint              | 1.30        | 1.15 – 1.48        | 3.50        | 2.71        |        |      |        |      |       |
| L98                                                    | Acquired deformity of limb              | 1.39        | 1.20 – 1.60        | 2.90        | 2.11        |        |      |        |      |       |
| <b>Miscellaneous</b>                                   |                                         |             |                    |             |             |        |      |        |      |       |
| A04                                                    | Weakness/tiredness general              | 1.25        | 1.09 – 1.44        | 3.07        | 2.47        |        |      |        |      |       |
| S12                                                    | Insect bite / sting                     | 1.41        | 1.19 – 1.66        | 2.24        | 1.60        |        |      |        |      |       |
| F72                                                    | Blepharitis/stye/chalazion <sup>2</sup> | 1.53        | 1.22 – 1.93        | 1.20        | 0.79        |        |      | 0.96   | 2.79 | 1.76  |
| F70                                                    | Conjunctivitis infectious               | 1.53        | 1.29 – 1.81        | 2.18        | 1.44        |        |      |        |      |       |
| Y81                                                    | Phimosis/redundant prepuce              | 1.83        | 1.47 – 2.72        | 1.49        | 0.83        |        |      |        |      |       |
| F71                                                    | Conjunctivitis allergic                 | 1.99        | 1.59 – 2.49        | 1.45        | 0.73        |        |      |        |      |       |
| A12                                                    | Allergy                                 | 3.11        | 2.62 – 3.69        | 3.42        | 1.13        |        |      |        |      |       |

1. significant ( $p \leq 0.01$ ) influence of gender; 2. significant ( $p \leq 0.01$ ) influence of age

**Italics:** Overall model not significant

Table 3. Significantly ( $p \leq 0.001$ ) associated comorbidity in children diagnosed with only asthma (As) and at least three year follow-up versus controls (non-atopic children) (n=15,774)

| ICPC                                                   | Description ICPC codes                      | OR          | 95% CI             | Prevalence  |             | OR sex |      | OR age |      |       |
|--------------------------------------------------------|---------------------------------------------|-------------|--------------------|-------------|-------------|--------|------|--------|------|-------|
|                                                        |                                             |             |                    | As          | No As       | boy    | girl | 2-6    | 7-12 | 13-18 |
| <b>Skin-related diseases and symptoms</b>              |                                             |             |                    |             |             |        |      |        |      |       |
| S98                                                    | Urticaria                                   | 2.10        | 1.61 – 2.73        | 2.21        | 1.07        |        |      |        |      |       |
| <b>Airway-related diseases and symptoms</b>            |                                             |             |                    |             |             |        |      |        |      |       |
| R05                                                    | Cough                                       | 2.14        | 1.86 – 2.46        | 7.99        | 3.93        |        |      |        |      |       |
| R77                                                    | Laryngitis/tracheitis acute                 | 2.34        | 1.54 – 3.56        | 0.94        | 0.41        |        |      |        |      |       |
| R74                                                    | Upper respiratory infection                 | 2.35        | 2.09 – 2.64        | 12.34       | 5.78        |        |      |        |      |       |
| R81                                                    | Pneumonia                                   | 4.04        | 3.03 – 5.37        | 2.97        | 0.76        |        |      |        |      |       |
| R78                                                    | Acute bronchitis/bronchiolitis <sup>2</sup> | 4.80        | 3.78 – 6.11        | 4.79        | 1.05        |        |      | 3.74   | 5.63 | 8.09  |
| R91                                                    | Chronic bronchitis                          | 5.66        | 3.14–10.23         | 0.93        | 0.16        |        |      |        |      |       |
| R02                                                    | Shortness of breath/dyspnoea                | 7.74        | 5.05–11.87         | 2.31        | 0.30        |        |      |        |      |       |
| R03                                                    | Wheezing                                    | 10.30       | 4.73–22.42         | 0.90        | 0.09        |        |      |        |      |       |
| <b>Ear-nose-throat-related diseases and symptoms</b>   |                                             |             |                    |             |             |        |      |        |      |       |
| H76                                                    | Foreign body in ear <sup>1</sup>            | <b>0.86</b> | <b>0.40 – 1.85</b> | <b>0.15</b> | <b>0.18</b> | 2.51   | 0.20 |        |      |       |
| H01                                                    | Ear pain/earache                            | 1.45        | 1.16 – 1.81        | 2.46        | 1.71        |        |      |        |      |       |
| H71                                                    | Acute otitis media/myringitis               | 1.52        | 1.32 – 1.76        | 6.44        | 4.4         |        |      |        |      |       |
| H70                                                    | Otitis externa                              | 1.60        | 1.22 – 2.08        | 1.79        | 1.13        |        |      |        |      |       |
| R75                                                    | Sinusitis acute/chronic                     | 1.90        | 1.32 – 2.75        | 1.05        | 0.56        |        |      |        |      |       |
| <b>Gastro-intestinal-related diseases and symptoms</b> |                                             |             |                    |             |             |        |      |        |      |       |
| D89                                                    | Inguinal hernia <sup>1</sup>                | <b>0.76</b> | <b>0.37 – 1.57</b> | <b>0.16</b> | <b>0.22</b> | 0.27   | 4.52 |        |      |       |
| D01                                                    | Abdominal pain/cramps general               | 1.40        | 1.16 – 1.69        | 3.32        | 2.40        |        |      |        |      |       |
| D06                                                    | Abdominal pain localized other              | 1.43        | 1.15 – 1.77        | 2.59        | 1.83        |        |      |        |      |       |
| D12                                                    | Constipation                                | 1.44        | 1.22 – 1.70        | 4.43        | 3.12        |        |      |        |      |       |
| D73                                                    | Gastroenteritis, infection                  | 1.60        | 1.25 – 2.05        | 2.10        | 1.33        |        |      |        |      |       |
| D10                                                    | Vomiting                                    | 2.02        | 1.37 – 2.97        | 0.99        | 0.49        |        |      |        |      |       |
| D99                                                    | Disease digestive system, other             | 2.70        | 1.52 – 4.79        | 0.55        | 0.20        |        |      |        |      |       |
| <b>Musculoskeletal</b>                                 |                                             |             |                    |             |             |        |      |        |      |       |
| L15                                                    | Knee symptom/complaint <sup>2</sup>         | <b>1.11</b> | <b>0.90 – 1.37</b> | <b>2.42</b> | <b>2.18</b> |        |      | 1.34   | 1.49 | 0.97  |
| L12                                                    | Hand symptom/complaint <sup>1</sup>         | <b>1.37</b> | <b>1.09 – 1.71</b> | <b>2.27</b> | <b>1.67</b> | 1.00   | 2.13 |        |      |       |
| L98                                                    | Acquired deformity of limb                  | 1.40        | 1.16 – 1.68        | 3.54        | 2.56        |        |      |        |      |       |
| L99                                                    | Musculoskeletal disease, other              | 1.52        | 1.22 – 1.89        | 2.66        | 1.78        |        |      |        |      |       |
| L11                                                    | Wrist symptom/complaint                     | 1.98        | 1.48 – 2.65        | 1.71        | 0.87        |        |      |        |      |       |
| <b>Miscellaneous</b>                                   |                                             |             |                    |             |             |        |      |        |      |       |
| P21                                                    | ADHD                                        | 1.34        | 1.13 – 1.58        | 4.18        | 3.17        |        |      |        |      |       |
| A04                                                    | Weakness/tiredness general                  | 1.39        | 1.17 – 1.65        | 4.04        | 2.97        |        |      |        |      |       |
| N01                                                    | Headache                                    | 1.51        | 1.21 – 1.89        | 2.49        | 1.66        |        |      |        |      |       |
| F70                                                    | Conjunctivitis infectious                   | 1.72        | 1.31 – 2.27        | 1.78        | 1.04        |        |      |        |      |       |
| T10                                                    | Growth delay                                | 1.82        | 1.35 – 2.44        | 1.60        | 0.89        |        |      |        |      |       |
| T83                                                    | Overweight                                  | 2.09        | 1.41 – 3.10        | 0.98        | 0.47        |        |      |        |      |       |
| T82                                                    | Obesity                                     | 2.47        | 1.50 – 4.05        | 0.68        | 0.28        |        |      |        |      |       |
| F71                                                    | Conjunctivitis allergic                     | 2.55        | 1.85 – 3.49        | 1.72        | 0.68        |        |      |        |      |       |
| A12                                                    | Allergy                                     | 3.40        | 2.74 – 4.23        | 4.55        | 1.38        |        |      |        |      |       |

1. significant ( $p \leq 0.01$ ) influence of gender; 2. significant ( $p \leq 0.01$ ) influence of age

**Italics:** Overall model not significant

Table 4. Significantly ( $p \leq 0.001$ ) associated comorbidity in children diagnosed with only allergic rhinitis (AR) and at least three year follow-up versus controls (non-atopic children) ( $n=13,670$ )

| ICPC                                                   | Description ICPC codes                          | OR          | 95% CI             | Prevalence  |             | OR sex |      | OR age |      |       |
|--------------------------------------------------------|-------------------------------------------------|-------------|--------------------|-------------|-------------|--------|------|--------|------|-------|
|                                                        |                                                 |             |                    | AR          | No AR       | boy    | girl | 2-6    | 7-12 | 13-18 |
| <b>Skin-related diseases and symptoms</b>              |                                                 |             |                    |             |             |        |      |        |      |       |
| A76                                                    | Viral exanthem other <sup>2</sup>               | <b>0.86</b> | <b>0.47 – 1.60</b> | <b>0.28</b> | <b>0.32</b> |        |      | 0.32   | 0.64 | 4.51  |
| S03                                                    | Warts                                           | 1.26        | 1.10 – 1.43        | 7.65        | 6.20        |        |      |        |      |       |
| S74                                                    | Dermatophytosis                                 | 1.39        | 1.15 – 1.68        | 3.85        | 2.79        |        |      |        |      |       |
| S82                                                    | Naevus/mole                                     | 1.39        | 1.15 – 1.67        | 3.99        | 2.91        |        |      |        |      |       |
| S84                                                    | Impetigo                                        | 1.71        | 1.35 – 2.15        | 2.87        | 1.71        |        |      |        |      |       |
| S98                                                    | Urticaria                                       | 1.71        | 1.31 – 2.23        | 2.15        | 1.27        |        |      |        |      |       |
| S86                                                    | Dermatitis seborrheic                           | 1.86        | 1.38 – 2.53        | 1.76        | 0.95        |        |      |        |      |       |
| S02                                                    | Pruritus                                        | 2.21        | 1.44 – 3.38        | 0.99        | 0.45        |        |      |        |      |       |
| <b>Airway-related diseases and symptoms</b>            |                                                 |             |                    |             |             |        |      |        |      |       |
| R05                                                    | Cough                                           | 1.89        | 1.58 – 2.25        | 5.24        | 2.85        |        |      |        |      |       |
| R74                                                    | Upper respiratory infection acute               | 1.92        | 1.66 – 2.23        | 8.00        | 4.35        |        |      |        |      |       |
| R78                                                    | Acute bronchitis/bronchiolitis                  | 2.32        | 1.60 – 3.37        | 1.35        | 0.59        |        |      |        |      |       |
| R02                                                    | Shortness of breath/dyspnoe                     | 2.67        | 1.74 – 4.11        | 1.13        | 0.42        |        |      |        |      |       |
| R80                                                    | Influenza                                       | 3.89        | 1.79 – 8.47        | 0.45        | 0.12        |        |      |        |      |       |
| R03                                                    | Wheezing                                        | 4.30        | 1.89 – 9.80        | 0.44        | 0.10        |        |      |        |      |       |
| <b>Ear-nose-throat-related diseases and symptoms</b>   |                                                 |             |                    |             |             |        |      |        |      |       |
| R21                                                    | Throat symptom/complaint                        | 1.48        | 1.20 – 1.84        | 3.13        | 2.14        |        |      |        |      |       |
| H01                                                    | Ear pain/earache                                | 1.87        | 1.36 – 2.56        | 1.62        | 0.88        |        |      |        |      |       |
| R90                                                    | Hypertrophy tonsils/adenoids <sup>2</sup>       | 1.92        | 1.34 – 2.74        | 1.30        | 0.69        |        |      | 3.22   | 2.80 | 1.04  |
| R75                                                    | Sinusitis acute/chronic                         | 1.95        | 1.45 – 2.63        | 1.89        | 0.98        |        |      |        |      |       |
| R08                                                    | Nose symptom/complaint other                    | 2.62        | 1.72 – 4.00        | 1.14        | 0.44        |        |      |        |      |       |
| R07                                                    | Sneezing/nasal congestion                       | 3.93        | 2.57 – 6.01        | 1.54        | 0.40        |        |      |        |      |       |
| <b>Gastro-intestinal-related diseases and symptoms</b> |                                                 |             |                    |             |             |        |      |        |      |       |
| D12                                                    | Constipation                                    | 1.50        | 1.23 – 1.82        | 3.79        | 2.57        |        |      |        |      |       |
| D06                                                    | Abdominal pain localized other                  | 1.76        | 1.39 – 2.22        | 2.90        | 1.67        |        |      |        |      |       |
| D73                                                    | Gastroenteritis presumed infection <sup>1</sup> | 1.96        | 1.42 – 2.71        | 1.59        | 0.82        | 1.29   | 3.39 |        |      |       |
| <b>Musculoskeletal</b>                                 |                                                 |             |                    |             |             |        |      |        |      |       |
| L98                                                    | Acquired deformity of limb                      | 1.36        | 1.15 – 1.62        | 4.54        | 3.37        |        |      |        |      |       |
| L17                                                    | Foot/toe symptom/complaint                      | 1.42        | 1.19 – 1.70        | 4.40        | 3.15        |        |      |        |      |       |
| L13                                                    | Hip symptom/complaint                           | 2.80        | 1.66 – 4.74        | 0.78        | 0.28        |        |      |        |      |       |
| <b>Miscellaneous</b>                                   |                                                 |             |                    |             |             |        |      |        |      |       |
| N19                                                    | Speech disorder <sup>1</sup>                    | <b>1.18</b> | <b>0.85 – 1.65</b> | <b>1.17</b> | <b>0.99</b> | 0.89   | 2.43 |        |      |       |
| N01                                                    | Headache                                        | 1.45        | 1.18 – 1.78        | 3.29        | 2.30        |        |      |        |      |       |
| P24                                                    | Specific learning problem                       | 1.45        | 1.18 – 1.78        | 3.37        | 2.37        |        |      |        |      |       |
| A04                                                    | Weakness/tiredness general                      | 1.58        | 1.35 – 1.85        | 6.10        | 3.96        |        |      |        |      |       |
| F70                                                    | Conjunctivitis infectious                       | 1.73        | 1.28 – 2.32        | 1.76        | 1.02        |        |      |        |      |       |
| S12                                                    | Insect bite/sting                               | 1.92        | 1.40 – 2.63        | 1.67        | 0.88        |        |      |        |      |       |
| F72                                                    | Blepharitis/stye/chalazion <sup>1</sup>         | 1.95        | 1.36 – 2.79        | 1.27        | 0.66        | 1.21   | 3.29 |        |      |       |
| A12                                                    | Allergy                                         | 4.02        | 3.15 – 5.13        | 4.70        | 1.21        |        |      |        |      |       |
| F71                                                    | Conjunctivitis allergic                         | 5.44        | 4.08 – 7.25        | 4.29        | 0.82        |        |      |        |      |       |

1. significant ( $p \leq 0.01$ ) influence of gender; 2. significant ( $p \leq 0.01$ ) influence of age

**Italics:** Overall model not significant

Table 5. Significantly ( $p \leq 0.001$ ) associated comorbidity in children diagnosed with Atopic Triad (AT) and at least three year follow-up versus controls (non-atopic children) (n= 1,118)

| ICPC | Description ICPC codes            | OR    | 95% CI |   | Prevalence |             |      |
|------|-----------------------------------|-------|--------|---|------------|-------------|------|
|      |                                   |       |        |   | A. triad   | No A. triad |      |
| R05  | Cough                             | 2.42  | 1.43   | - | 4.10       | 8.59        | 3.76 |
| L17  | Foot/toe symptom/complaint        | 3.25  | 1.63   | - | 6.50       | 6.08        | 1.97 |
| R74  | Upper respiratory infection acute | 3.75  | 2.33   | - | 6.04       | 14.13       | 4.29 |
| F71  | Conjunctivitis allergic           | 6.79  | 2.35   | - | 19.60      | 4.65        | 0.72 |
| A12  | Allergy                           | 17.83 | 7.15   | - | 44.43      | 13.77       | 0.89 |

## Appendix 1

| ICPC codes | Description                          |
|------------|--------------------------------------|
| A03        | Fever                                |
| A04        | Weakness/tiredness general           |
| A12        | Allergic reaction                    |
| A15        | Excessive crying infant              |
| A16        | Irritable infant                     |
| A70        | Tuberculosis                         |
| A71        | Measles                              |
| A72        | Chickenpox                           |
| A73        | Malaria                              |
| A74        | Rubella                              |
| A75        | Infectious mononucleosis             |
| A76        | Viral exanthem other                 |
| A77        | Viral disease other/NOS              |
| A78        | Infectious disease other/NOS         |
| A79        | Malignancy NOS                       |
| A84        | Poisoning by medical agent           |
| A85        | Adverse effect medical agent         |
| A86        | Toxic effect non-medicinal substance |
| A87        | Complication of medical treatment    |
| A88        | Adverse effect physical factor       |
| A90        | Congenital anomaly OS/multiple       |
| A92        | Allergy/allergic reaction NOS        |
| A93        | Premature newborn                    |
| A94        | Perinatal morbidity other            |
| A95        | Perinatal mortality                  |
| A96        | Death                                |
| B02        | Lymph gland(s) enlarged/painful      |
| B70        | Lymphadenitis acute                  |
| B71        | Lymphadenitis non-specific           |
| B72        | Hodgkin's disease/lymphoma           |
| B73        | Leukaemia                            |
| B74        | Malignant neoplasm blood other       |
| B75        | Benign/unspecified neoplasm blood    |
| B78        | Hereditary haemolytic anaemia        |
| B79        | Congen.anom. blood/lymph other       |
| B80        | Iron deficiency anaemia              |
| B81        | Anaemia, Vitamin B12/folate def.     |
| B82        | Anaemia other/unspecified            |
| B83        | Purpura/coagulation defect           |

|    |     |                                      |
|----|-----|--------------------------------------|
| 1  |     |                                      |
| 2  |     |                                      |
| 3  | B84 | Unexplained abnormal white cells     |
| 4  | B87 | Splenomegaly                         |
| 5  | B90 | HIV-infection/aids                   |
| 6  | D01 | Abdominal pain/cramps general        |
| 7  | D02 | Abdominal pain epigastric            |
| 8  | D03 | Heartburn                            |
| 9  | D04 | Rectal/anal pain                     |
| 10 | D05 | Perianal itching                     |
| 11 | D06 | Abdominal pain localized other       |
| 12 | D07 | Dyspepsia/indigestion                |
| 13 | D08 | Flatulence/gas/belching              |
| 14 | D09 | Nausea                               |
| 15 | D10 | Vomiting                             |
| 16 | D11 | Diarrhoea                            |
| 17 | D12 | Constipation                         |
| 18 | D13 | Jaundice                             |
| 19 | D22 | Parasites                            |
| 20 | D70 | Gastrointestinal infection           |
| 21 | D71 | Mumps                                |
| 22 | D72 | Viral hepatitis                      |
| 23 | D73 | Gastroenteritis presumed infection   |
| 24 | D74 | Malignant neoplasm stomach           |
| 25 | D75 | Malignant neoplasm colon/rectum      |
| 26 | D76 | Malignant neoplasm pancreas          |
| 27 | D77 | Malig. neoplasm digest other/NOS     |
| 28 | D78 | Neoplasm digest benign/uncertain     |
| 29 | D79 | Foreign body digestive system        |
| 30 | D81 | Congen. anomaly digestive system     |
| 31 | D83 | Mouth/tongue/lip disease             |
| 32 | D84 | Oesophagus disease                   |
| 33 | D85 | Duodenal ulcer                       |
| 34 | D86 | Peptic ulcer other                   |
| 35 | D87 | Stomach function disorder            |
| 36 | D88 | Appendicitis                         |
| 37 | D89 | Inguinal hernia                      |
| 38 | D90 | Hiatus hernia                        |
| 39 | D91 | Abdominal hernia other               |
| 40 | D92 | Diverticular disease                 |
| 41 | D93 | Irritable bowel syndrome             |
| 42 | D94 | Chronic enteritis/ulcerative colitis |
| 43 | D95 | Anal fissure/perianal abscess        |
| 44 | D96 | Worms/other parasites                |
| 45 | D97 | Liver disease NOS                    |
| 46 |     |                                      |
| 47 |     |                                      |
| 48 |     |                                      |
| 49 |     |                                      |
| 50 |     |                                      |
| 51 |     |                                      |
| 52 |     |                                      |
| 53 |     |                                      |
| 54 |     |                                      |
| 55 |     |                                      |
| 56 |     |                                      |
| 57 |     |                                      |
| 58 |     |                                      |
| 59 |     |                                      |
| 60 |     |                                      |

|    |     |                                  |
|----|-----|----------------------------------|
| 1  |     |                                  |
| 2  |     |                                  |
| 3  |     |                                  |
| 4  | D98 | Cholecystitis/cholelithiasis     |
| 5  | D99 | Disease digestive system, other  |
| 6  | F01 | Eye pain                         |
| 7  | F02 | Red eye                          |
| 8  | F03 | Eye discharge                    |
| 9  | F04 | Visual floaters/spots            |
| 10 | F05 | Visual disturbance other         |
| 11 | F70 | Conjunctivitis infectious        |
| 12 | F71 | Conjunctivitis allergic          |
| 13 | F72 | Blepharitis/stye/chalazion       |
| 14 | F73 | Eye infection/inflammation other |
| 15 | F74 | Neoplasm of eye/adnexa           |
| 16 | F75 | Contusion/haemorrhage eye        |
| 17 | F76 | Foreign body in eye              |
| 18 | F80 | Blocked lacrimal duct of infant  |
| 19 | F81 | Congenital anomaly eye other     |
| 20 | F82 | Detached retina                  |
| 21 | F83 | Retinopathy                      |
| 22 | F84 | Macular degeneration             |
| 23 | F85 | Corneal ulcer                    |
| 24 | F86 | Trachoma                         |
| 25 | F91 | Refractive error                 |
| 26 | F92 | Cataract                         |
| 27 | F93 | Glaucoma                         |
| 28 | F94 | Blindness                        |
| 29 | F95 | Strabismus                       |
| 30 | F99 | Eye/adnexa disease, other        |
| 31 | H01 | Ear pain/earache                 |
| 32 | H02 | Hearing complaint                |
| 33 | H03 | Tinnitus, ringing/buzzing ear    |
| 34 | H04 | Ear discharge                    |
| 35 | H05 | Bleeding ear                     |
| 36 | H70 | Otitis externa                   |
| 37 | H71 | Acute otitis media/myringitis    |
| 38 | H72 | Serous otitis media              |
| 39 | H73 | Eustachian salpingitis           |
| 40 | H74 | Chronic otitis media             |
| 41 | H75 | Neoplasm of ear                  |
| 42 | H76 | Foreign body in ear              |
| 43 | H77 | Perforation ear drum             |
| 44 | H80 | Congenital anomaly of ear        |
| 45 | H81 | Excessive ear wax                |
| 46 | H82 | Vertiginous syndrome             |
| 47 |     |                                  |
| 48 |     |                                  |
| 49 |     |                                  |
| 50 |     |                                  |
| 51 |     |                                  |
| 52 |     |                                  |
| 53 |     |                                  |
| 54 |     |                                  |
| 55 |     |                                  |
| 56 |     |                                  |
| 57 |     |                                  |
| 58 |     |                                  |
| 59 |     |                                  |
| 60 |     |                                  |

|    |     |                                     |
|----|-----|-------------------------------------|
| 1  |     |                                     |
| 2  |     |                                     |
| 3  |     |                                     |
| 4  | H83 | Otosclerosis                        |
| 5  | H86 | Deafness                            |
| 6  | K01 | Heart pain                          |
| 7  | K02 | Pressure/tightness of heart         |
| 8  | K04 | Palpitations/awareness of heart     |
| 9  | K05 | Irregular heartbeat other           |
| 10 | K07 | Swollen ankles/oedema               |
| 11 | K29 | Cardiovascular sympt./complt. other |
| 12 | K70 | Infection of circulatory system     |
| 13 | K71 | Rheumatic fever/heart disease       |
| 14 | K72 | Neoplasm cardiovascular             |
| 15 | K73 | Congenital anomaly cardiovascular   |
| 16 | K74 | Ischaemic heart disease w. angina   |
| 17 | K75 | Acute myocardial infarction         |
| 18 | K76 | Ischaemic heart disease w/o angina  |
| 19 | K77 | Heart failure                       |
| 20 | K78 | Atrial fibrillation/flutter         |
| 21 | K79 | Paroxysmal tachycardia              |
| 22 | K80 | Cardiac arrhythmia NOS              |
| 23 | K81 | Heart/arterial murmur NOS           |
| 24 | K82 | Pulmonary heart disease             |
| 25 | K83 | Heart valve disease NOS             |
| 26 | K84 | Heart disease other                 |
| 27 | K85 | Elevated blood pressure             |
| 28 | K86 | Hypertension uncomplicated          |
| 29 | K87 | Hypertension complicated            |
| 30 | K88 | Postural hypotension                |
| 31 | K89 | Transient cerebral ischaemia        |
| 32 | K90 | Stroke/cerebrovascular accident     |
| 33 | K91 | Cerebrovascular disease             |
| 34 | K92 | Atherosclerosis/PVD                 |
| 35 | K93 | Pulmonary embolism                  |
| 36 | K94 | Phlebitis/thrombophlebitis          |
| 37 | K95 | Varicose veins of leg               |
| 38 | K96 | Haemorrhoids                        |
| 39 | K99 | Cardiovascular disease other        |
| 40 | L01 | Neck symptom/complain               |
| 41 | L02 | Back symptom/complaint              |
| 42 | L03 | Low back symptom/complaint          |
| 43 | L04 | Chest symptom/complaint             |
| 44 | L05 | Flank symptom/complaint             |
| 45 | L06 | Axilla symptom/complaint            |
| 46 | L07 | Jaw symptom/complaint               |
| 47 |     |                                     |
| 48 |     |                                     |
| 49 |     |                                     |
| 50 |     |                                     |
| 51 |     |                                     |
| 52 |     |                                     |
| 53 |     |                                     |
| 54 |     |                                     |
| 55 |     |                                     |
| 56 |     |                                     |
| 57 |     |                                     |
| 58 |     |                                     |
| 59 |     |                                     |
| 60 |     |                                     |



|    |     |                                    |
|----|-----|------------------------------------|
| 1  |     |                                    |
| 2  |     |                                    |
| 3  |     |                                    |
| 4  | L08 | Shoulder symptom/complaint         |
| 5  | L09 | Arm symptom/complaint              |
| 6  | L10 | Elbow symptom/complaint            |
| 7  | L11 | Wrist symptom/complaint            |
| 8  | L12 | Hand/finger symptom/complaint      |
| 9  | L13 | Hip symptom/complaint              |
| 10 | L14 | Leg/thigh symptom/complaint        |
| 11 | L15 | Knee symptom/complaint             |
| 12 | L16 | Ankle symptom/complaint            |
| 13 | L17 | Foot/toe symptom/complaint         |
| 14 | L18 | Muscle pain                        |
| 15 | L19 | Muscle symptom/complaint NOS       |
| 16 | L20 | Joint symptom/complaint NOS        |
| 17 | L70 | Infections musculoskeletal system  |
| 18 | L71 | Malignant neoplasm musculoskeletal |
| 19 | L82 | Congenital anomaly musculoskeletal |
| 20 | L83 | Neck syndrome                      |
| 21 | L84 | Back syndrome w/o radiating pain   |
| 22 | L85 | Acquired deformity of spine        |
| 23 | L86 | Back syndrome with radiating pain  |
| 24 | L87 | Bursitis/tendinitis/synovitis NOS  |
| 25 | L88 | Rheumatoid/seropositive arthritis  |
| 26 | L92 | Shoulder syndrome                  |
| 27 | L93 | Tennis elbow                       |
| 28 | L94 | Osteochondrosis                    |
| 29 | L95 | Osteoporosis                       |
| 30 | L97 | Neoplasm benign/unspec musculo.    |
| 31 | L98 | Acquired deformity of limb         |
| 32 | L99 | Musculoskeletal disease, other     |
| 33 | N01 | Headache                           |
| 34 | N02 | Tension headache                   |
| 35 | N03 | Pain face                          |
| 36 | N04 | Restless legs                      |
| 37 | N05 | Tingling fingers/feet/toes         |
| 38 | N06 | Sensation disturbance other        |
| 39 | N07 | Convulsion/seizure                 |
| 40 | N16 | Disturbance of smell/taste         |
| 41 | N17 | Vertigo/dizziness                  |
| 42 | N18 | Paralysis/weakness                 |
| 43 | N19 | Speech disorder                    |
| 44 | N70 | Poliomyelitis                      |
| 45 | N71 | Meningitis/encephalitis            |
| 46 | N72 | Tetanus                            |
| 47 |     |                                    |
| 48 |     |                                    |
| 49 |     |                                    |
| 50 |     |                                    |
| 51 |     |                                    |
| 52 |     |                                    |
| 53 |     |                                    |
| 54 |     |                                    |
| 55 |     |                                    |
| 56 |     |                                    |
| 57 |     |                                    |
| 58 |     |                                    |
| 59 |     |                                    |
| 60 |     |                                    |

|    |     |                                   |
|----|-----|-----------------------------------|
| 1  |     |                                   |
| 2  |     |                                   |
| 3  |     |                                   |
| 4  | N73 | Neurological infection other      |
| 5  | N74 | Malignant neoplasm nervous system |
| 6  | N75 | Benign neoplasm nervous system    |
| 7  | N76 | Neoplasm nervous system unspec.   |
| 8  |     |                                   |
| 9  | N85 | Congenital anomaly neurological   |
| 10 | N86 | Multiple sclerosis                |
| 11 | N87 | Parkinsonism                      |
| 12 | N88 | Epilepsy                          |
| 13 |     |                                   |
| 14 | N89 | Migraine                          |
| 15 | N90 | Cluster headache                  |
| 16 | N91 | Facial paralysis/bell's palsy     |
| 17 | N92 | Trigeminal neuralgia              |
| 18 | N93 | Carpal tunnel syndrome            |
| 19 |     |                                   |
| 20 | N94 | Peripheral neuritis/neuropathy    |
| 21 | N99 | Neurological disease, other       |
| 22 |     |                                   |
| 23 | P01 | Feeling anxious/nervous/tense     |
| 24 | P02 | Acute stress reaction             |
| 25 | P03 | Feeling depressed                 |
| 26 |     |                                   |
| 27 | P04 | Feeling/behaving irritable/angry  |
| 28 | P06 | Sleep disturbance                 |
| 29 | P10 | Stammering/stuttering/tic         |
| 30 |     |                                   |
| 31 | P11 | Eating problem in child           |
| 32 | P12 | Bedwetting/enuresis               |
| 33 | P13 | Encopresis/bowel training problem |
| 34 | P20 | Memory disturbance                |
| 35 |     |                                   |
| 36 | P21 | ADHD                              |
| 37 | P22 | Child behaviour symptom/complaint |
| 38 | P23 | Adolescent behav. Symptom/compl.  |
| 39 | P24 | Specific learning problem         |
| 40 |     |                                   |
| 41 | P71 | Organic psychosis other           |
| 42 | P72 | Schizophrenia                     |
| 43 | P73 | Affective psychosis               |
| 44 |     |                                   |
| 45 | P74 | Anxiety disorder/anxiety state    |
| 46 | P75 | Somatization disorder             |
| 47 | P76 | Depressive disorder               |
| 48 | P78 | Neuraesthesia/surmenage           |
| 49 |     |                                   |
| 50 | P79 | Phobia/compulsive disorder        |
| 51 | P85 | Mental retardation                |
| 52 | P98 | Psychosis NOS/other               |
| 53 |     |                                   |
| 54 | P99 | Psychological disorders, other    |
| 55 | R01 | Pain respiratory system           |
| 56 | R02 | Shortness of breath/dyspnoea      |
| 57 |     |                                   |
| 58 | R03 | Wheezing                          |
| 59 |     |                                   |
| 60 |     |                                   |

|    |     |                                      |
|----|-----|--------------------------------------|
| 1  |     |                                      |
| 2  |     |                                      |
| 3  |     |                                      |
| 4  | R04 | Breathing problem, other             |
| 5  | R05 | Cough                                |
| 6  | R06 | Nose bleed/epistaxis                 |
| 7  | R07 | Sneezing/nasal congestion            |
| 8  | R08 | Nose symptom/complaint other         |
| 9  | R09 | Sinus symptom/complaint              |
| 10 | R21 | Throat symptom/complaint             |
| 11 | R22 | Tonsils symptom/complaint            |
| 12 | R23 | Voice symptom/complaint              |
| 13 | R24 | Haemoptysis                          |
| 14 | R25 | Sputum/phlegm abnormal               |
| 15 | R29 | Respiratory symptom/complaint oth.   |
| 16 | R70 | Tuberculosis airways                 |
| 17 | R71 | Whooping cough                       |
| 18 | R72 | Strep throat                         |
| 19 | R73 | Boil/abscess nose                    |
| 20 | R74 | Upper respiratory infection acute    |
| 21 | R75 | Sinusitis acute/chronic              |
| 22 | R76 | Tonsillitis acute                    |
| 23 | R77 | Laryngitis/tracheitis acute          |
| 24 | R78 | Acute bronchitis/bronchiolitis       |
| 25 | R80 | Influenza                            |
| 26 | R81 | Pneumonia                            |
| 27 | R82 | Pleurisy/pleural effusion            |
| 28 | R83 | Respiratory infection other          |
| 29 | R84 | Malignant neoplasm bronchus/lung     |
| 30 | R85 | Malinant neoplasm respiratory, other |
| 31 | R86 | Benign neoplasm respiratory          |
| 32 | R87 | Foreign body nose/larynx/bronch      |
| 33 | R89 | Congenital anomaly respiratory       |
| 34 | R90 | Hypertrophy tonsils/adenoids         |
| 35 | R91 | Chronic bronchitis                   |
| 36 | R93 | Pleural effusion                     |
| 37 | R95 | Chronic obstructive pulmonary dis    |
| 38 | R96 | Asthma                               |
| 39 | R97 | Allergic rhinitis                    |
| 40 | R98 | Hyperventilation syndrome            |
| 41 | R99 | Respiratory disease other            |
| 42 | S01 | Pain/tenderness of skin              |
| 43 | S02 | Pruritus                             |
| 44 | S03 | Warts                                |
| 45 | S04 | Lump/swelling localized              |
| 46 | S05 | Lumps/swellings generalized          |
| 47 |     |                                      |
| 48 |     |                                      |
| 49 |     |                                      |
| 50 |     |                                      |
| 51 |     |                                      |
| 52 |     |                                      |
| 53 |     |                                      |
| 54 |     |                                      |
| 55 |     |                                      |
| 56 |     |                                      |
| 57 |     |                                      |
| 58 |     |                                      |
| 59 |     |                                      |
| 60 |     |                                      |

|    |     |                                    |
|----|-----|------------------------------------|
| 1  |     |                                    |
| 2  |     |                                    |
| 3  |     |                                    |
| 4  | S06 | Rash localized                     |
| 5  | S07 | Rash generalized                   |
| 6  | S08 | Skin colour change                 |
| 7  | S09 | Infected finger/toe                |
| 8  | S10 | Boil/carbuncle                     |
| 9  |     |                                    |
| 10 | S11 | Skin infection post-traumatic      |
| 11 | S12 | Insect bite/sting                  |
| 12 | S13 | Animal/human bite                  |
| 13 | S14 | Burn/scald                         |
| 14 | S15 | Foreign body in skin               |
| 15 | S20 | Corn/callosity                     |
| 16 |     |                                    |
| 17 | S21 | Skin texture symptom/complaint     |
| 18 | S22 | Nail symptom/complaint             |
| 19 | S23 | Hair loss/baldness                 |
| 20 | S24 | Hair/scalp symptom/complaint       |
| 21 |     |                                    |
| 22 | S70 | Herpes zoster                      |
| 23 | S71 | Herpes simplex                     |
| 24 | S72 | Scabies/other acariasis            |
| 25 | S73 | Pediculosis/skin infestation other |
| 26 | S74 | Dermatophytosis                    |
| 27 | S75 | Moniliasis/candidiasis skin        |
| 28 | S76 | Skin infection other               |
| 29 | S77 | Malignant neoplasm of skin         |
| 30 | S78 | Lipoma                             |
| 31 | S79 | Neoplasm skin benign/unspecified   |
| 32 | S80 | Solar keratosis/sunburn            |
| 33 | S81 | Haemangioma/lymphangioma           |
| 34 | S82 | Naevus/mole                        |
| 35 | S83 | Congenital skin anomaly other      |
| 36 | S84 | Impetigo                           |
| 37 | S85 | Pilonidal cyst/fistula             |
| 38 | S86 | Dermatitis seborrhoeic             |
| 39 | S87 | Dermatitis/atopic eczema           |
| 40 | S89 | Diaper rash                        |
| 41 | S90 | Pityriasis rosea                   |
| 42 | S91 | Psoriasis                          |
| 43 | S92 | Sweat gland disease                |
| 44 | S93 | Sebaceous cyst                     |
| 45 | S94 | Ingrowing nail                     |
| 46 | S95 | Molluscum contagiosum              |
| 47 | S96 | Acne                               |
| 48 | S97 | Chronic ulcer skin                 |
| 49 | S98 | Urticaria                          |
| 50 |     |                                    |
| 51 |     |                                    |
| 52 |     |                                    |
| 53 |     |                                    |
| 54 |     |                                    |
| 55 |     |                                    |
| 56 |     |                                    |
| 57 |     |                                    |
| 58 |     |                                    |
| 59 |     |                                    |
| 60 |     |                                    |

|    |     |                                    |
|----|-----|------------------------------------|
| 1  |     |                                    |
| 2  |     |                                    |
| 3  |     |                                    |
| 4  | S99 | Skin disease, other                |
| 5  | T01 | Excessive thirst                   |
| 6  | T02 | Excessive appetite                 |
| 7  | T03 | Loss of appetite                   |
| 8  | T04 | Feeding problem of infant/child    |
| 9  | T05 | Feeding problem of adult           |
| 10 | T06 | Anorexia nervosa                   |
| 11 | T07 | Weight gain                        |
| 12 | T08 | Weight loss                        |
| 13 | T10 | Growth delay                       |
| 14 | T11 | Dehydration                        |
| 15 | T15 | Tumor thyroid                      |
| 16 | T70 | Endocrine infection                |
| 17 | T71 | Malignant neoplasm thyroid         |
| 18 | T72 | Benign neoplasm thyroid            |
| 19 | T73 | Neoplasm endocrine oth/unspecified |
| 20 | T78 | Thyroglossal duct/cys              |
| 21 | T80 | Congenital anom endocrine/metab    |
| 22 | T81 | Goitre                             |
| 23 | T82 | Obesity                            |
| 24 | T83 | Overweight                         |
| 25 | T85 | Hyperthyroidism/thyrotoxicosis     |
| 26 | T86 | Hypothyroidism/myxoedema           |
| 27 | T87 | Hypoglycaemia                      |
| 28 | T88 | Renal glycosuria                   |
| 29 | T89 | Diabetes insulin dependent         |
| 30 | T90 | Diabetes non-insulin dependent     |
| 31 | T91 | Vitamin/nutritional deficiency     |
| 32 | T92 | Gout                               |
| 33 | T93 | Lipid disorder                     |
| 34 | T99 | Endocrine/metab/nutrit. dis. other |
| 35 | U01 | Dysuria/painful urination          |
| 36 | U02 | Urinary frequency/urgency          |
| 37 | U04 | Incontinence urine                 |
| 38 | U05 | Urination problems other           |
| 39 | U06 | Haematuria                         |
| 40 | U07 | Urine symptom/complaint other      |
| 41 | U13 | Bladder symptom/complaint other    |
| 42 | U14 | Kidney symptom/complaint           |
| 43 | U70 | Pyelonephritis/pyelitis            |
| 44 | U71 | Cystitis/urinary infection other   |
| 45 | U72 | Urethritis                         |
| 46 | U75 | Malignant neoplasm of kidney       |
| 47 |     |                                    |
| 48 |     |                                    |
| 49 |     |                                    |
| 50 |     |                                    |
| 51 |     |                                    |
| 52 |     |                                    |
| 53 |     |                                    |
| 54 |     |                                    |
| 55 |     |                                    |
| 56 |     |                                    |
| 57 |     |                                    |
| 58 |     |                                    |
| 59 |     |                                    |
| 60 |     |                                    |

|    |     |                                   |
|----|-----|-----------------------------------|
| 1  |     |                                   |
| 2  |     |                                   |
| 3  | U76 | Malignant neoplasm of bladder     |
| 4  | U77 | Malignant neoplasm urinary other  |
| 5  | U78 | Benign neoplasm urinary tract     |
| 6  | U79 | Neoplasm urinary tract NOS        |
| 7  | U85 | Congenital anomaly urinary tract  |
| 8  | U88 | Glomerulonephritis/nephrosis      |
| 9  | U90 | Orthostatic albumin/proteinuria   |
| 10 | U95 | Urinary calculus                  |
| 11 | U98 | Abnormal urine test NOS           |
| 12 | U99 | Urinary disease, other            |
| 13 | X83 | Congenital anomaly genital female |
| 14 | X84 | Vaginitis/vulvitis NOS            |
| 15 | X85 | Cervical disease NOS              |
| 16 | X99 | Genital disease female, other     |
| 17 | Y74 | Orchitis/epididymitis             |
| 18 | Y75 | Balanitis                         |
| 19 | Y81 | Phimosis/redundant prepuce        |
| 20 | Y82 | Hypospadias                       |
| 21 | Y83 | Undescended testicle              |
| 22 | Y84 | Congenital genl anomaly (m) other |
| 23 | Y99 | Genital disease male, other       |
| 24 |     |                                   |
| 25 |     |                                   |
| 26 |     |                                   |
| 27 |     |                                   |
| 28 |     |                                   |
| 29 |     |                                   |
| 30 |     |                                   |
| 31 |     |                                   |
| 32 |     |                                   |
| 33 |     |                                   |
| 34 |     |                                   |
| 35 |     |                                   |
| 36 |     |                                   |
| 37 |     |                                   |
| 38 |     |                                   |
| 39 |     |                                   |
| 40 |     |                                   |
| 41 |     |                                   |
| 42 |     |                                   |
| 43 |     |                                   |
| 44 |     |                                   |
| 45 |     |                                   |
| 46 |     |                                   |
| 47 |     |                                   |
| 48 |     |                                   |
| 49 |     |                                   |
| 50 |     |                                   |
| 51 |     |                                   |
| 52 |     |                                   |
| 53 |     |                                   |
| 54 |     |                                   |
| 55 |     |                                   |
| 56 |     |                                   |
| 57 |     |                                   |
| 58 |     |                                   |
| 59 |     |                                   |
| 60 |     |                                   |

STROBE 2007 (v4) checklist of items to be included in reports of observational studies in epidemiology\*  
Checklist for cohort, case-control, and cross-sectional studies (combined)

| Section/Topic             | Item # | Recommendation                                                                                                                                                                                                                                                                                                                                                                                                                                                         | Reported on page # |
|---------------------------|--------|------------------------------------------------------------------------------------------------------------------------------------------------------------------------------------------------------------------------------------------------------------------------------------------------------------------------------------------------------------------------------------------------------------------------------------------------------------------------|--------------------|
| Title and abstract        | 1      | (a) Indicate the study's design with a commonly used term in the title or the abstract                                                                                                                                                                                                                                                                                                                                                                                 | 1                  |
|                           |        | (b) Provide in the abstract an informative and balanced summary of what was done and what was found                                                                                                                                                                                                                                                                                                                                                                    | 2                  |
| Introduction              |        |                                                                                                                                                                                                                                                                                                                                                                                                                                                                        |                    |
| Background/rationale      | 2      | Explain the scientific background and rationale for the investigation being reported                                                                                                                                                                                                                                                                                                                                                                                   | 4-5                |
| Objectives                | 3      | State specific objectives, including any pre-specified hypotheses                                                                                                                                                                                                                                                                                                                                                                                                      | 4-5                |
| Methods                   |        |                                                                                                                                                                                                                                                                                                                                                                                                                                                                        |                    |
| Study design              | 4      | Present key elements of study design early in the paper                                                                                                                                                                                                                                                                                                                                                                                                                | 6-9                |
| Setting                   | 5      | Describe the setting, locations, and relevant dates, including periods of recruitment, exposure, follow-up, and data collection                                                                                                                                                                                                                                                                                                                                        | 6                  |
| Participants              | 6      | (a) <i>Cohort study</i> —Give the eligibility criteria, and the sources and methods of selection of participants. Describe methods of follow-up<br><i>Case-control study</i> —Give the eligibility criteria, and the sources and methods of case ascertainment and control selection. Give the rationale for the choice of cases and controls<br><i>Cross-sectional study</i> —Give the eligibility criteria, and the sources and methods of selection of participants | 6-7                |
|                           |        | (b) <i>Cohort study</i> —For matched studies, give matching criteria and number of exposed and unexposed<br><i>Case-control study</i> —For matched studies, give matching criteria and the number of controls per case                                                                                                                                                                                                                                                 | 8                  |
| Variables                 | 7      | Clearly define all outcomes, exposures, predictors, potential confounders, and effect modifiers. Give diagnostic criteria, if applicable                                                                                                                                                                                                                                                                                                                               | 8-9                |
| Data sources/ measurement | 8*     | For each variable of interest, give sources of data and details of methods of assessment (measurement). Describe comparability of assessment methods if there is more than one group                                                                                                                                                                                                                                                                                   | 8-9                |
| Bias                      | 9      | Describe any efforts to address potential sources of bias                                                                                                                                                                                                                                                                                                                                                                                                              | 8-9                |
| Study size                | 10     | Explain how the study size was arrived at                                                                                                                                                                                                                                                                                                                                                                                                                              | 6-9                |
| Quantitative variables    | 11     | Explain how quantitative variables were handled in the analyses. If applicable, describe which groupings were chosen and why                                                                                                                                                                                                                                                                                                                                           | 8-9                |
| Statistical methods       | 12     | (a) Describe all statistical methods, including those used to control for confounding                                                                                                                                                                                                                                                                                                                                                                                  | 8-9                |
|                           |        | (b) Describe any methods used to examine subgroups and interactions                                                                                                                                                                                                                                                                                                                                                                                                    | 8-9                |
|                           |        | (c) Explain how missing data were addressed                                                                                                                                                                                                                                                                                                                                                                                                                            | N/A                |
|                           |        | (d) <i>Cohort study</i> —If applicable, explain how loss to follow-up was addressed<br><i>Case-control study</i> —If applicable, explain how matching of cases and controls was addressed                                                                                                                                                                                                                                                                              | 8-9                |

|                   |     |                                                                                                                                                                                                              |              |
|-------------------|-----|--------------------------------------------------------------------------------------------------------------------------------------------------------------------------------------------------------------|--------------|
|                   |     | <i>Cross-sectional study</i> —If applicable, describe analytical methods taking account of sampling strategy                                                                                                 |              |
|                   |     | (e) Describe any sensitivity analyses                                                                                                                                                                        | N/A          |
| Results           |     |                                                                                                                                                                                                              |              |
| Participants      | 13* | (a) Report numbers of individuals at each stage of study—eg numbers potentially eligible, examined for eligibility, confirmed eligible, included in the study, completing follow-up, and analysed            | 10           |
|                   |     | (b) Give reasons for non-participation at each stage                                                                                                                                                         | 10           |
|                   |     | (c) Consider use of a flow diagram                                                                                                                                                                           | N/A          |
| Descriptive data  | 14* | (a) Give characteristics of study participants (eg demographic, clinical, social) and information on exposures and potential confounders                                                                     | 10 + Table 1 |
|                   |     | (b) Indicate number of participants with missing data for each variable of interest                                                                                                                          | N/A          |
|                   |     | (c) <i>Cohort study</i> —Summarise follow-up time (eg, average and total amount)                                                                                                                             | N/A          |
| Outcome data      | 15* | <i>Cohort study</i> —Report numbers of outcome events or summary measures over time                                                                                                                          | N/A          |
|                   |     | <i>Case-control study</i> —Report numbers in each exposure category, or summary measures of exposure                                                                                                         | 10-12        |
|                   |     | <i>Cross-sectional study</i> —Report numbers of outcome events or summary measures                                                                                                                           | N/A          |
| Main results      | 16  | (a) Give unadjusted estimates and, if applicable, confounder-adjusted estimates and their precision (eg, 95% confidence interval). Make clear which confounders were adjusted for and why they were included | 10-12        |
|                   |     | (b) Report category boundaries when continuous variables were categorized                                                                                                                                    | N/A          |
|                   |     | (c) If relevant, consider translating estimates of relative risk into absolute risk for a meaningful time period                                                                                             | N/A          |
| Other analyses    | 17  | Report other analyses done—eg analyses of subgroups and interactions, and sensitivity analyses                                                                                                               | 10-12        |
| Discussion        |     |                                                                                                                                                                                                              |              |
| Key results       | 18  | Summarise key results with reference to study objectives                                                                                                                                                     | 13           |
| Limitations       | 19  | Discuss limitations of the study, taking into account sources of potential bias or imprecision. Discuss both direction and magnitude of any potential bias                                                   | 15-16        |
| Interpretation    | 20  | Give a cautious overall interpretation of results considering objectives, limitations, multiplicity of analyses, results from similar studies, and other relevant evidence                                   | 13-147       |
| Generalisability  | 21  | Discuss the generalisability (external validity) of the study results                                                                                                                                        | 16           |
| Other information |     |                                                                                                                                                                                                              |              |
| Funding           | 22  | Give the source of funding and the role of the funders for the present study and, if applicable, for the original study on which the present article is based                                                | 17           |

\*Give information separately for cases and controls in case-control studies and, if applicable, for exposed and unexposed groups in cohort and cross-sectional studies.

Note: An Explanation and Elaboration article discusses each checklist item and gives methodological background and published examples of transparent reporting. The STROBE checklist is best used in conjunction with this article (freely available on the Web sites of PLoS Medicine at <http://www.plosmedicine.org/>, Annals of Internal Medicine at <http://www.annals.org/>, and Epidemiology at <http://www.epidem.com/>). Information on the STROBE Initiative is available at [www.strobe-statement.org](http://www.strobe-statement.org).
