# Supplementary material for: Risks for comorbidity in children with atopic disorders: an observational study in Dutch general practices
Source: PubMed Central journal article supplement — BMJ Open. 2017 Nov 12;7(11):e018091. doi: 10.1136/bmjopen-2017-018091 (PMC5695444; doi:10.1136/bmjopen-2017-018091), 2017-11-12
Supplement: bmjopen-2017-018091supp001.pdf [file bmjopen-2017-018091supp001.pdf]

# Appendix 1

| ICPC codes | Description                          |
|------------|--------------------------------------|
| A03        | Fever                                |
| A04        | Weakness/tiredness general           |
| A12        | Allergic reaction                    |
| A15        | Excessive crying infant              |
| A16        | Irritable infant                     |
| A70        | Tuberculosis                         |
| A71        | Measles                              |
| A72        | Chickenpox                           |
| A73        | Malaria                              |
| A74        | Rubella                              |
| A75        | Infectious mononucleosis             |
| A76        | Viral exanthem other                 |
| A77        | Viral disease other/NOS              |
| A78        | Infectious disease other/NOS         |
| A79        | Malignancy NOS                       |
| A84        | Poisoning by medical agent           |
| A85        | Adverse effect medical agent         |
| A86        | Toxic effect non-medicinal substance |
| A87        | Complication of medical treatment    |
| A88        | Adverse effect physical factor       |
| A90        | Congenital anomaly OS/multiple       |
| A92        | Allergy/allergic reaction NOS        |
| A93        | Premature newborn                    |
| A94        | Perinatal morbidity other            |
| A95        | Perinatal mortality                  |
| A96        | Death                                |
| B02        | Lymph gland(s) enlarged/painful      |
| B70        | Lymphadenitis acute                  |
| B71        | Lymphadenitis non-specific           |
| B72        | Hodgkin's disease/lymphoma           |
| B73        | Leukaemia                            |
| B74        | Malignant neoplasm blood other       |
| B75        | Benign/unspecified neoplasm blood    |
| B78        | Hereditary haemolytic anaemia        |
| B79        | Congen.anom. blood/lymph other       |
| B80        | Iron deficiency anaemia              |
| B81        | Anaemia, Vitamin B12/folate def.     |
| B82        | Anaemia other/unspecified            |
| B83        | Purpura/coagulation defect           |

|     |                                      |
|-----|--------------------------------------|
| B84 | Unexplained abnormal white cells     |
| B87 | Splenomegaly                         |
| B90 | HIV-infection/aids                   |
| D01 | Abdominal pain/cramps general        |
| D02 | Abdominal pain epigastric            |
| D03 | Heartburn                            |
| D04 | Rectal/anal pain                     |
| D05 | Perianal itching                     |
| D06 | Abdominal pain localized other       |
| D07 | Dyspepsia/indigestion                |
| D08 | Flatulence/gas/belching              |
| D09 | Nausea                               |
| D10 | Vomiting                             |
| D11 | Diarrhoea                            |
| D12 | Constipation                         |
| D13 | Jaundice                             |
| D22 | Parasites                            |
| D70 | Gastrointestinal infection           |
| D71 | Mumps                                |
| D72 | Viral hepatitis                      |
| D73 | Gastroenteritis presumed infection   |
| D74 | Malignant neoplasm stomach           |
| D75 | Malignant neoplasm colon/rectum      |
| D76 | Malignant neoplasm pancreas          |
| D77 | Malig. neoplasm digest other/NOS     |
| D78 | Neoplasm digest benign/uncertain     |
| D79 | Foreign body digestive system        |
| D81 | Congen. anomaly digestive system     |
| D83 | Mouth/tongue/lip disease             |
| D84 | Oesophagus disease                   |
| D85 | Duodenal ulcer                       |
| D86 | Peptic ulcer other                   |
| D87 | Stomach function disorder            |
| D88 | Appendicitis                         |
| D89 | Inguinal hernia                      |
| D90 | Hiatus hernia                        |
| D91 | Abdominal hernia other               |
| D92 | Diverticular disease                 |
| D93 | Irritable bowel syndrome             |
| D94 | Chronic enteritis/ulcerative colitis |
| D95 | Anal fissure/perianal abscess        |
| D96 | Worms/other parasites                |
| D97 | Liver disease NOS                    |

|     |                                  |
|-----|----------------------------------|
| D98 | Cholecystitis/cholelithiasis     |
| D99 | Disease digestive system, other  |
| F01 | Eye pain                         |
| F02 | Red eye                          |
| F03 | Eye discharge                    |
| F04 | Visual floaters/spots            |
| F05 | Visual disturbance other         |
| F70 | Conjunctivitis infectious        |
| F71 | Conjunctivitis allergic          |
| F72 | Blepharitis/stye/chalazion       |
| F73 | Eye infection/inflammation other |
| F74 | Neoplasm of eye/adnexa           |
| F75 | Contusion/haemorrhage eye        |
| F76 | Foreign body in eye              |
| F80 | Blocked lacrimal duct of infant  |
| F81 | Congenital anomaly eye other     |
| F82 | Detached retina                  |
| F83 | Retinopathy                      |
| F84 | Macular degeneration             |
| F85 | Corneal ulcer                    |
| F86 | Trachoma                         |
| F91 | Refractive error                 |
| F92 | Cataract                         |
| F93 | Glaucoma                         |
| F94 | Blindness                        |
| F95 | Strabismus                       |
| F99 | Eye/adnexa disease, other        |
| H01 | Ear pain/earache                 |
| H02 | Hearing complaint                |
| H03 | Tinnitus, ringing/buzzing ear    |
| H04 | Ear discharge                    |
| H05 | Bleeding ear                     |
| H70 | Otitis externa                   |
| H71 | Acute otitis media/myringitis    |
| H72 | Serous otitis media              |
| H73 | Eustachian salpingitis           |
| H74 | Chronic otitis media             |
| H75 | Neoplasm of ear                  |
| H76 | Foreign body in ear              |
| H77 | Perforation ear drum             |
| H80 | Congenital anomaly of ear        |
| H81 | Excessive ear wax                |
| H82 | Vertiginous syndrome             |

|     |                                     |
|-----|-------------------------------------|
| H83 | Otosclerosis                        |
| H86 | Deafness                            |
| K01 | Heart pain                          |
| K02 | Pressure/tightness of heart         |
| K04 | Palpitations/awareness of heart     |
| K05 | Irregular heartbeat other           |
| K07 | Swollen ankles/oedema               |
| K29 | Cardiovascular sympt./complt. other |
| K70 | Infection of circulatory system     |
| K71 | Rheumatic fever/heart disease       |
| K72 | Neoplasm cardiovascular             |
| K73 | Congenital anomaly cardiovascular   |
| K74 | Ischaemic heart disease w. angina   |
| K75 | Acute myocardial infarction         |
| K76 | Ischaemic heart disease w/o angina  |
| K77 | Heart failure                       |
| K78 | Atrial fibrillation/flutter         |
| K79 | Paroxysmal tachycardia              |
| K80 | Cardiac arrhythmia NOS              |
| K81 | Heart/arterial murmur NOS           |
| K82 | Pulmonary heart disease             |
| K83 | Heart valve disease NOS             |
| K84 | Heart disease other                 |
| K85 | Elevated blood pressure             |
| K86 | Hypertension uncomplicated          |
| K87 | Hypertension complicated            |
| K88 | Postural hypotension                |
| K89 | Transient cerebral ischaemia        |
| K90 | Stroke/cerebrovascular accident     |
| K91 | Cerebrovascular disease             |
| K92 | Atherosclerosis/PVD                 |
| K93 | Pulmonary embolism                  |
| K94 | Phlebitis/thrombophlebitis          |
| K95 | Varicose veins of leg               |
| K96 | Haemorrhoids                        |
| K99 | Cardiovascular disease other        |
| L01 | Neck symptom/complain               |
| L02 | Back symptom/complaint              |
| L03 | Low back symptom/complaint          |
| L04 | Chest symptom/complaint             |
| L05 | Flank symptom/complaint             |
| L06 | Axilla symptom/complaint            |
| L07 | Jaw symptom/complaint               |

|     |                                    |
|-----|------------------------------------|
| L08 | Shoulder symptom/complaint         |
| L09 | Arm symptom/complaint              |
| L10 | Elbow symptom/complaint            |
| L11 | Wrist symptom/complaint            |
| L12 | Hand/finger symptom/complaint      |
| L13 | Hip symptom/complaint              |
| L14 | Leg/thigh symptom/complaint        |
| L15 | Knee symptom/complaint             |
| L16 | Ankle symptom/complaint            |
| L17 | Foot/toe symptom/complaint         |
| L18 | Muscle pain                        |
| L19 | Muscle symptom/complaint NOS       |
| L20 | Joint symptom/complaint NOS        |
| L70 | Infections musculoskeletal system  |
| L71 | Malignant neoplasm musculoskeletal |
| L82 | Congenital anomaly musculoskeletal |
| L83 | Neck syndrome                      |
| L84 | Back syndrome w/o radiating pain   |
| L85 | Acquired deformity of spine        |
| L86 | Back syndrome with radiating pain  |
| L87 | Bursitis/tendinitis/synovitis NOS  |
| L88 | Rheumatoid/seropositive arthritis  |
| L92 | Shoulder syndrome                  |
| L93 | Tennis elbow                       |
| L94 | Osteochondrosis                    |
| L95 | Osteoporosis                       |
| L97 | Neoplasm benign/unspec musculo.    |
| L98 | Acquired deformity of limb         |
| L99 | Musculoskeletal disease, other     |
| N01 | Headache                           |
| N02 | Tension headache                   |
| N03 | Pain face                          |
| N04 | Restless legs                      |
| N05 | Tingling fingers/feet/toes         |
| N06 | Sensation disturbance other        |
| N07 | Convulsion/seizure                 |
| N16 | Disturbance of smell/taste         |
| N17 | Vertigo/dizziness                  |
| N18 | Paralysis/weakness                 |
| N19 | Speech disorder                    |
| N70 | Poliomyelitis                      |
| N71 | Meningitis/encephalitis            |
| N72 | Tetanus                            |

|     |                                   |
|-----|-----------------------------------|
| N73 | Neurological infection other      |
| N74 | Malignant neoplasm nervous system |
| N75 | Benign neoplasm nervous system    |
| N76 | Neoplasm nervous system unspec.   |
| N85 | Congenital anomaly neurological   |
| N86 | Multiple sclerosis                |
| N87 | Parkinsonism                      |
| N88 | Epilepsy                          |
| N89 | Migraine                          |
| N90 | Cluster headache                  |
| N91 | Facial paralysis/bell's palsy     |
| N92 | Trigeminal neuralgia              |
| N93 | Carpal tunnel syndrome            |
| N94 | Peripheral neuritis/neuropathy    |
| N99 | Neurological disease, other       |
| P01 | Feeling anxious/nervous/tense     |
| P02 | Acute stress reaction             |
| P03 | Feeling depressed                 |
| P04 | Feeling/behaving irritable/angry  |
| P06 | Sleep disturbance                 |
| P10 | Stammering/stuttering/tic         |
| P11 | Eating problem in child           |
| P12 | Bedwetting/enuresis               |
| P13 | Encopresis/bowel training problem |
| P20 | Memory disturbance                |
| P21 | ADHD                              |
| P22 | Child behaviour symptom/complaint |
| P23 | Adolescent behav. Symptom/compl.  |
| P24 | Specific learning problem         |
| P71 | Organic psychosis other           |
| P72 | Schizophrenia                     |
| P73 | Affective psychosis               |
| P74 | Anxiety disorder/anxiety state    |
| P75 | Somatization disorder             |
| P76 | Depressive disorder               |
| P78 | Neuraesthesia/surmenage           |
| P79 | Phobia/compulsive disorder        |
| P85 | Mental retardation                |
| P98 | Psychosis NOS/other               |
| P99 | Psychological disorders, other    |
| R01 | Pain respiratory system           |
| R02 | Shortness of breath/dyspnoea      |
| R03 | Wheezing                          |

|     |                                      |
|-----|--------------------------------------|
| R04 | Breathing problem, other             |
| R05 | Cough                                |
| R06 | Nose bleed/epistaxis                 |
| R07 | Sneezing/nasal congestion            |
| R08 | Nose symptom/complaint other         |
| R09 | Sinus symptom/complaint              |
| R21 | Throat symptom/complaint             |
| R22 | Tonsils symptom/complaint            |
| R23 | Voice symptom/complaint              |
| R24 | Haemoptysis                          |
| R25 | Sputum/phlegm abnormal               |
| R29 | Respiratory symptom/complaint oth.   |
| R70 | Tuberculosis airways                 |
| R71 | Whooping cough                       |
| R72 | Strep throat                         |
| R73 | Boil/abscess nose                    |
| R74 | Upper respiratory infection acute    |
| R75 | Sinusitis acute/chronic              |
| R76 | Tonsillitis acute                    |
| R77 | Laryngitis/tracheitis acute          |
| R78 | Acute bronchitis/bronchiolitis       |
| R80 | Influenza                            |
| R81 | Pneumonia                            |
| R82 | Pleurisy/pleural effusion            |
| R83 | Respiratory infection other          |
| R84 | Malignant neoplasm bronchus/lung     |
| R85 | Malinant neoplasm respiratory, other |
| R86 | Benign neoplasm respiratory          |
| R87 | Foreign body nose/larynx/bronch      |
| R89 | Congenital anomaly respiratory       |
| R90 | Hypertrophy tonsils/adenoids         |
| R91 | Chronic bronchitis                   |
| R93 | Pleural effusion                     |
| R95 | Chronic obstructive pulmonary dis    |
| R96 | Asthma                               |
| R97 | Allergic rhinitis                    |
| R98 | Hyperventilation syndrome            |
| R99 | Respiratory disease other            |
| S01 | Pain/tenderness of skin              |
| S02 | Pruritus                             |
| S03 | Warts                                |
| S04 | Lump/swelling localized              |
| S05 | Lumps/swellings generalized          |

|     |                                    |
|-----|------------------------------------|
| S06 | Rash localized                     |
| S07 | Rash generalized                   |
| S08 | Skin colour change                 |
| S09 | Infected finger/toe                |
| S10 | Boil/carbuncle                     |
| S11 | Skin infection post-traumatic      |
| S12 | Insect bite/sting                  |
| S13 | Animal/human bite                  |
| S14 | Burn/scald                         |
| S15 | Foreign body in skin               |
| S20 | Corn/callosity                     |
| S21 | Skin texture symptom/complaint     |
| S22 | Nail symptom/complaint             |
| S23 | Hair loss/baldness                 |
| S24 | Hair/scalp symptom/complaint       |
| S70 | Herpes zoster                      |
| S71 | Herpes simplex                     |
| S72 | Scabies/other acariasis            |
| S73 | Pediculosis/skin infestation other |
| S74 | Dermatophytosis                    |
| S75 | Moniliasis/candidiasis skin        |
| S76 | Skin infection other               |
| S77 | Malignant neoplasm of skin         |
| S78 | Lipoma                             |
| S79 | Neoplasm skin benign/unspecified   |
| S80 | Solar keratosis/sunburn            |
| S81 | Haemangioma/lymphangioma           |
| S82 | Naevus/mole                        |
| S83 | Congenital skin anomaly other      |
| S84 | Impetigo                           |
| S85 | Pilonidal cyst/fistula             |
| S86 | Dermatitis seborrhoeic             |
| S87 | Dermatitis/atopic eczema           |
| S89 | Diaper rash                        |
| S90 | Pityriasis rosea                   |
| S91 | Psoriasis                          |
| S92 | Sweat gland disease                |
| S93 | Sebaceous cyst                     |
| S94 | Ingrowing nail                     |
| S95 | Molluscum contagiosum              |
| S96 | Acne                               |
| S97 | Chronic ulcer skin                 |
| S98 | Urticaria                          |



|     |                                    |
|-----|------------------------------------|
| S99 | Skin disease, other                |
| T01 | Excessive thirst                   |
| T02 | Excessive appetite                 |
| T03 | Loss of appetite                   |
| T04 | Feeding problem of infant/child    |
| T05 | Feeding problem of adult           |
| T06 | Anorexia nervosa                   |
| T07 | Weight gain                        |
| T08 | Weight loss                        |
| T10 | Growth delay                       |
| T11 | Dehydration                        |
| T15 | Tumor thyroid                      |
| T70 | Endocrine infection                |
| T71 | Malignant neoplasm thyroid         |
| T72 | Benign neoplasm thyroid            |
| T73 | Neoplasm endocrine oth/unspecified |
| T78 | Thyroglossal duct/cys              |
| T80 | Congenital anom endocrine/metab    |
| T81 | Goitre                             |
| T82 | Obesity                            |
| T83 | Overweight                         |
| T85 | Hyperthyroidism/thyrotoxicosis     |
| T86 | Hypothyroidism/myxoedema           |
| T87 | Hypoglycaemia                      |
| T88 | Renal glycosuria                   |
| T89 | Diabetes insulin dependent         |
| T90 | Diabetes non-insulin dependent     |
| T91 | Vitamin/nutritional deficiency     |
| T92 | Gout                               |
| T93 | Lipid disorder                     |
| T99 | Endocrine/metab/nutrit. dis. other |
| U01 | Dysuria/painful urination          |
| U02 | Urinary frequency/urgency          |
| U04 | Incontinence urine                 |
| U05 | Urination problems other           |
| U06 | Haematuria                         |
| U07 | Urine symptom/complaint other      |
| U13 | Bladder symptom/complaint other    |
| U14 | Kidney symptom/complaint           |
| U70 | Pyelonephritis/pyelitis            |
| U71 | Cystitis/urinary infection other   |
| U72 | Urethritis                         |
| U75 | Malignant neoplasm of kidney       |

|     |                                   |
|-----|-----------------------------------|
| U76 | Malignant neoplasm of bladder     |
| U77 | Malignant neoplasm urinary other  |
| U78 | Benign neoplasm urinary tract     |
| U79 | Neoplasm urinary tract NOS        |
| U85 | Congenital anomaly urinary tract  |
| U88 | Glomerulonephritis/nephrosis      |
| U90 | Orthostatic albumin/proteinuria   |
| U95 | Urinary calculus                  |
| U98 | Abnormal urine test NOS           |
| U99 | Urinary disease, other            |
| X83 | Congenital anomaly genital female |
| X84 | Vaginitis/vulvitis NOS            |
| X85 | Cervical disease NOS              |
| X99 | Genital disease female, other     |
| Y74 | Orchitis/epididymitis             |
| Y75 | Balanitis                         |
| Y81 | Phimosis/redundant prepuce        |
| Y82 | Hypospadias                       |
| Y83 | Undescended testicle              |
| Y84 | Congenital genl anomaly (m) other |
| Y99 | Genital disease male, other       |

---
